# Supplementary material
Source: publisher site journal article supplement (https://www.dovepress.com/article/535697)
Supplement: Supplementary file 1 [file 535697%20Supplmentary%20material.doc]

Figure S1


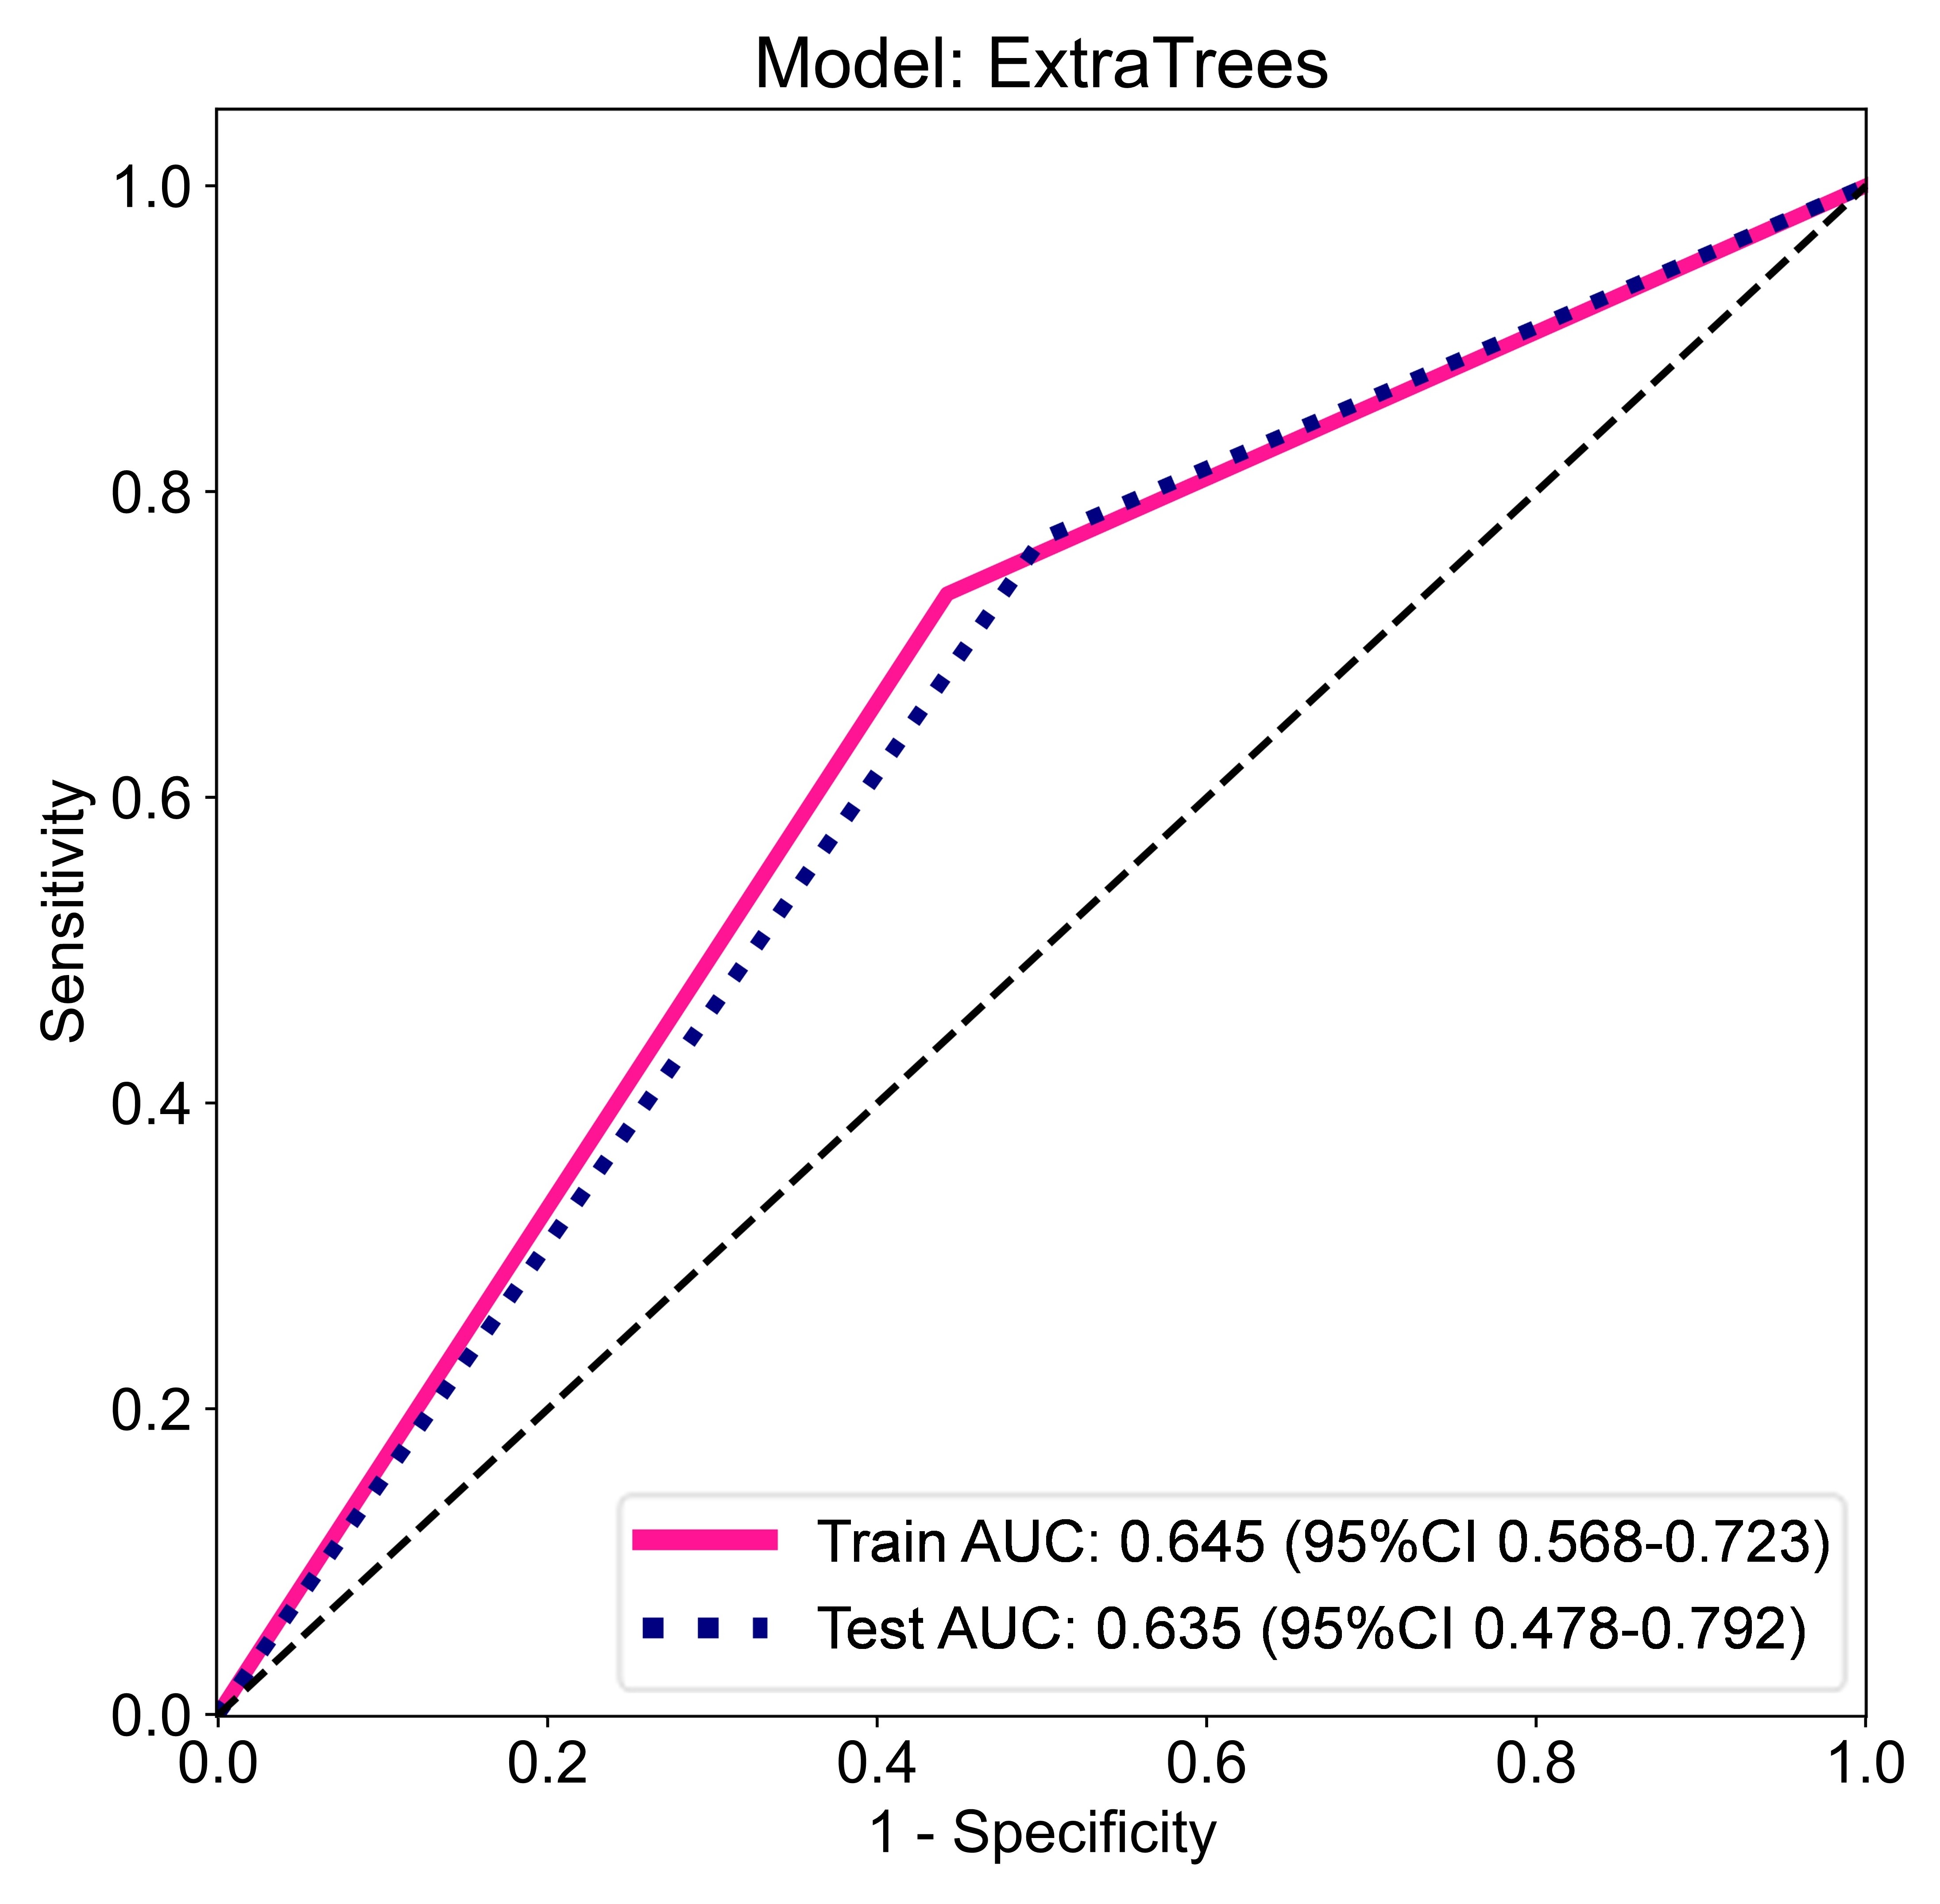


Figure S2


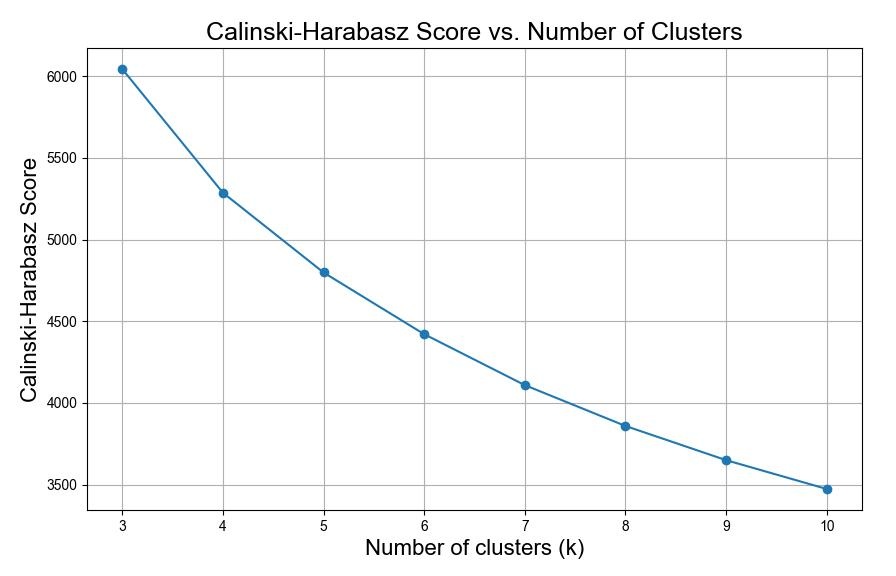


Figure S3A


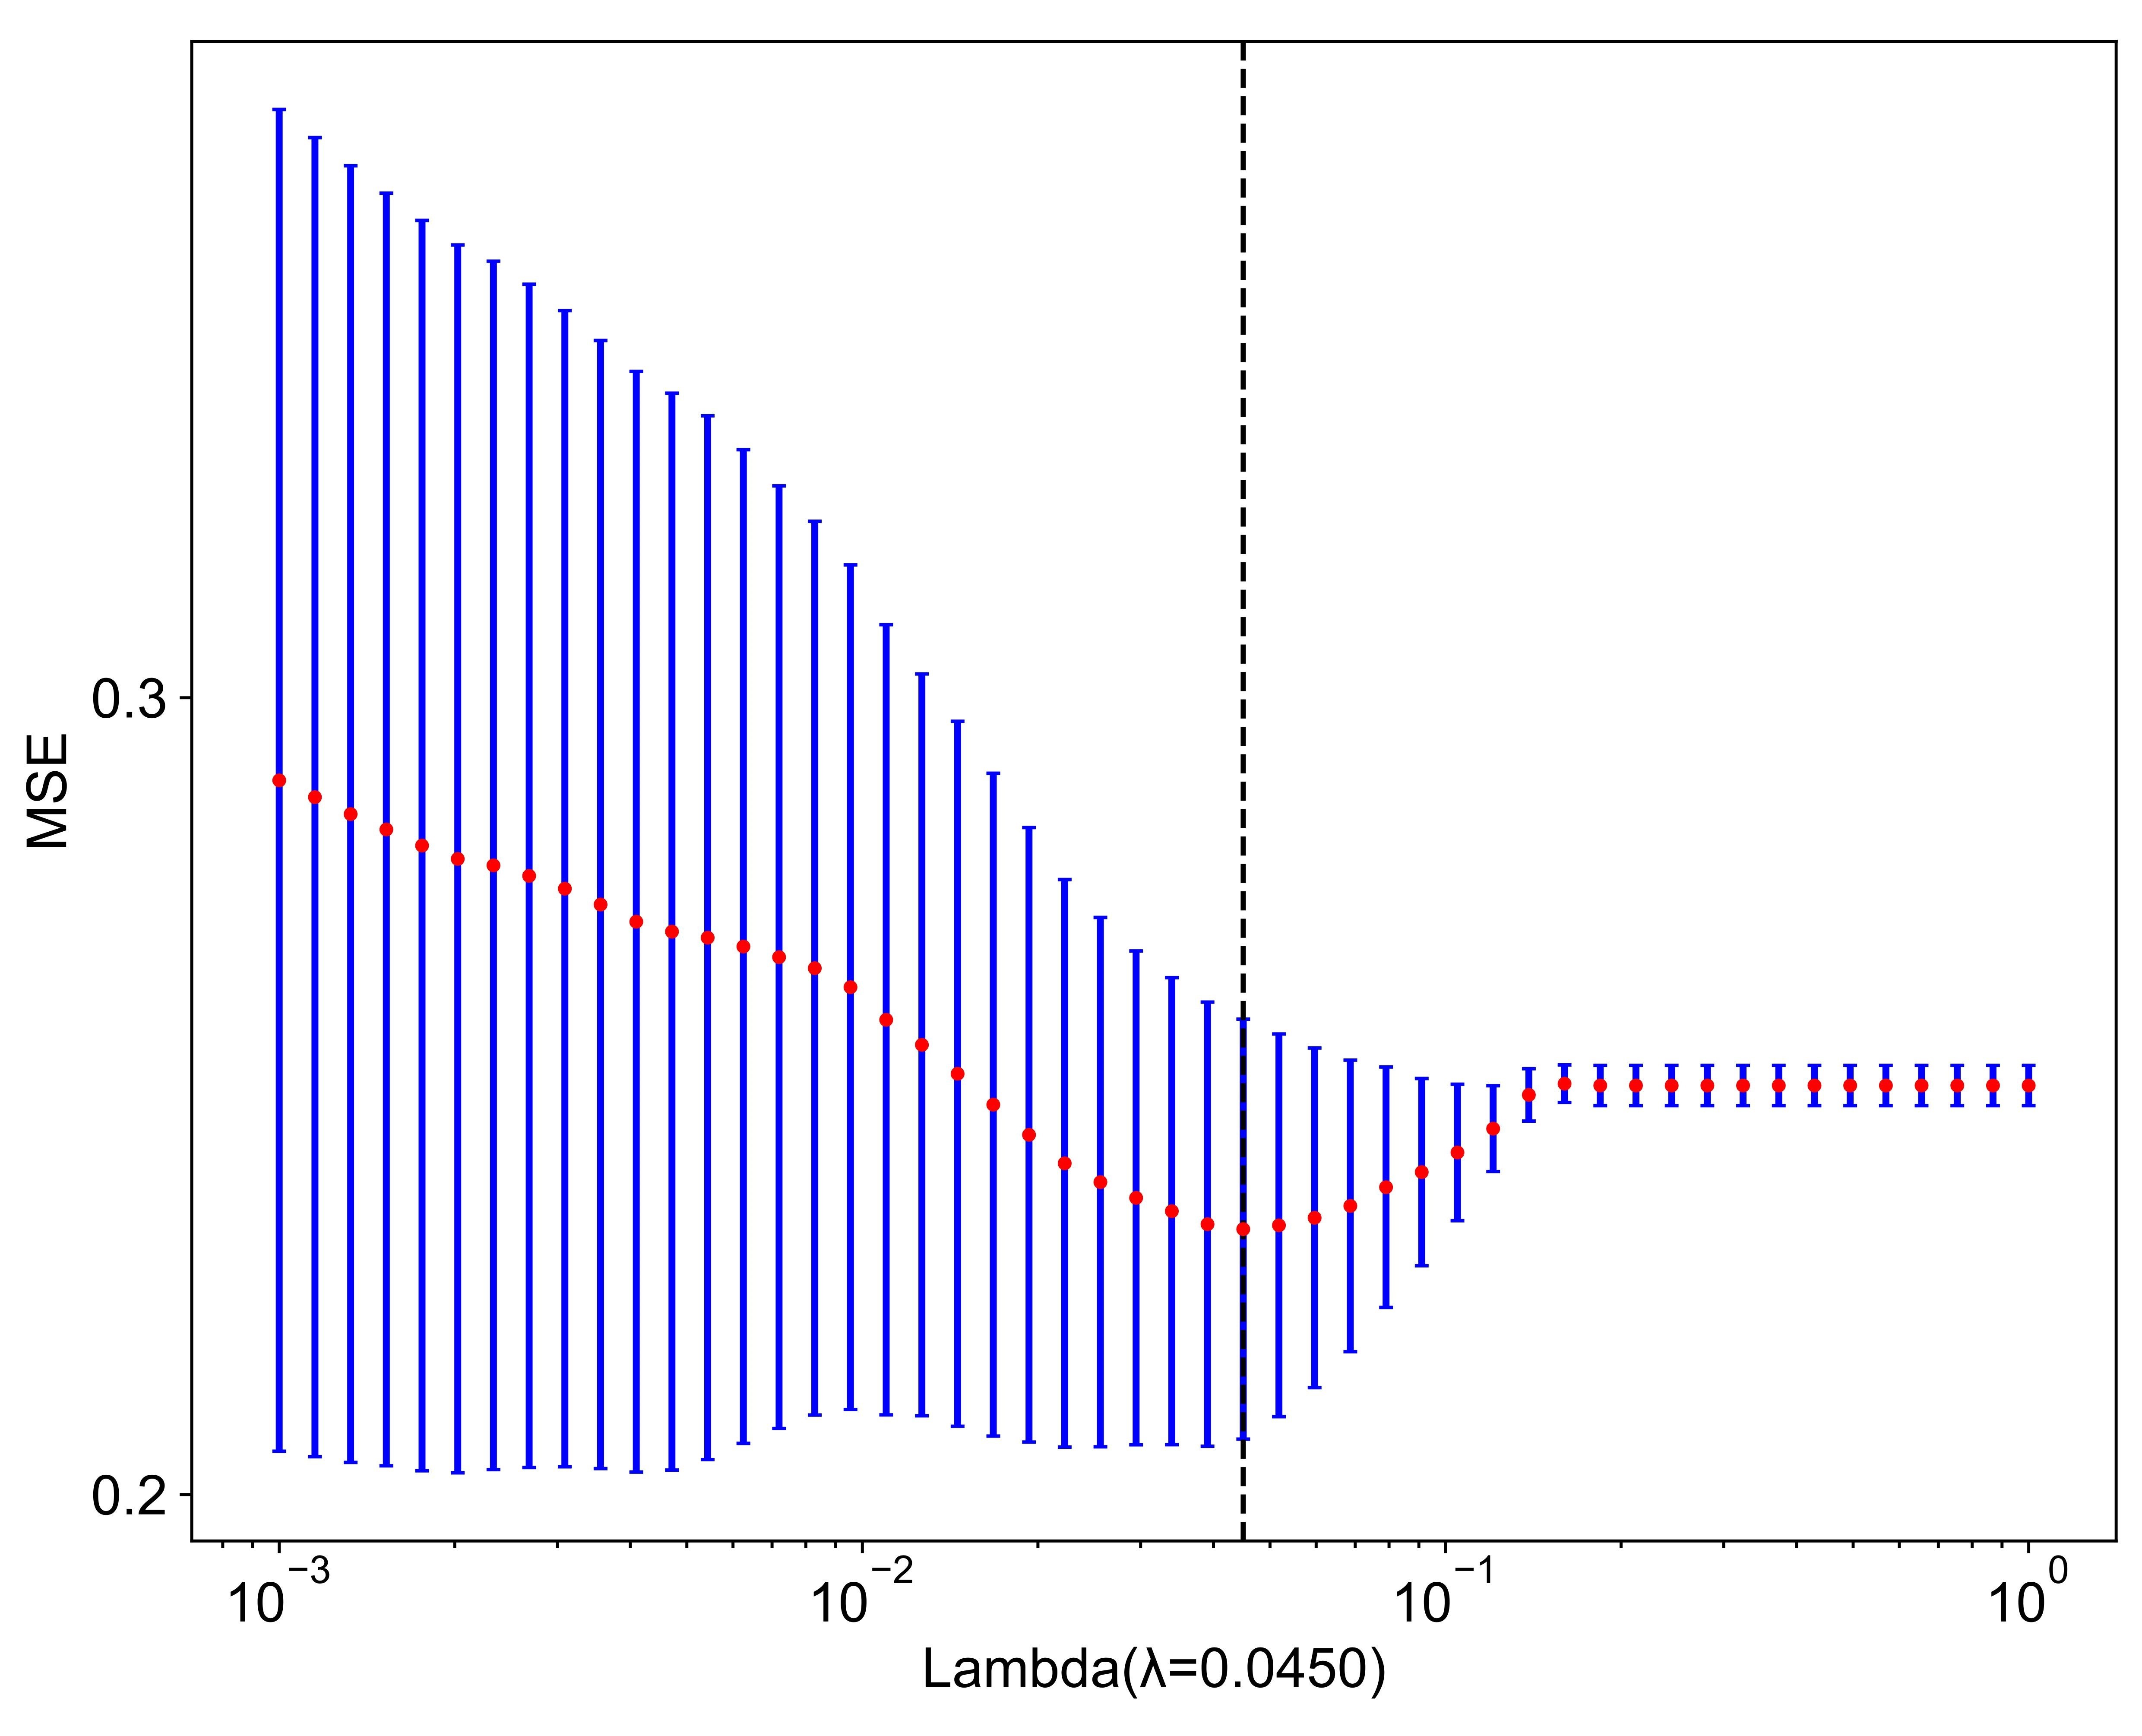


Figure S3B


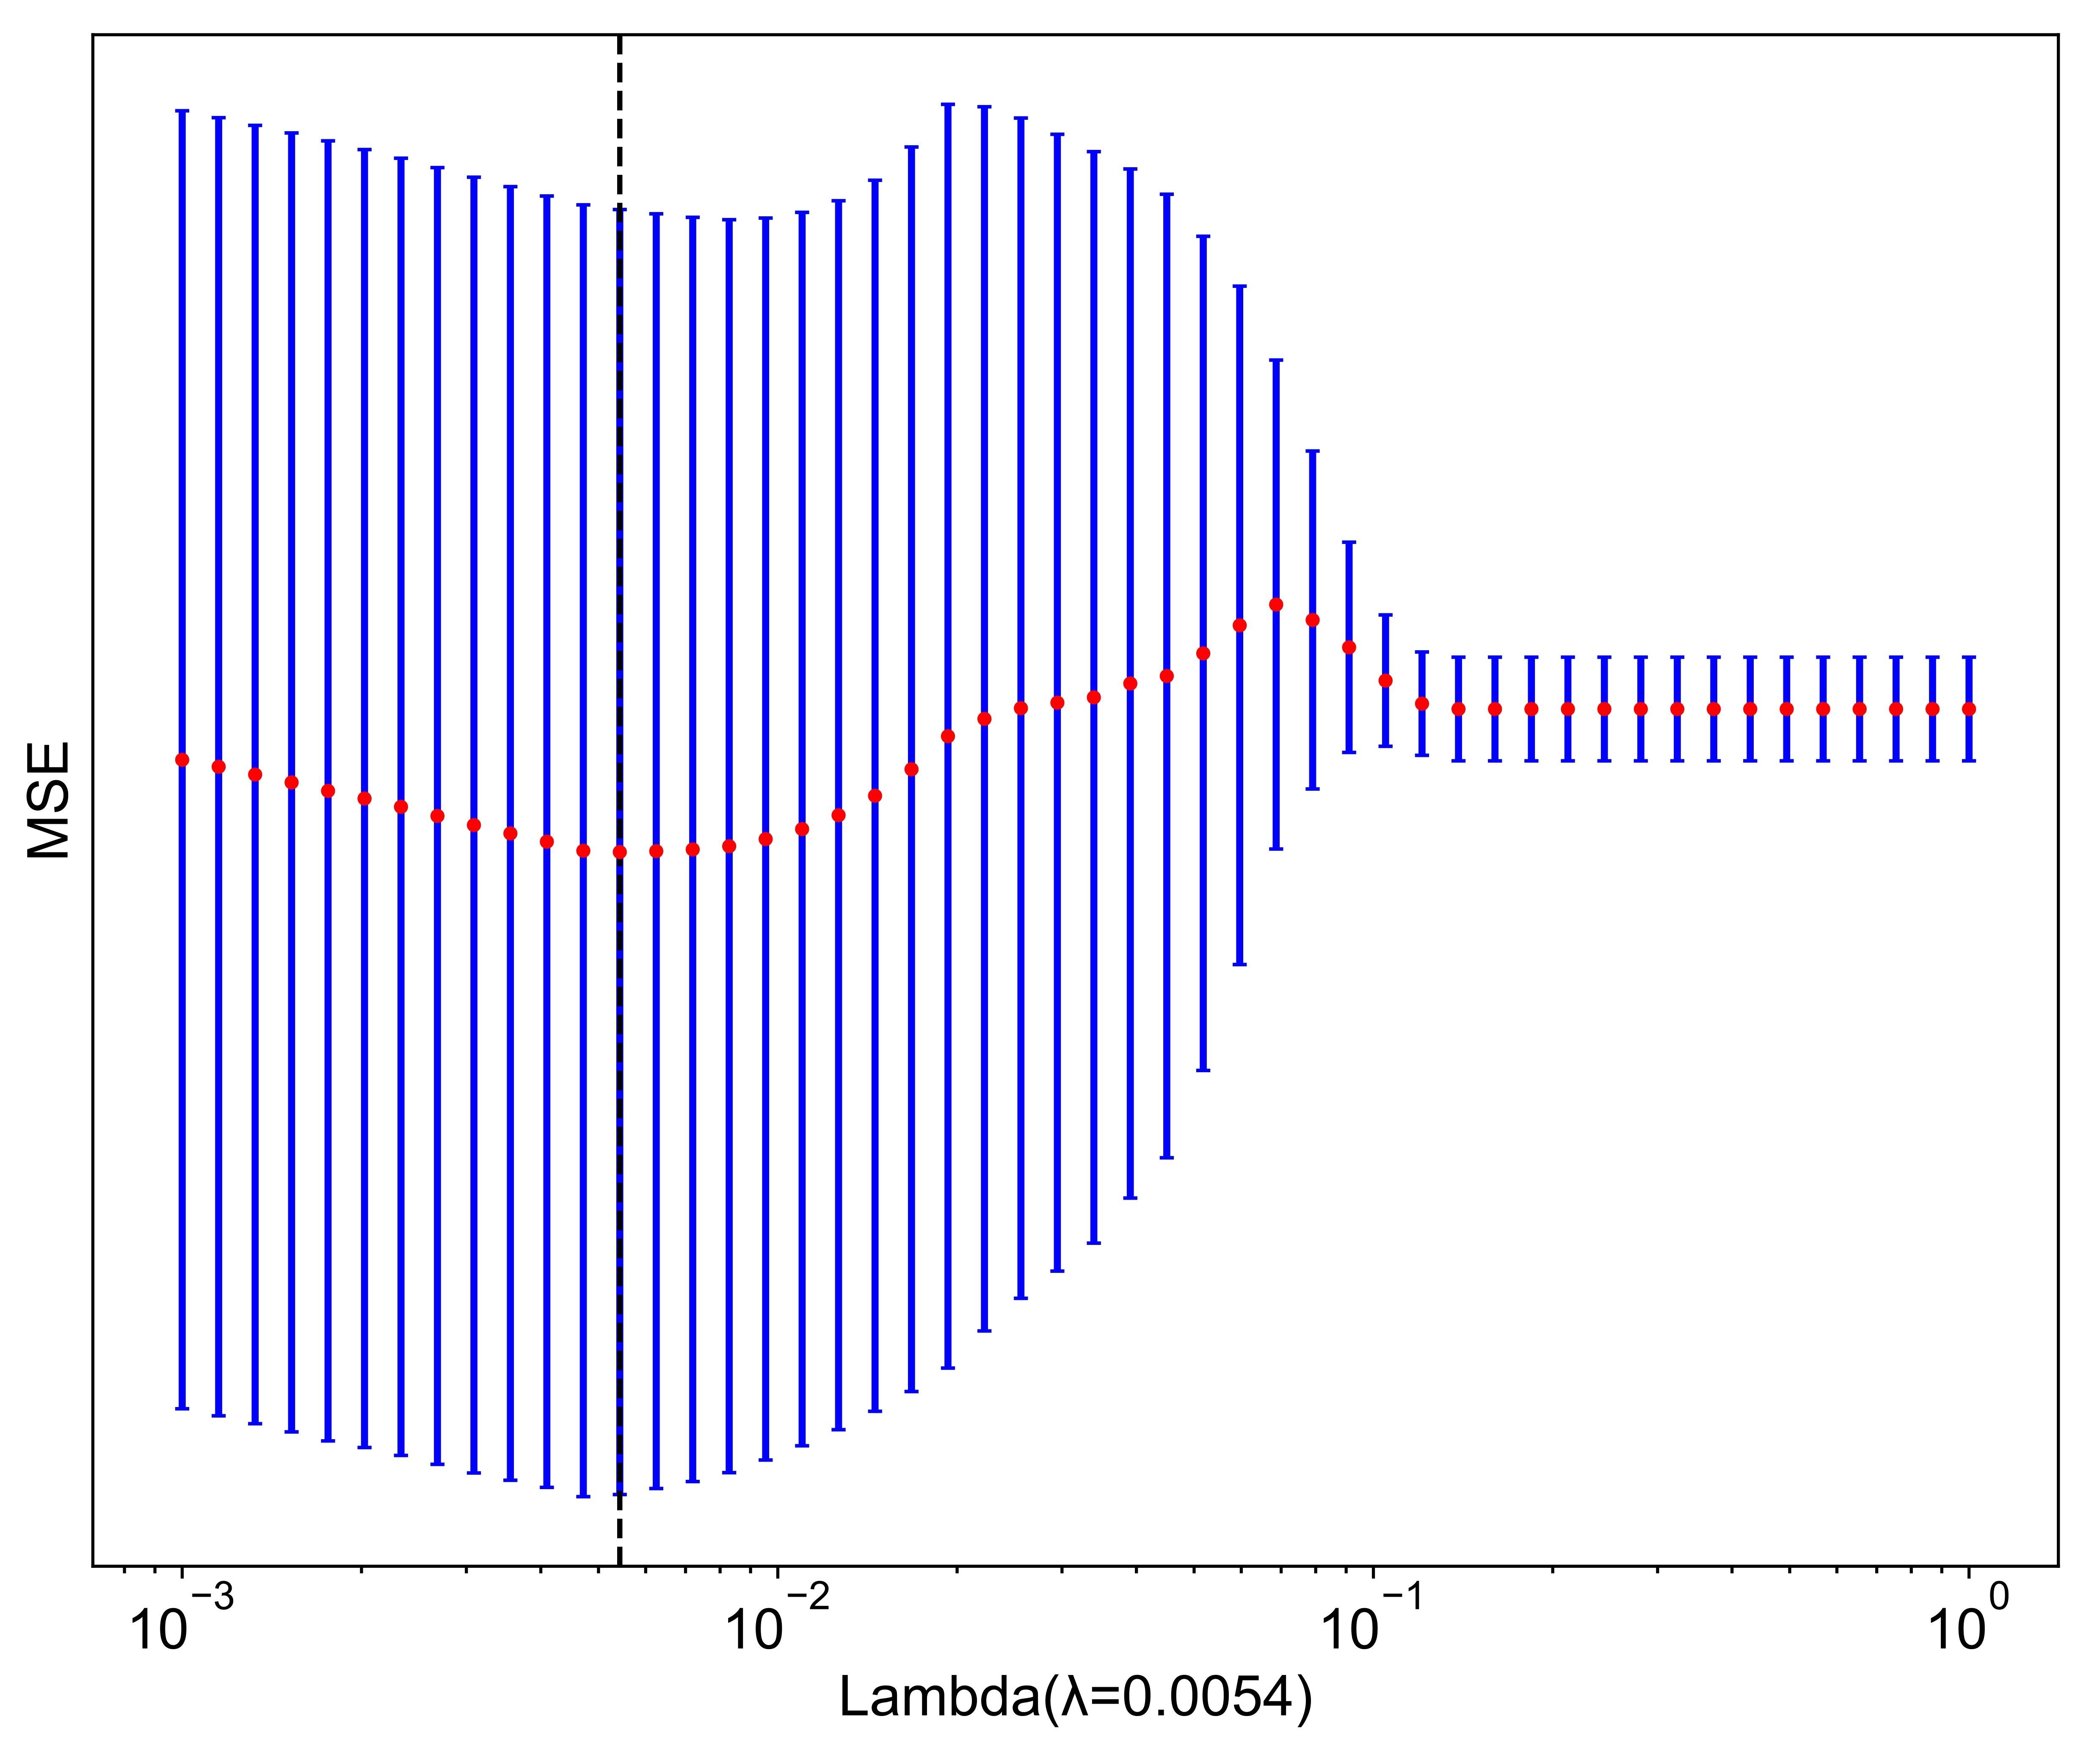


Figure S3C


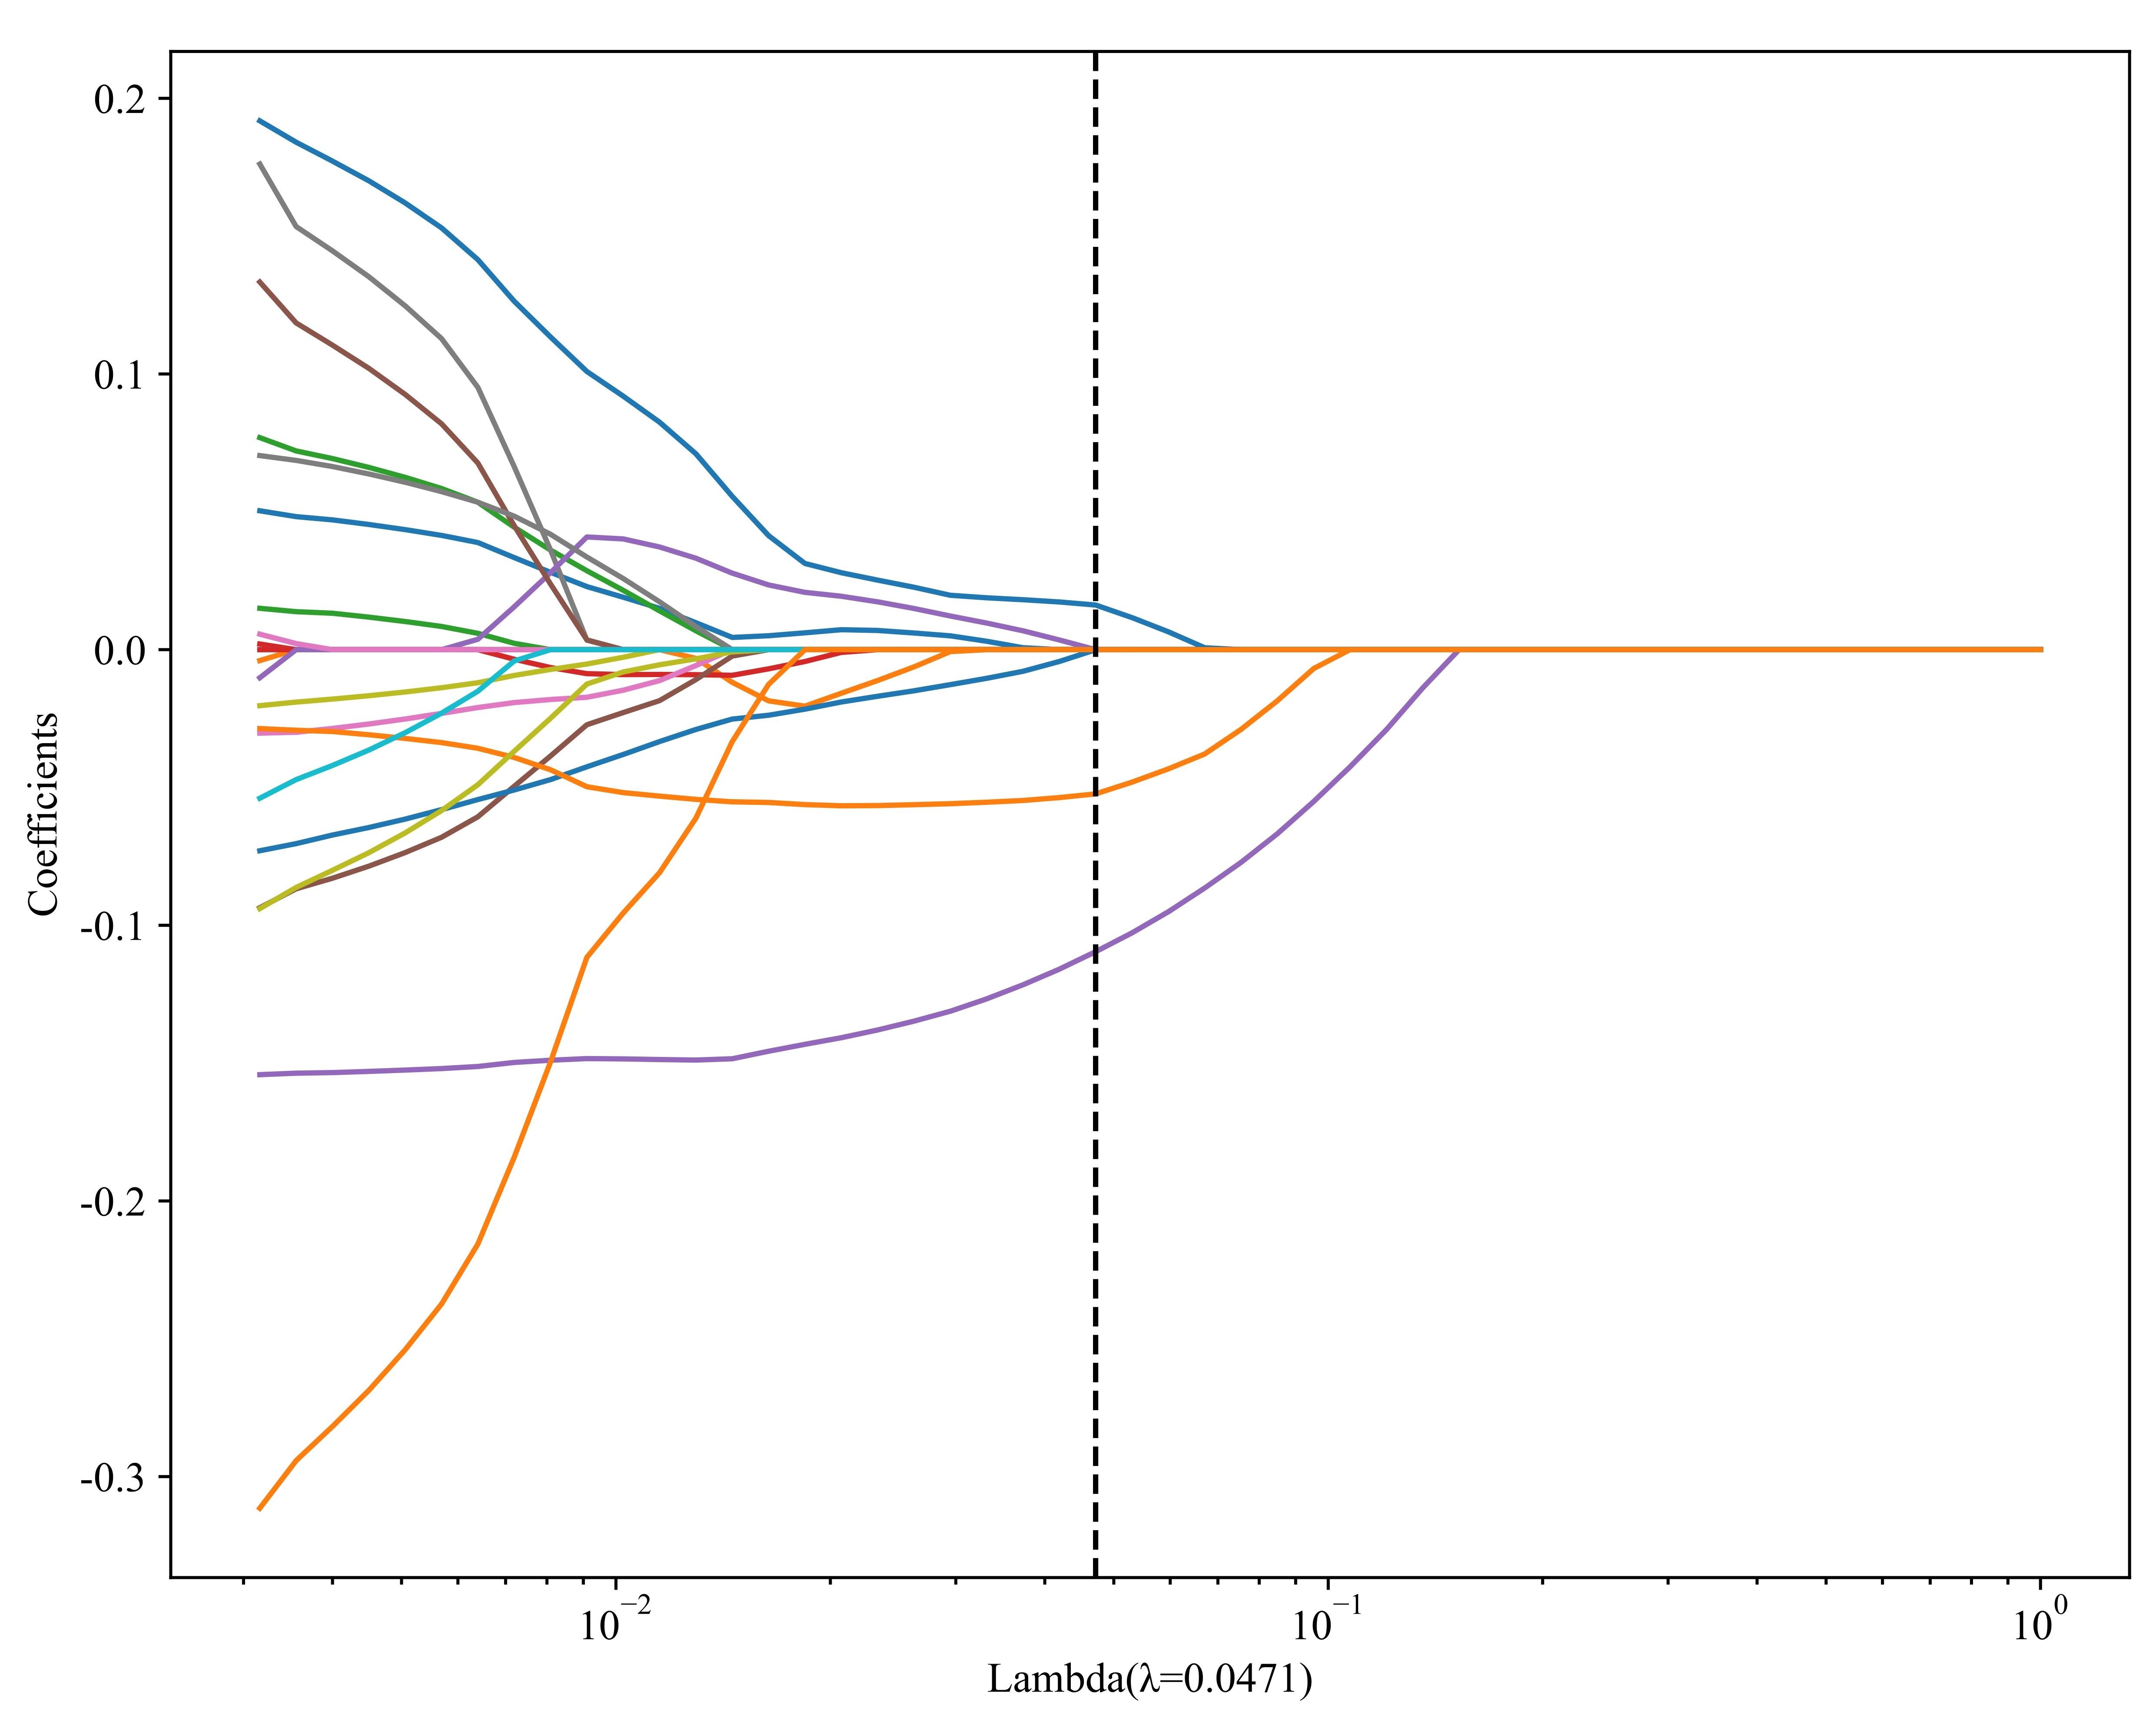


Figure S3D


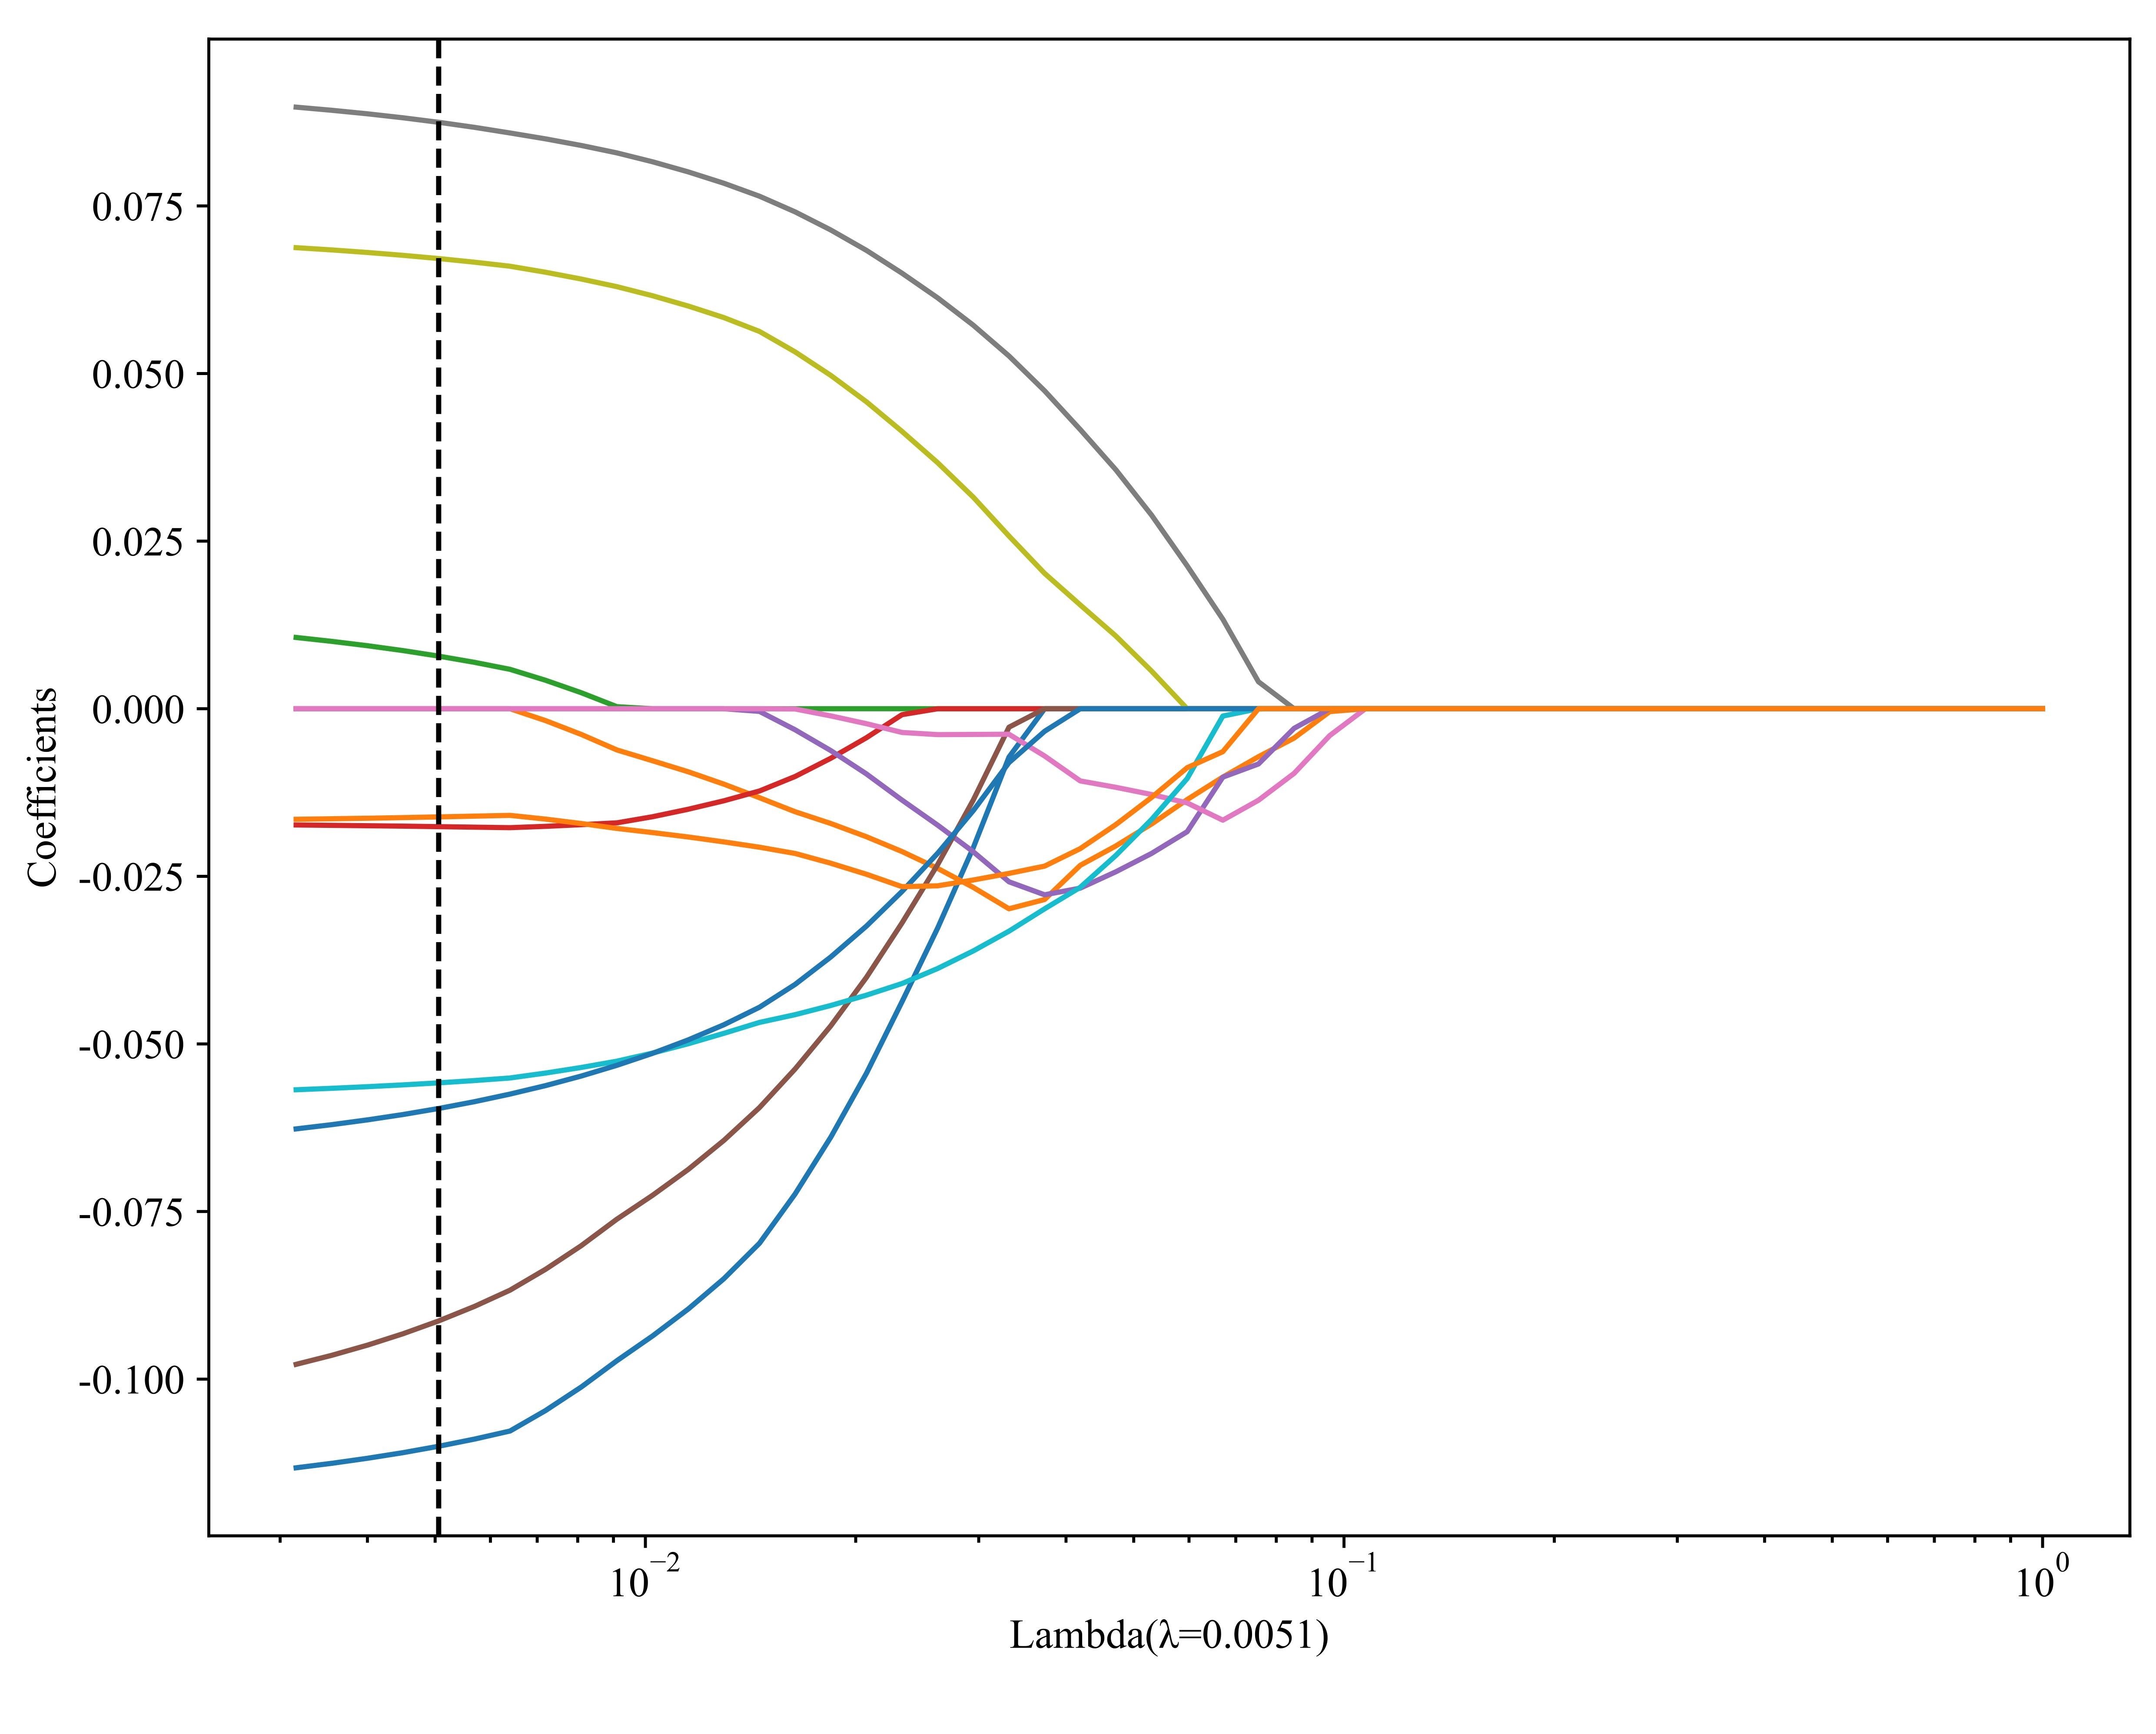


Figure S3E


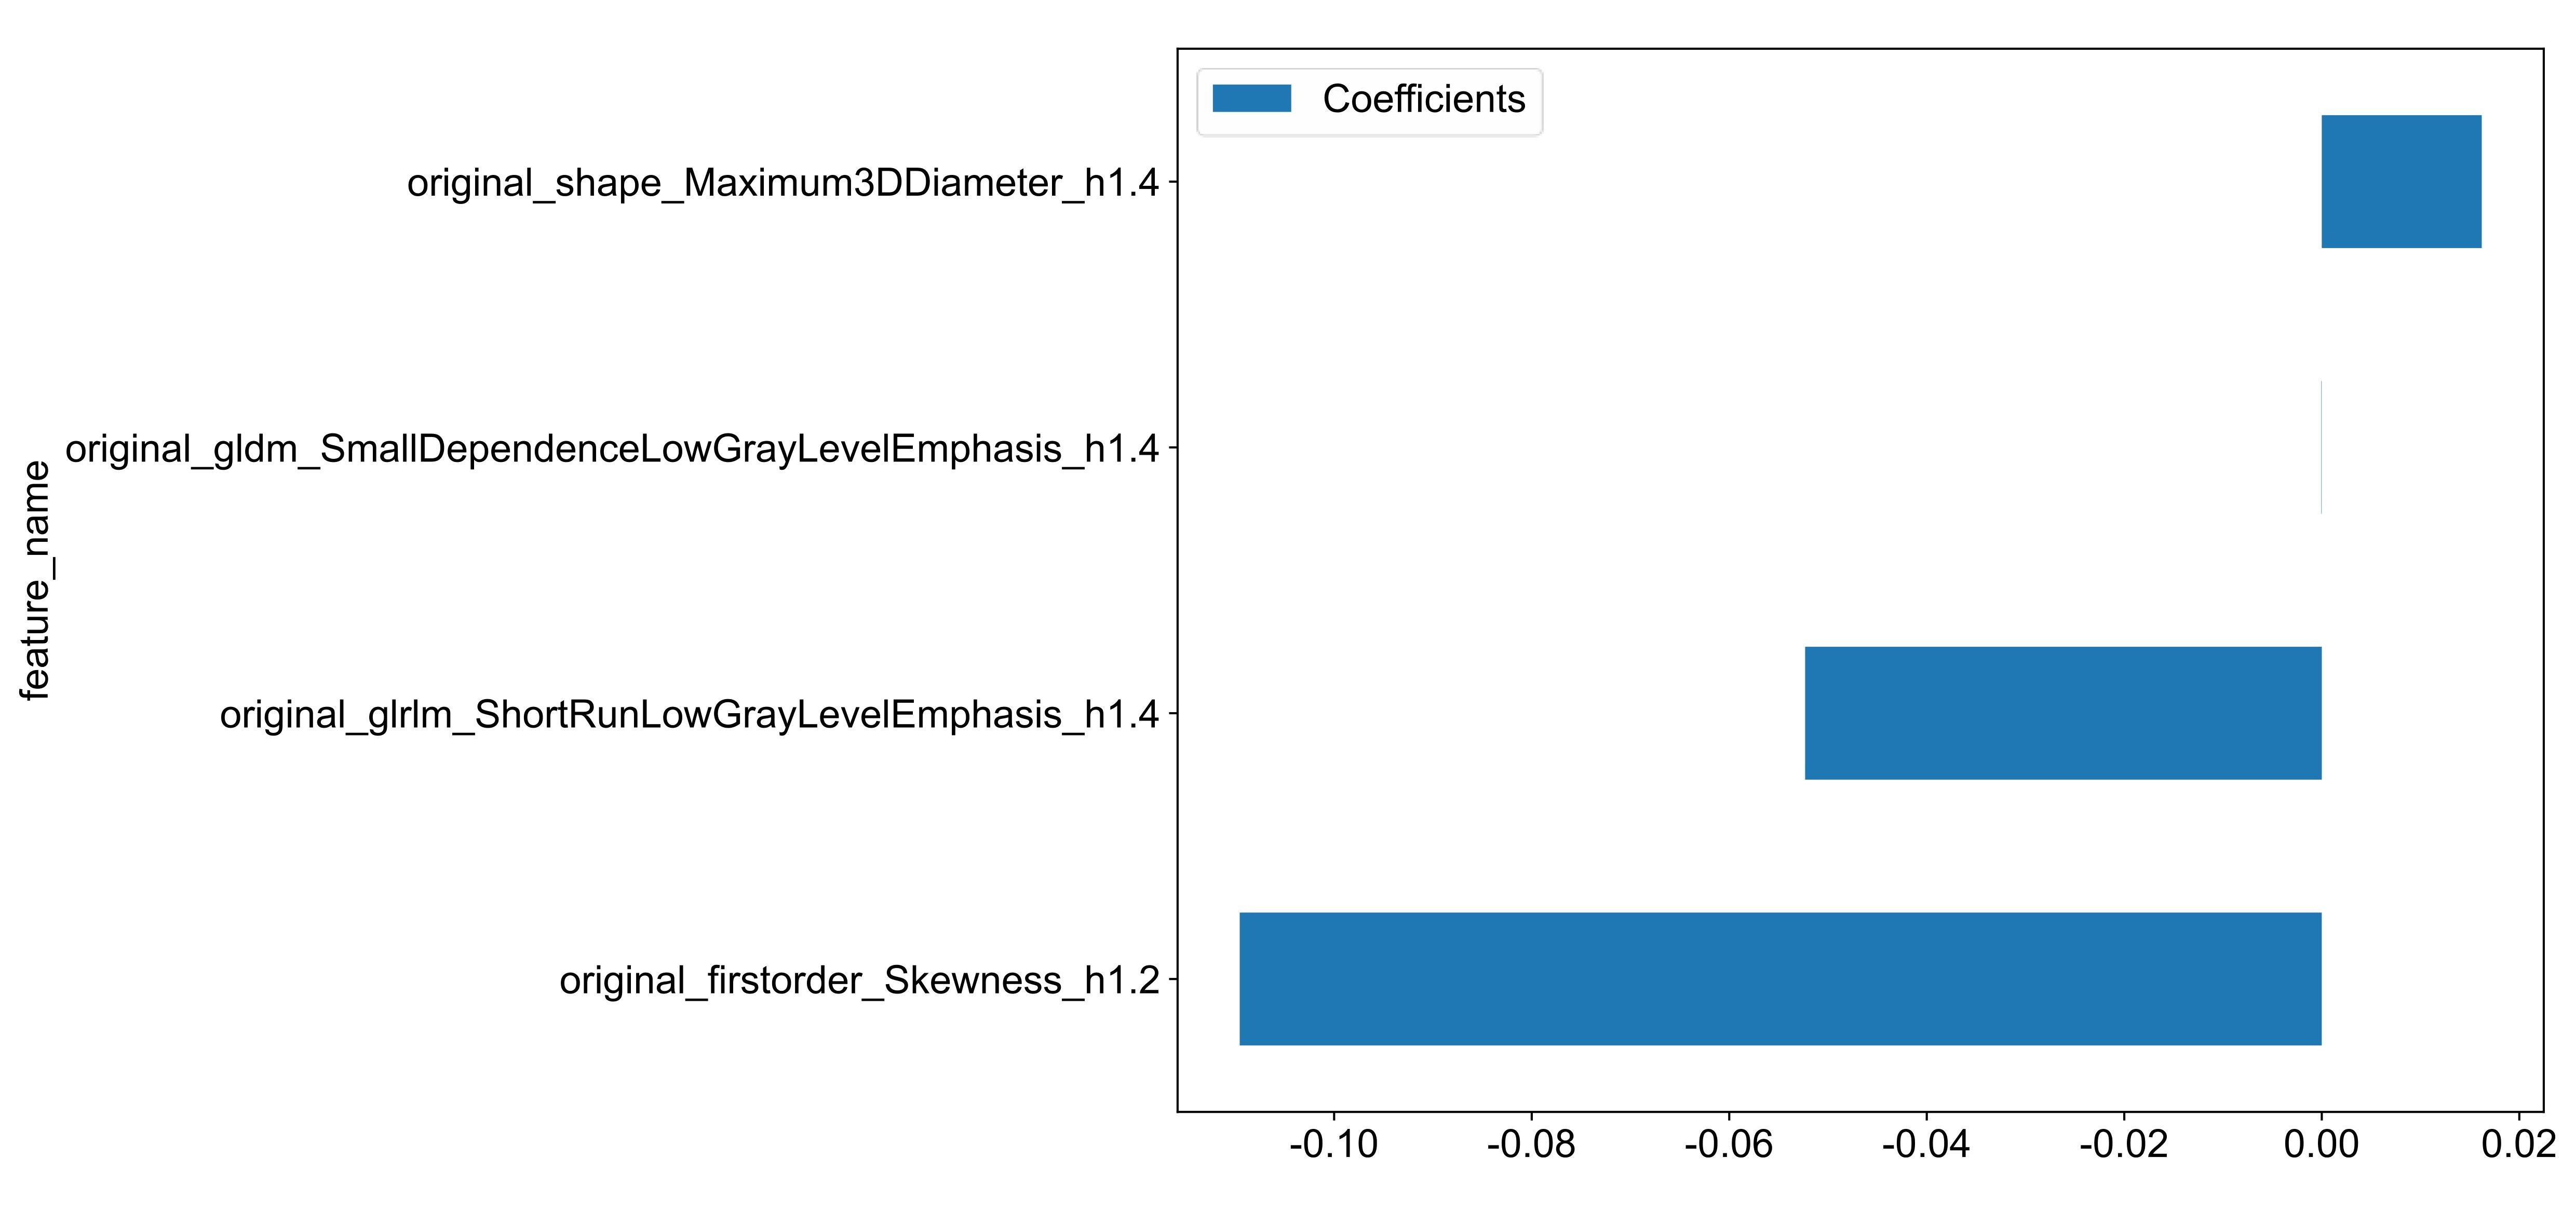


Figure S3F


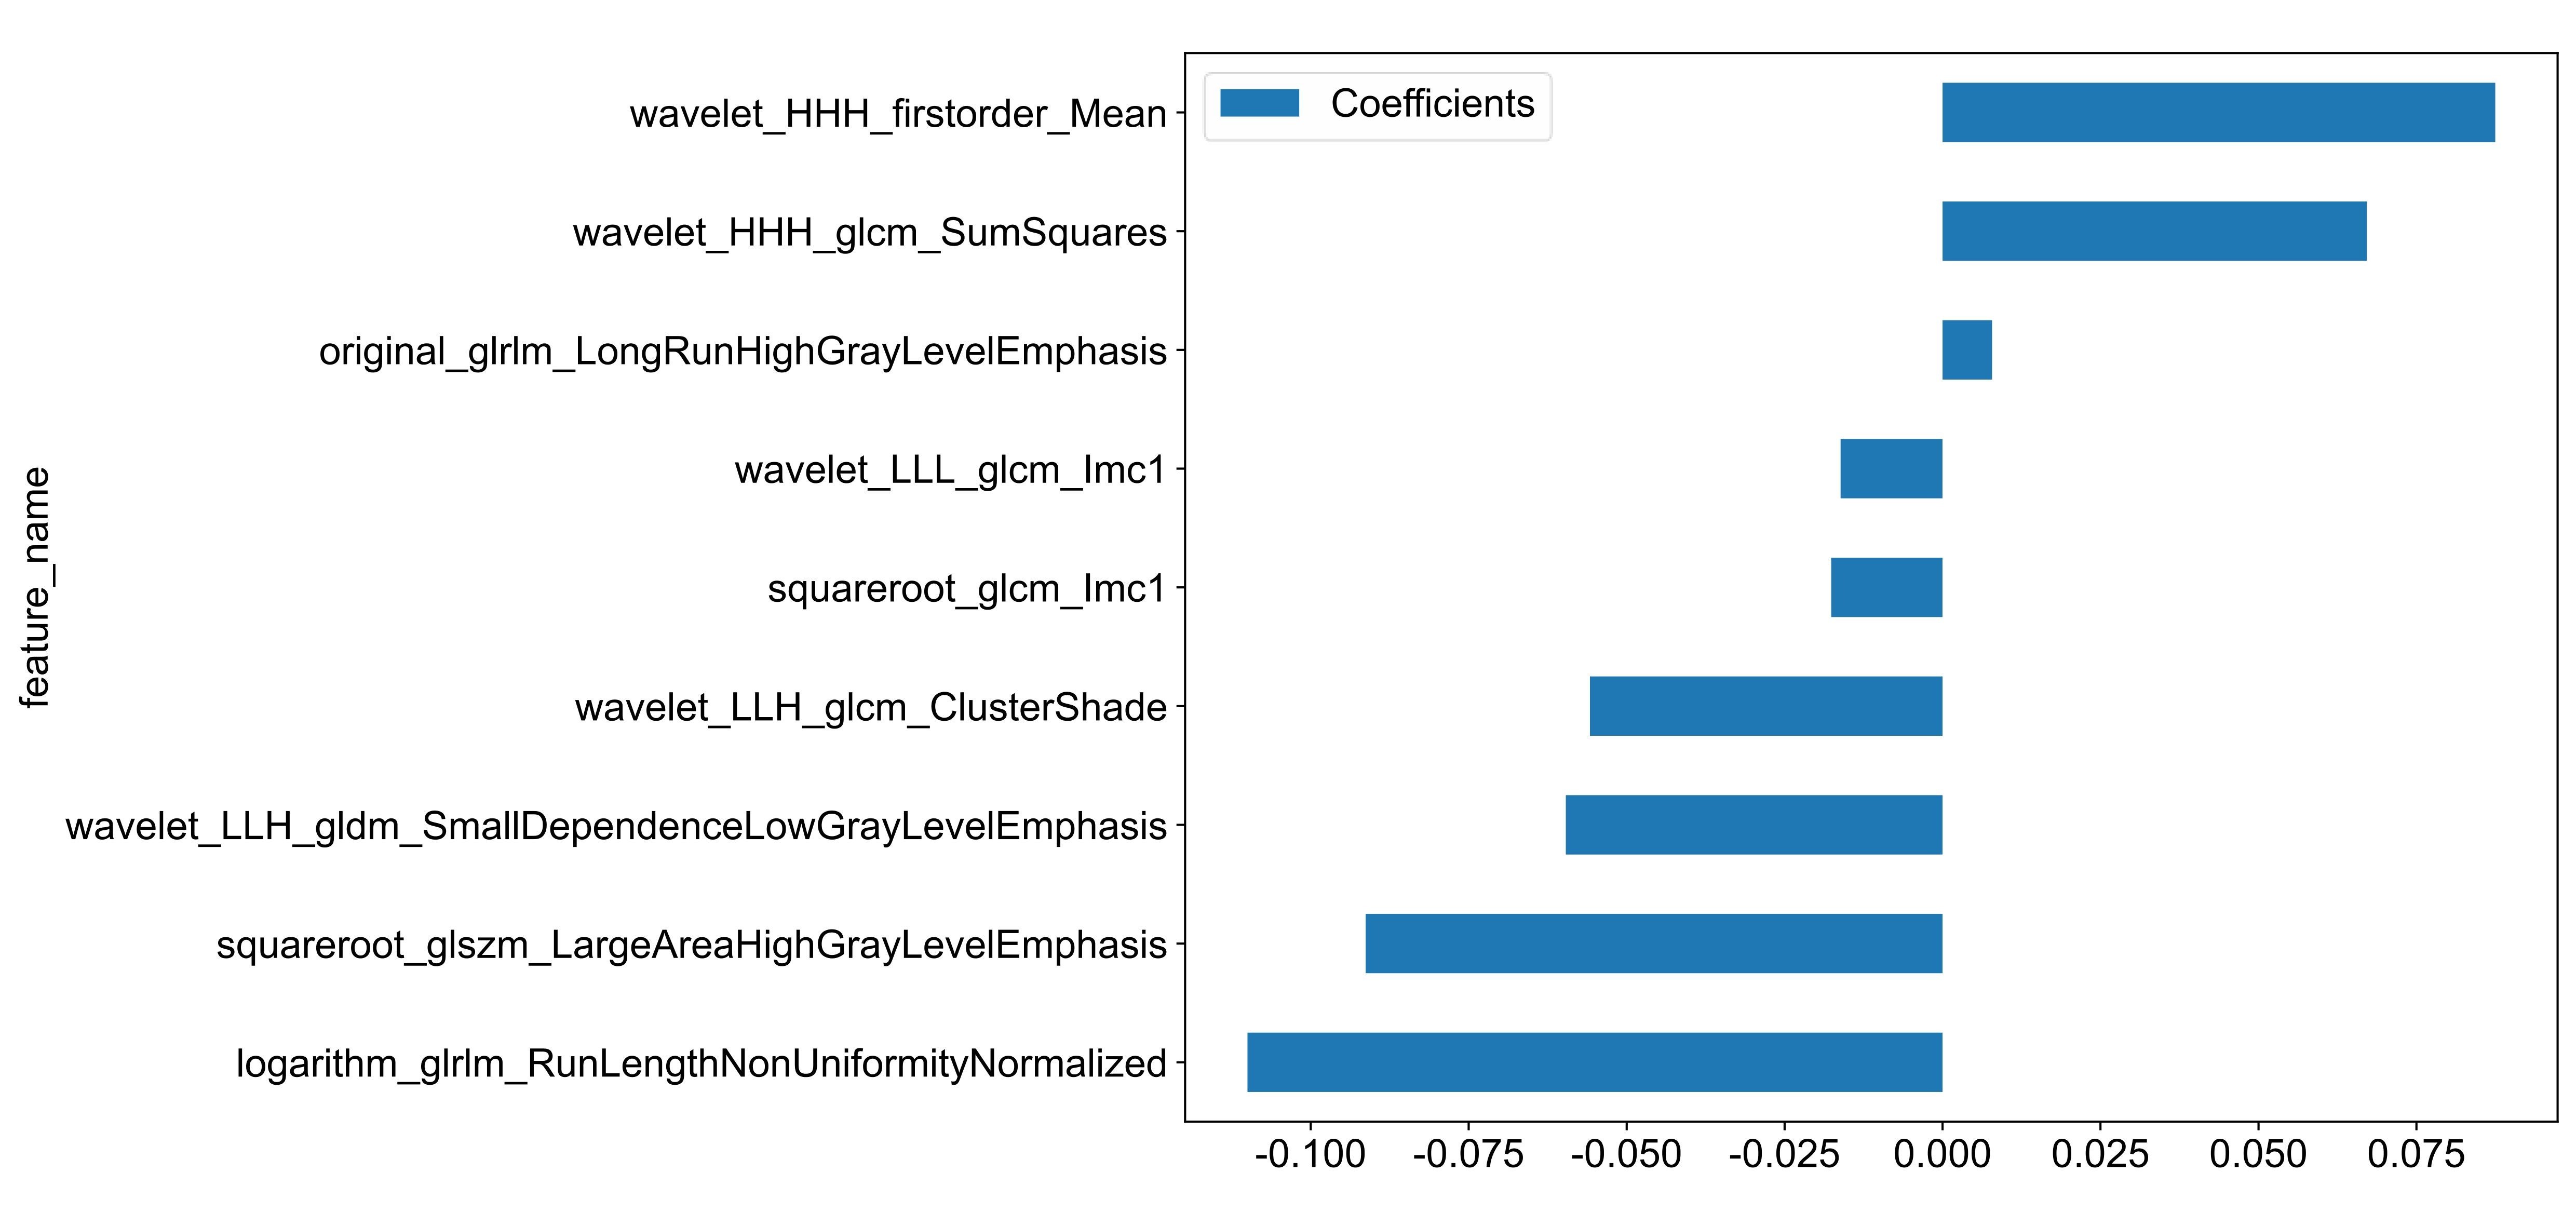


Figure S4A


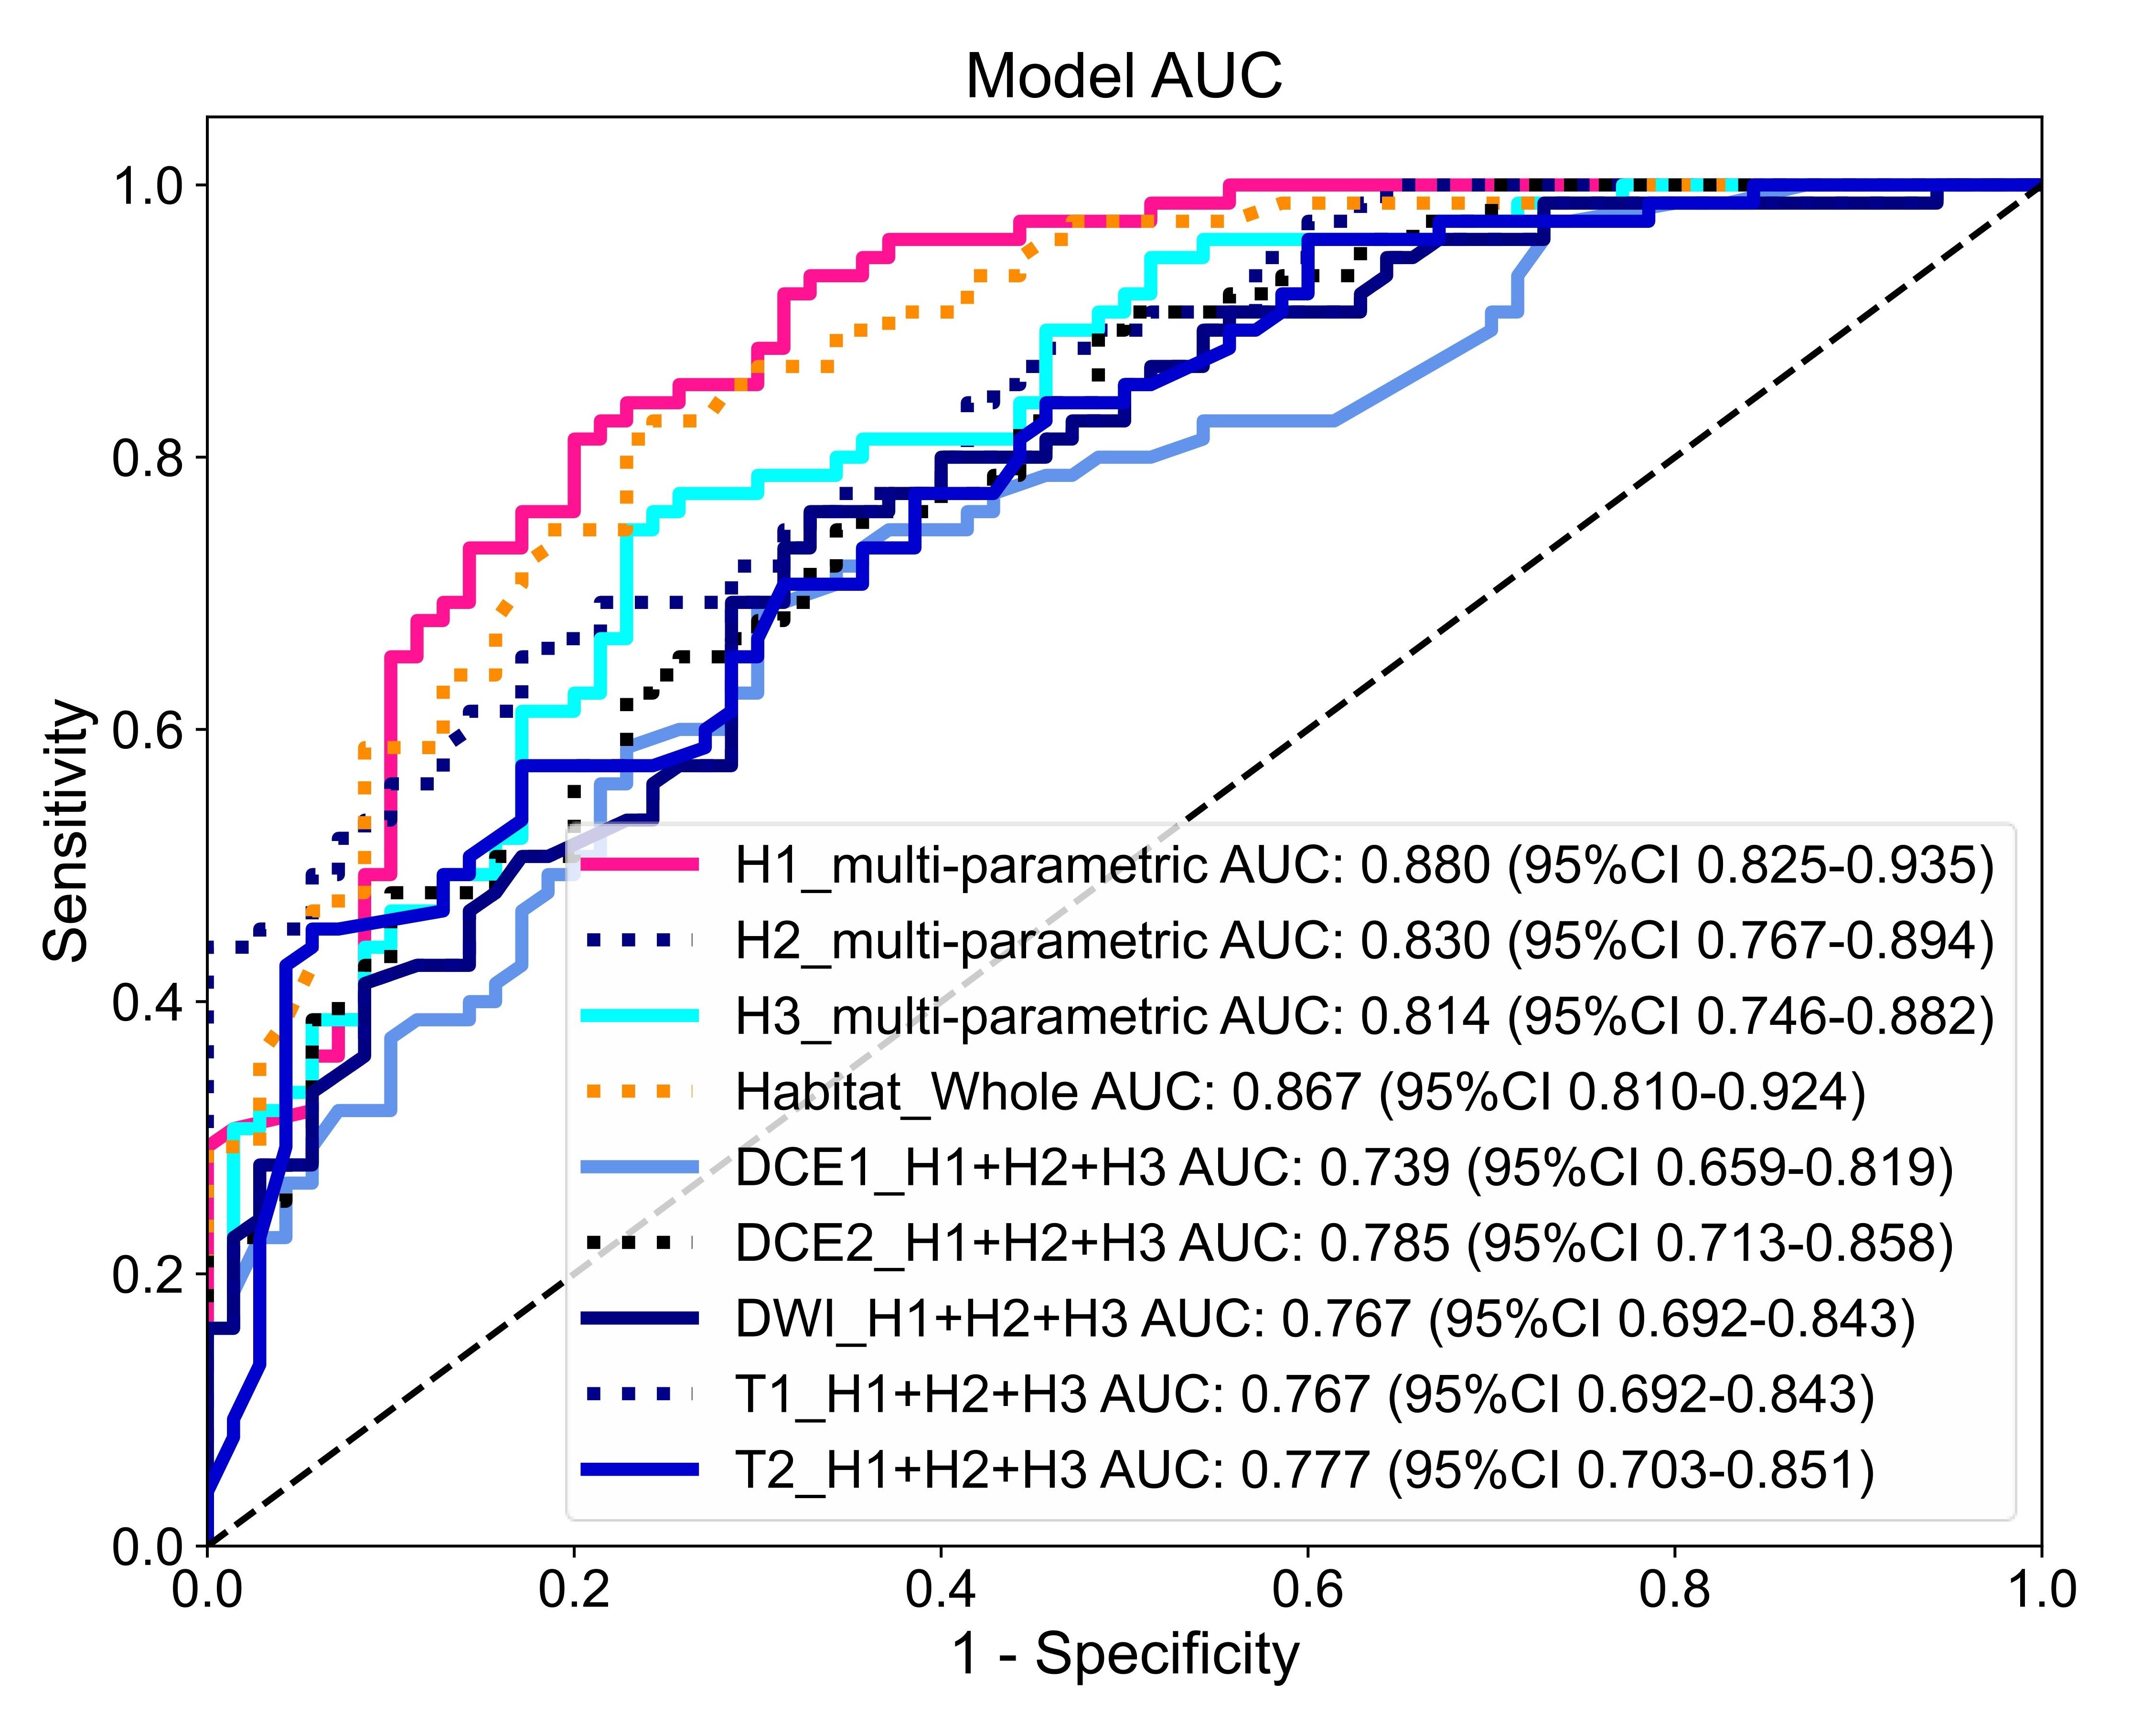


Figure S4B


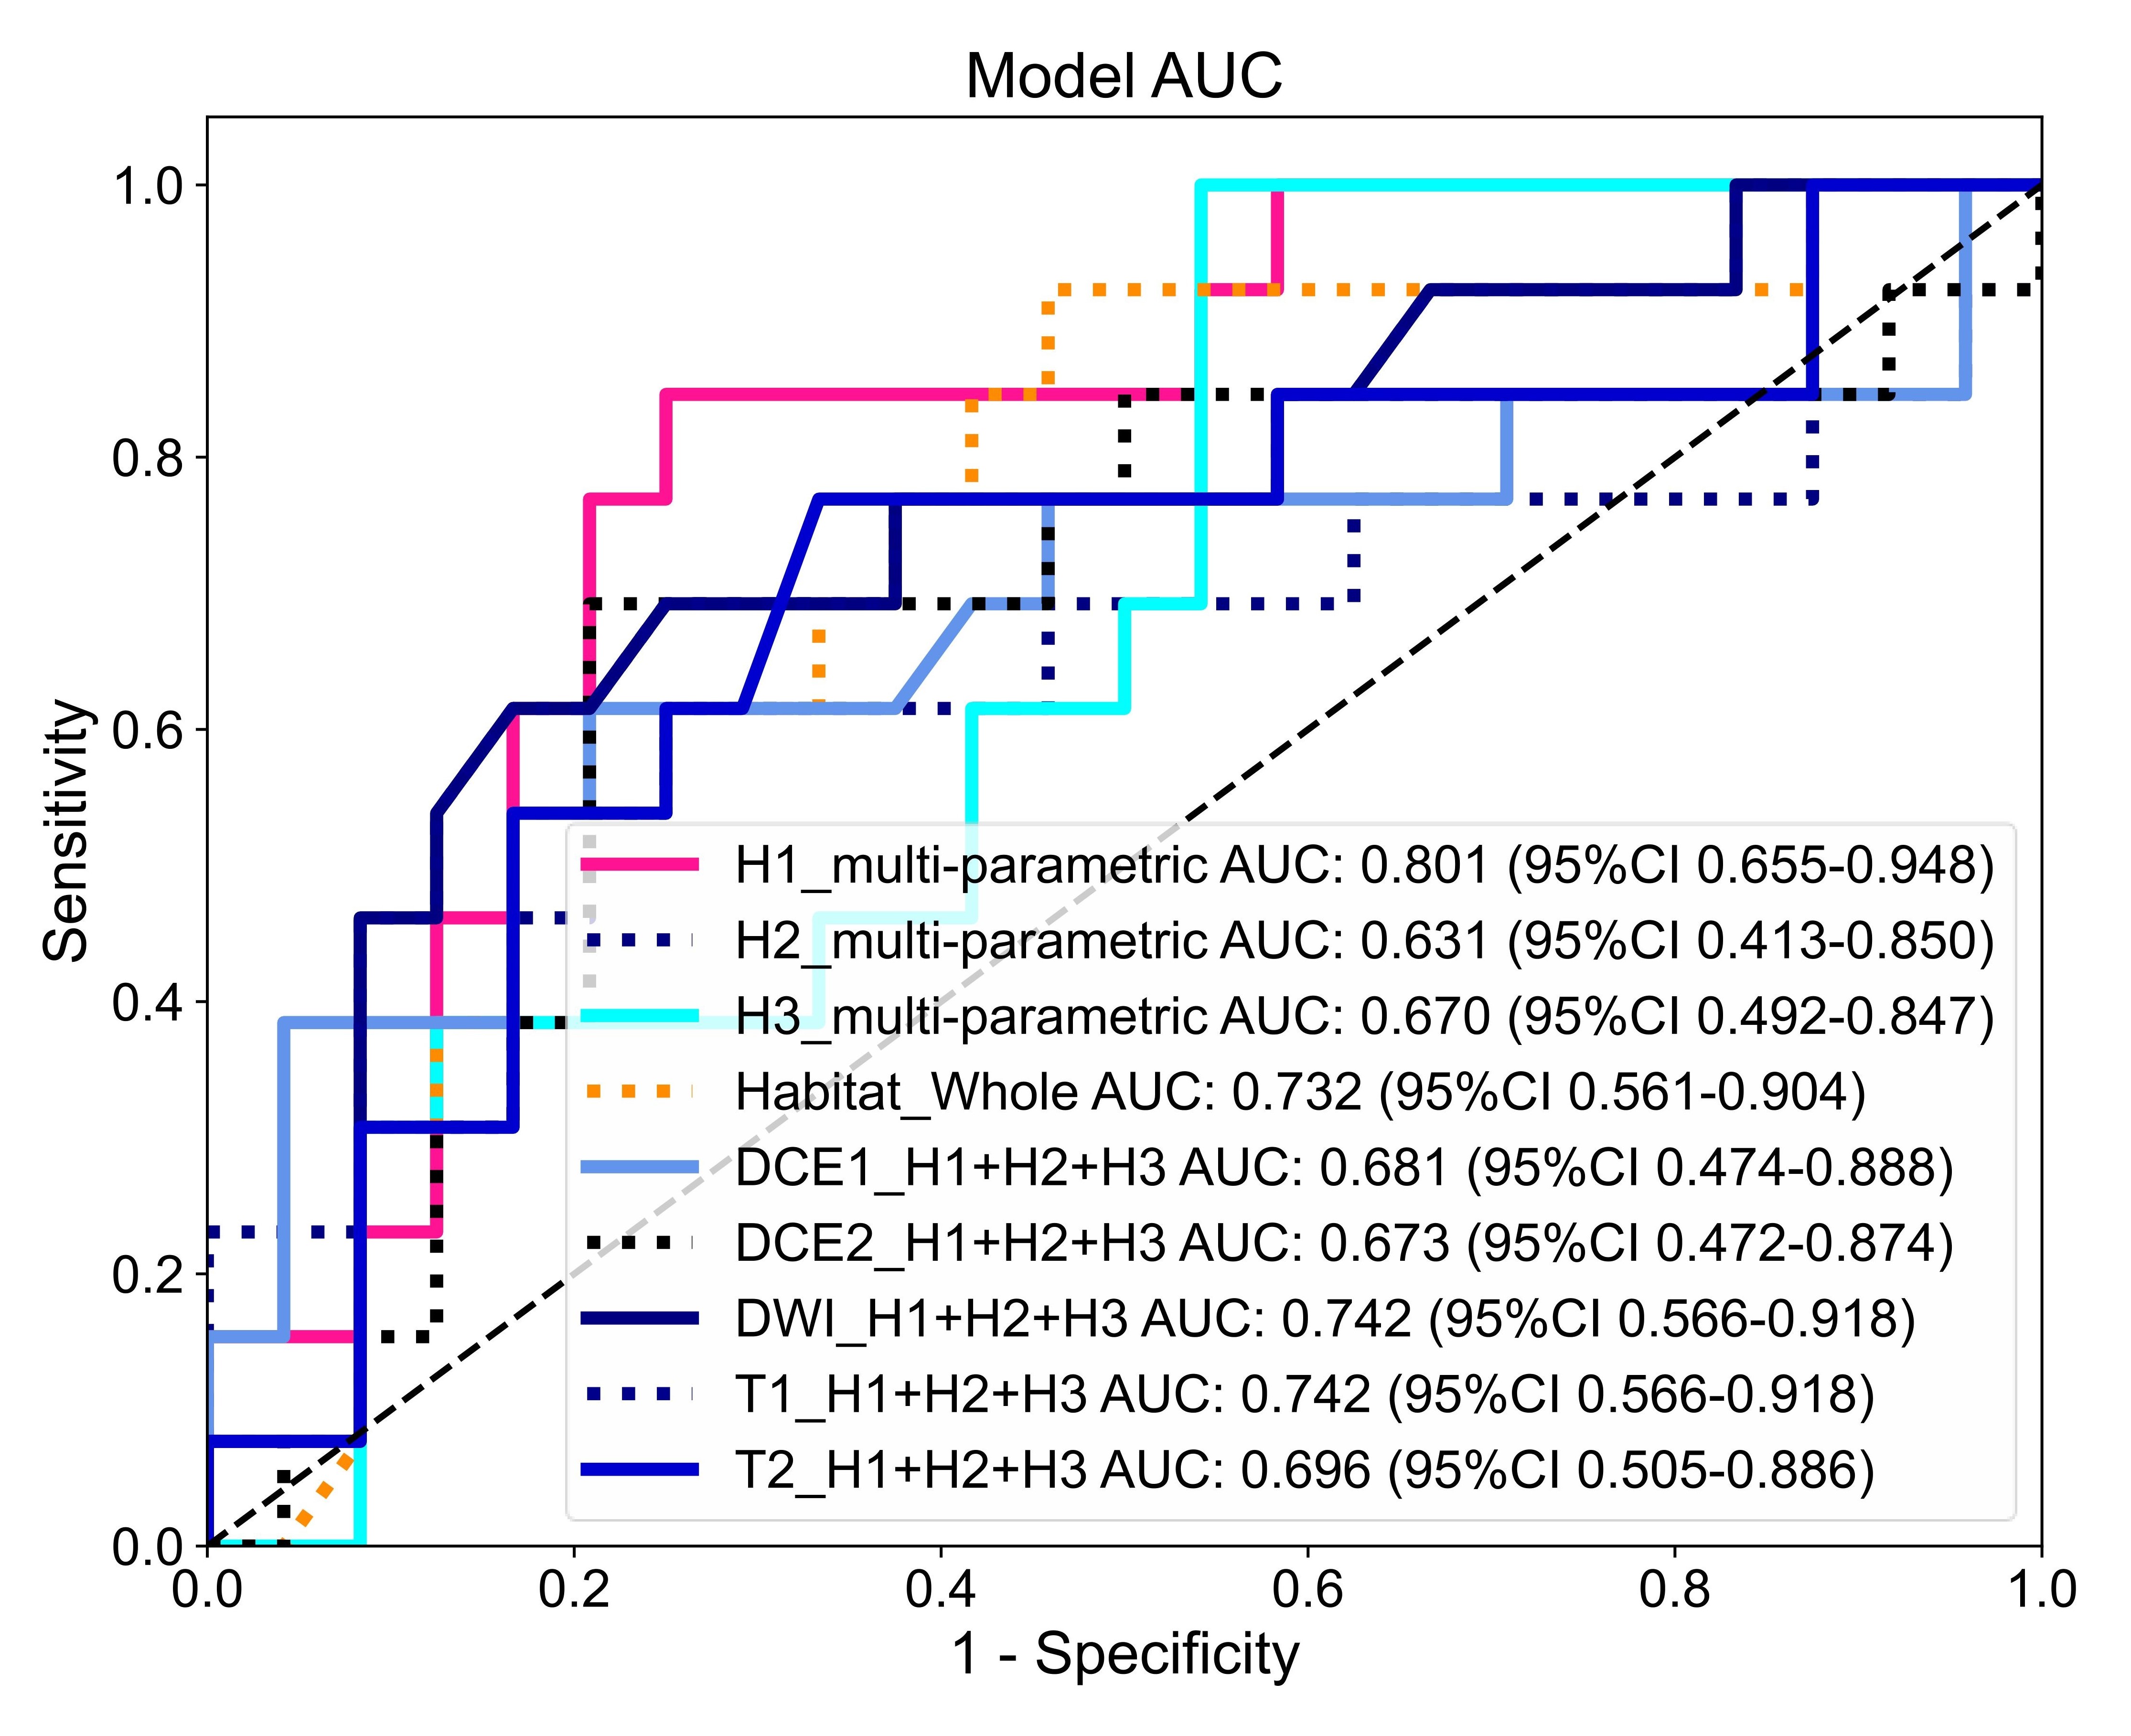


Figure S4C


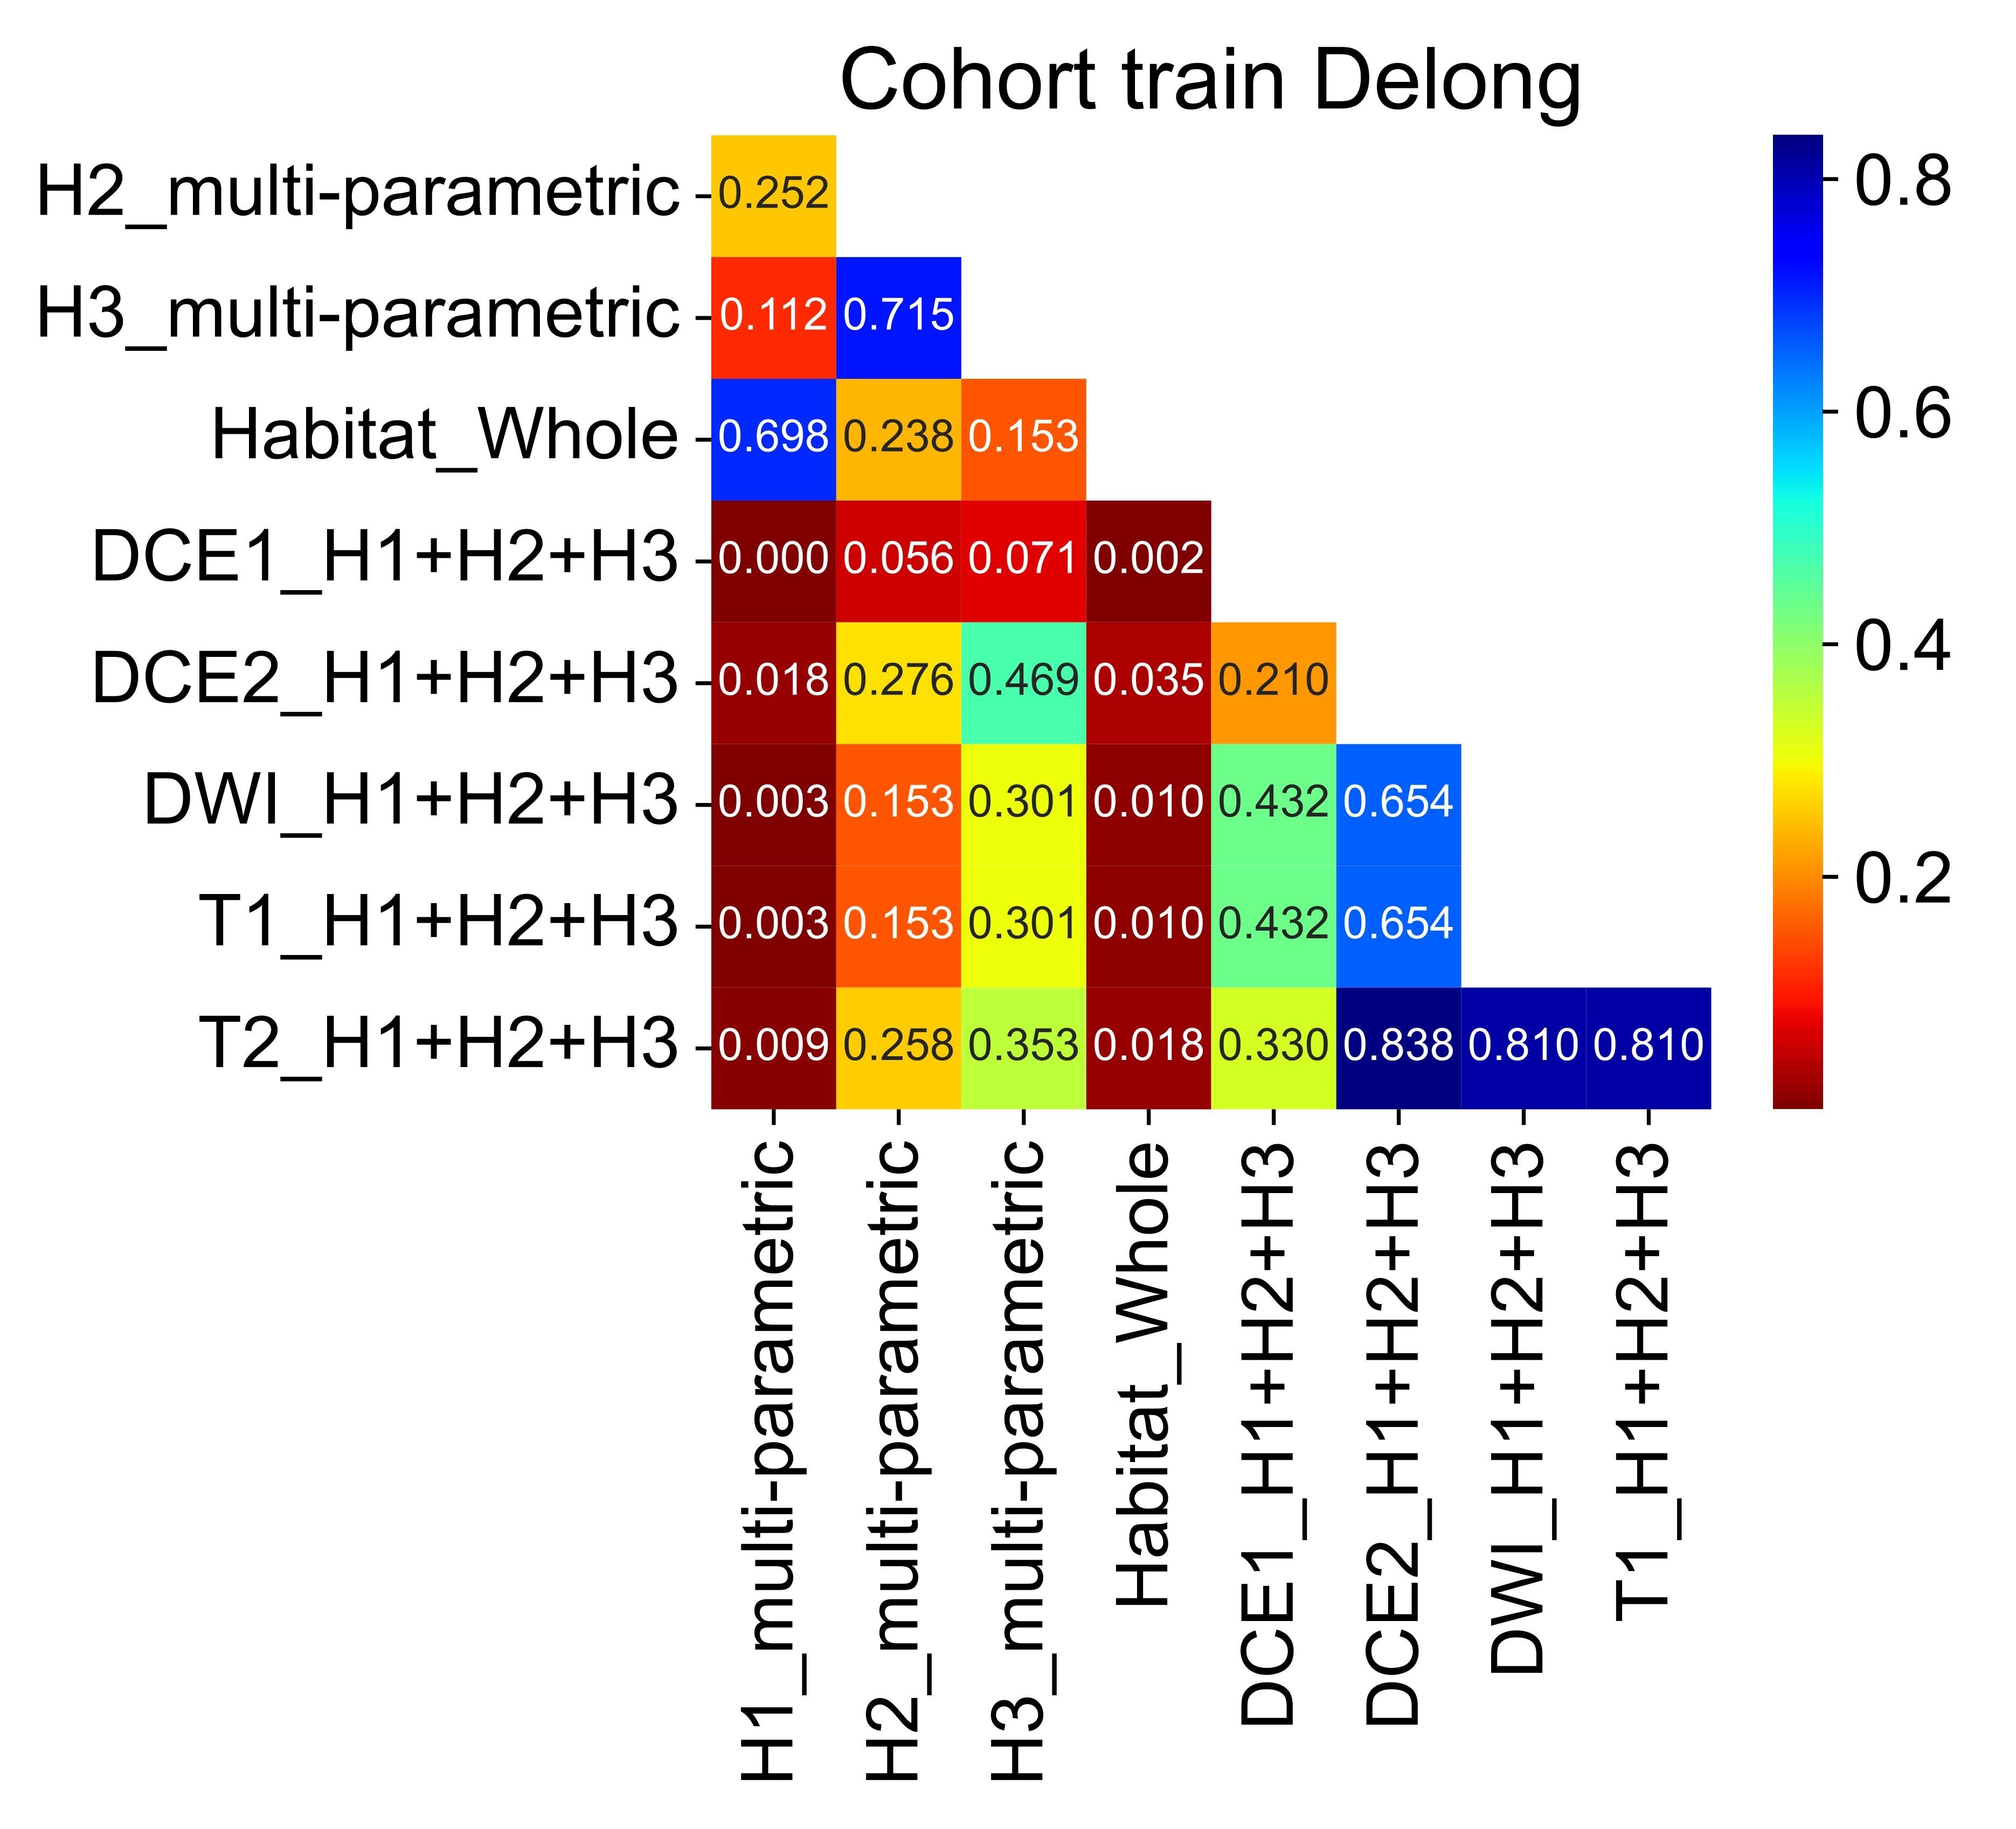


Figure S4D


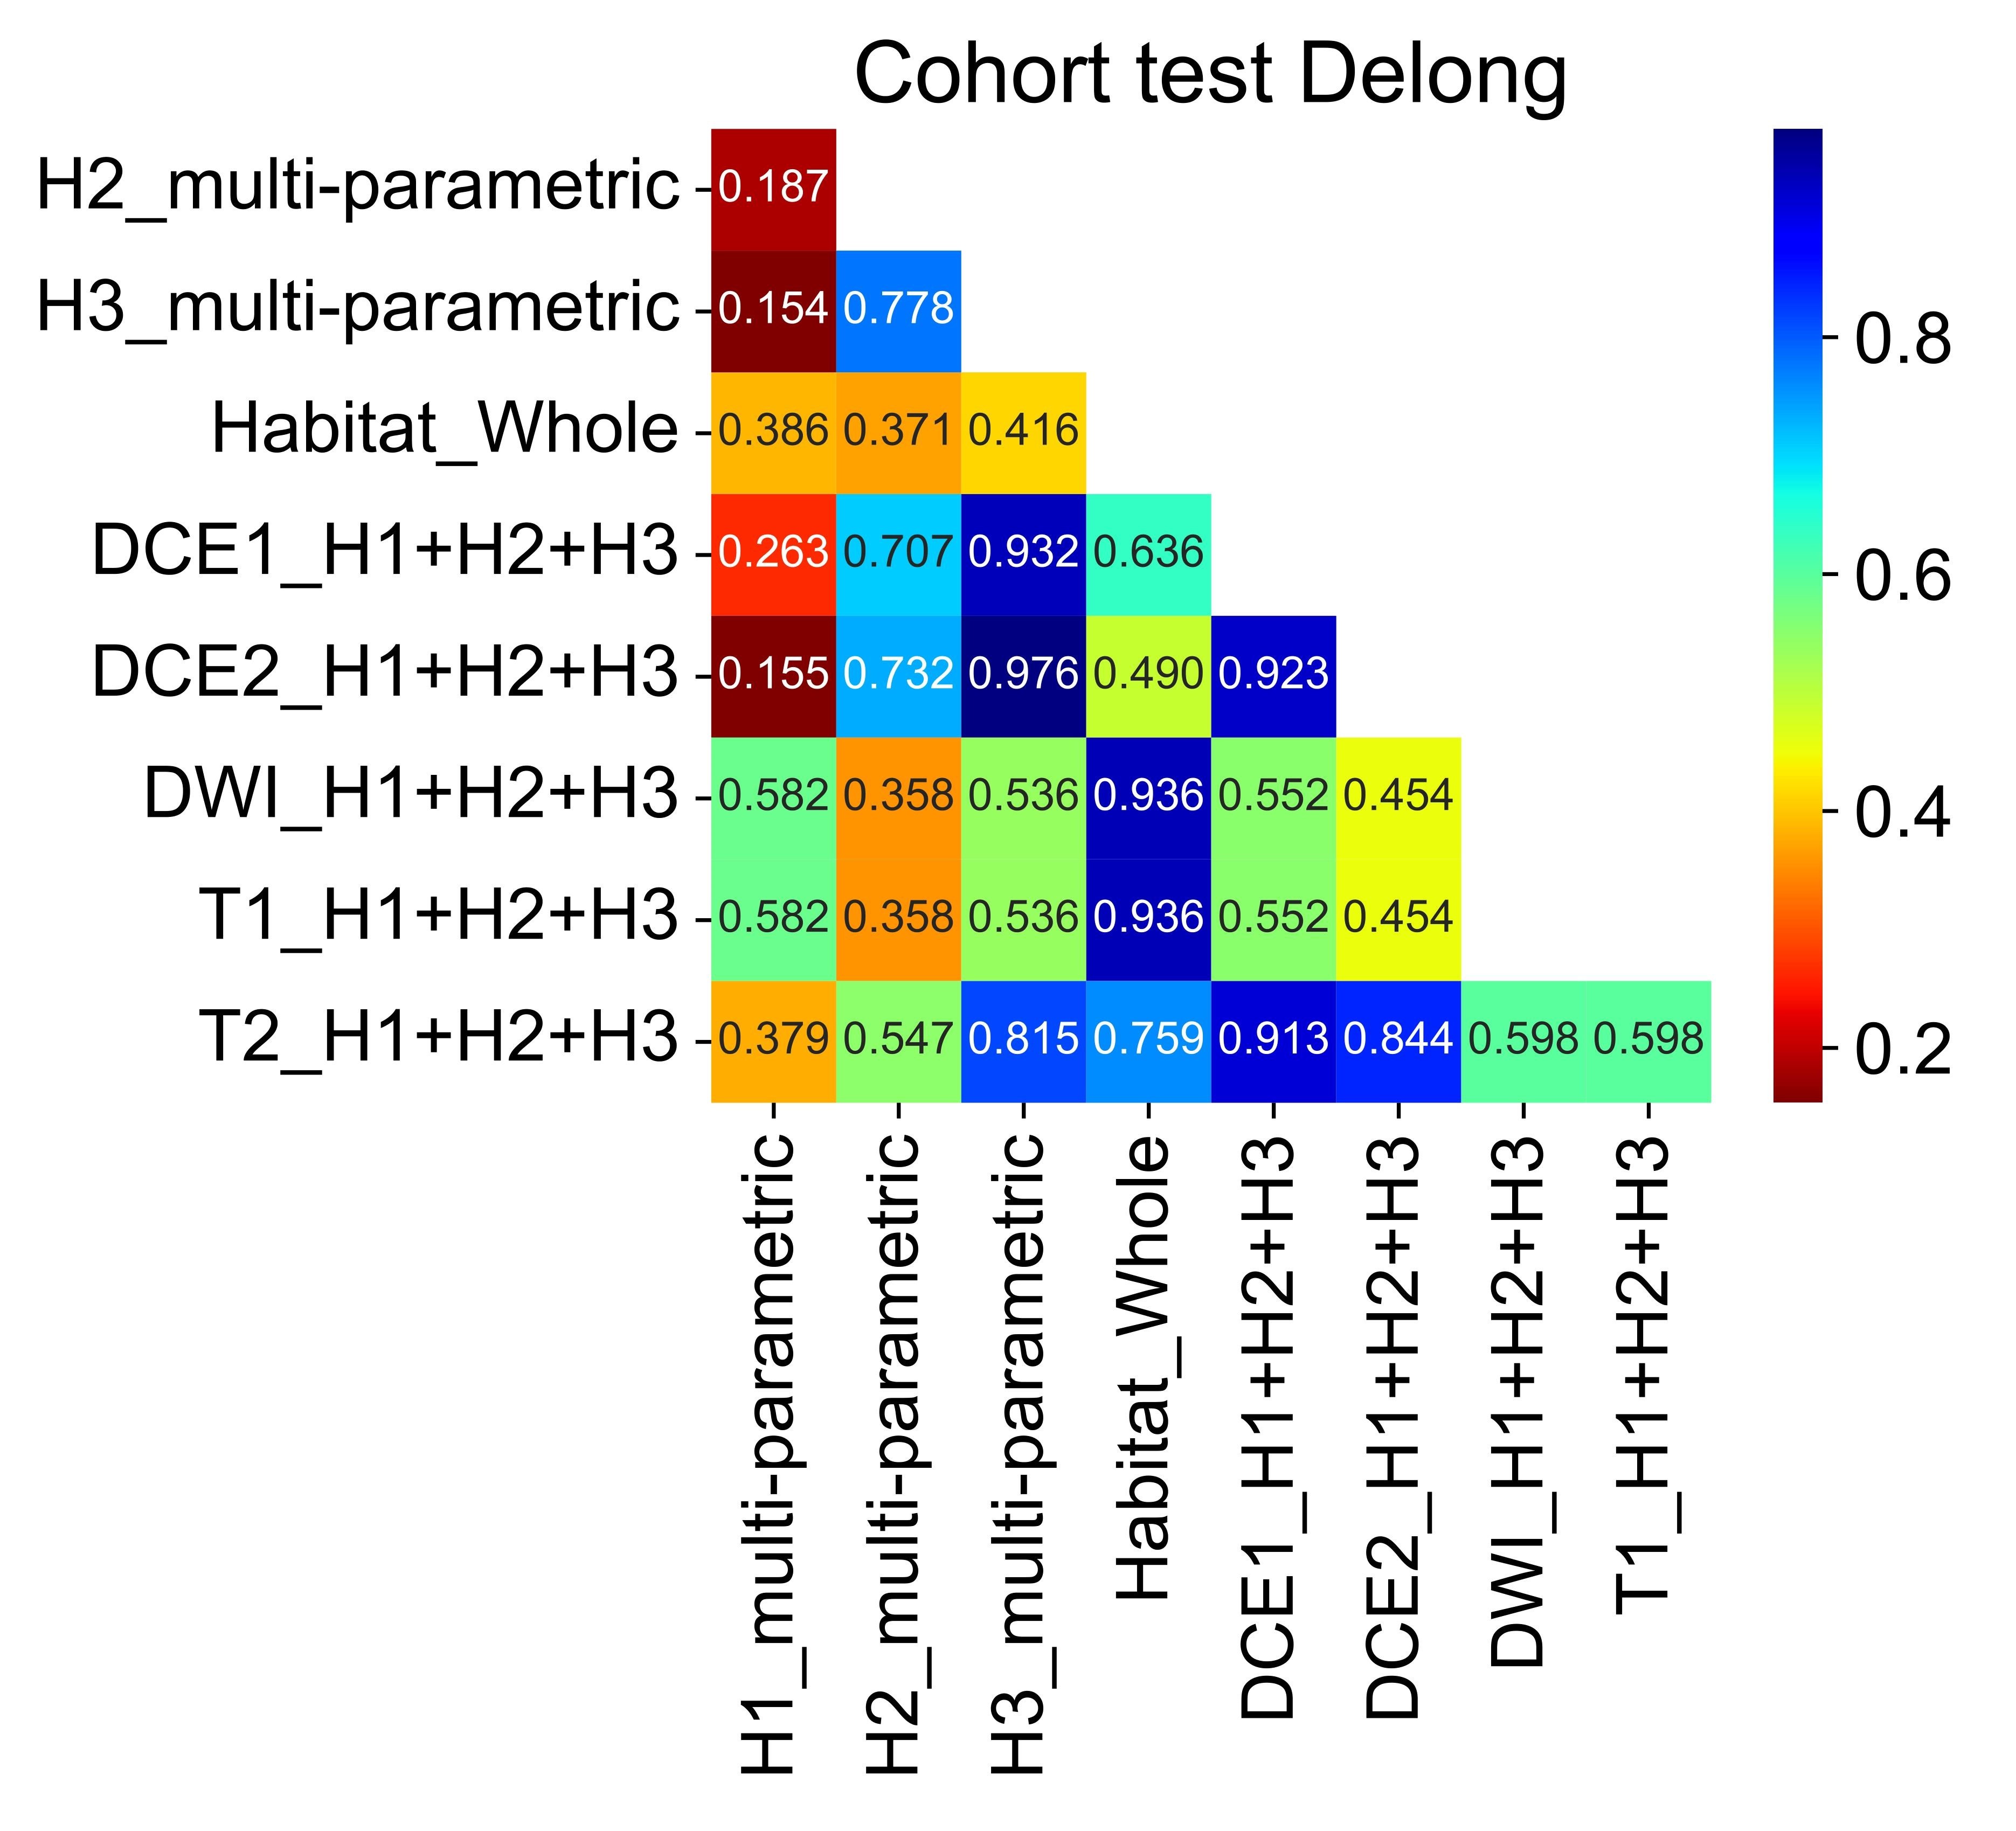


Figure S5
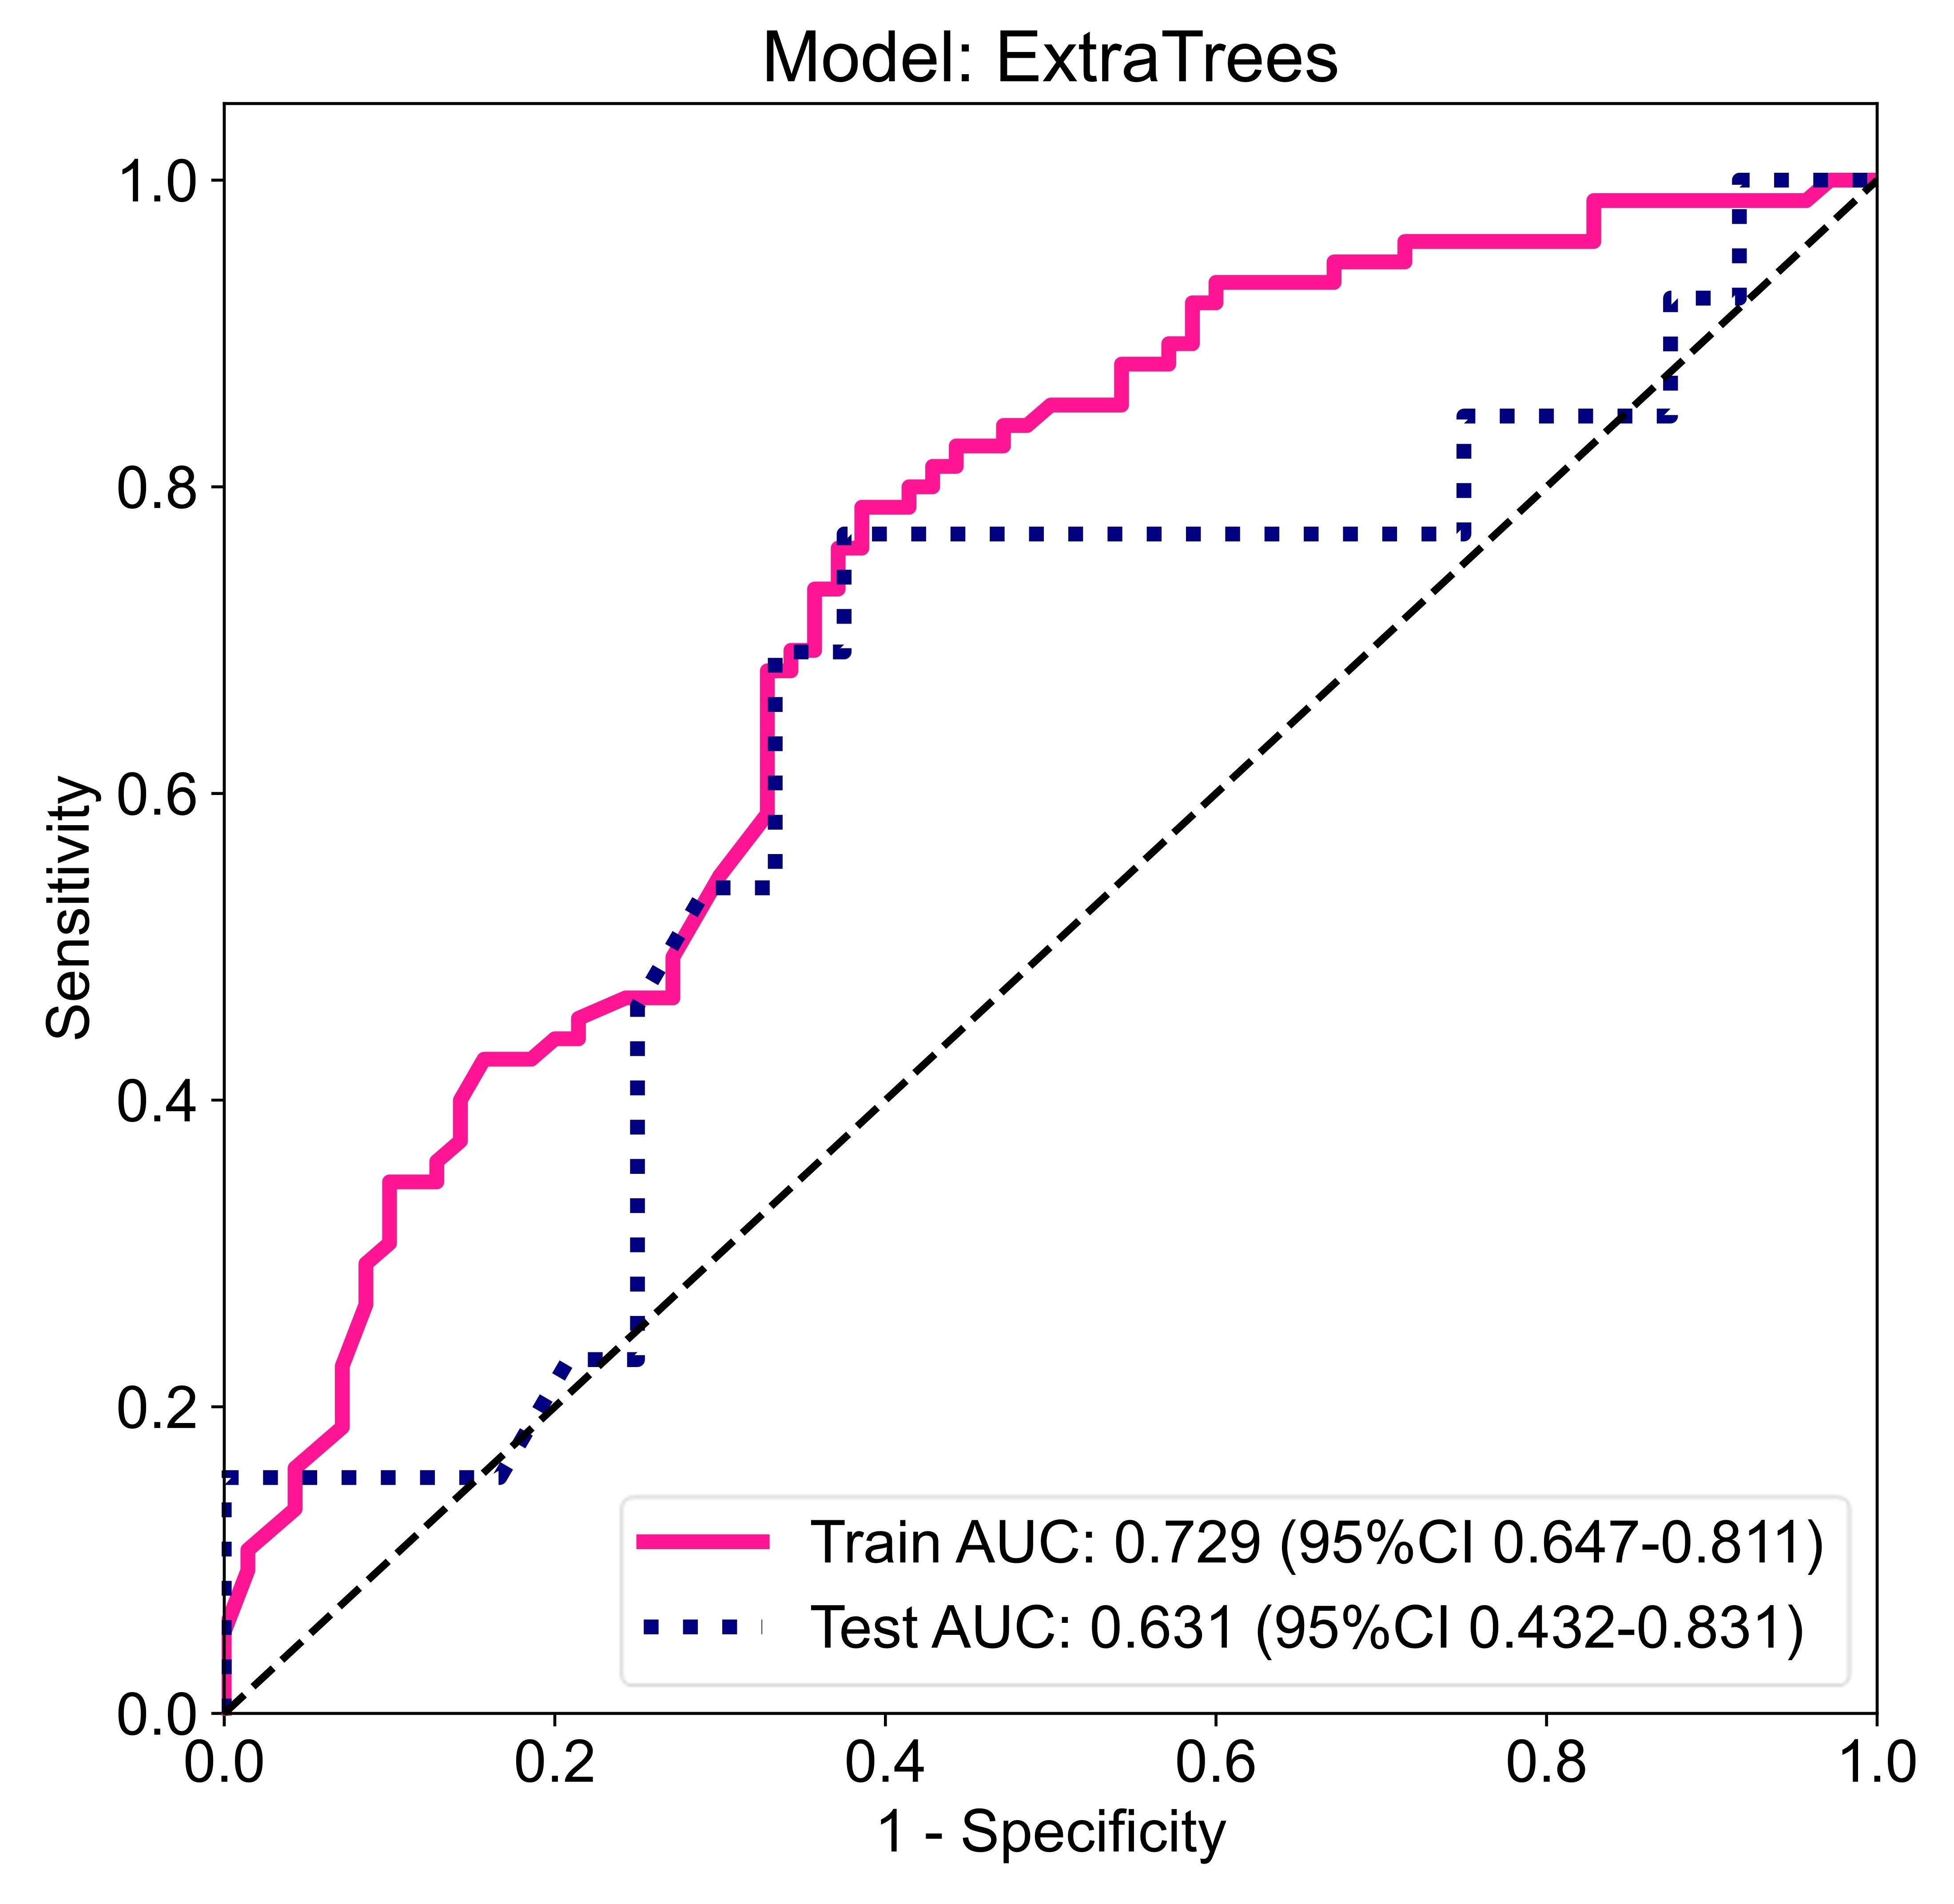


Figure S6A


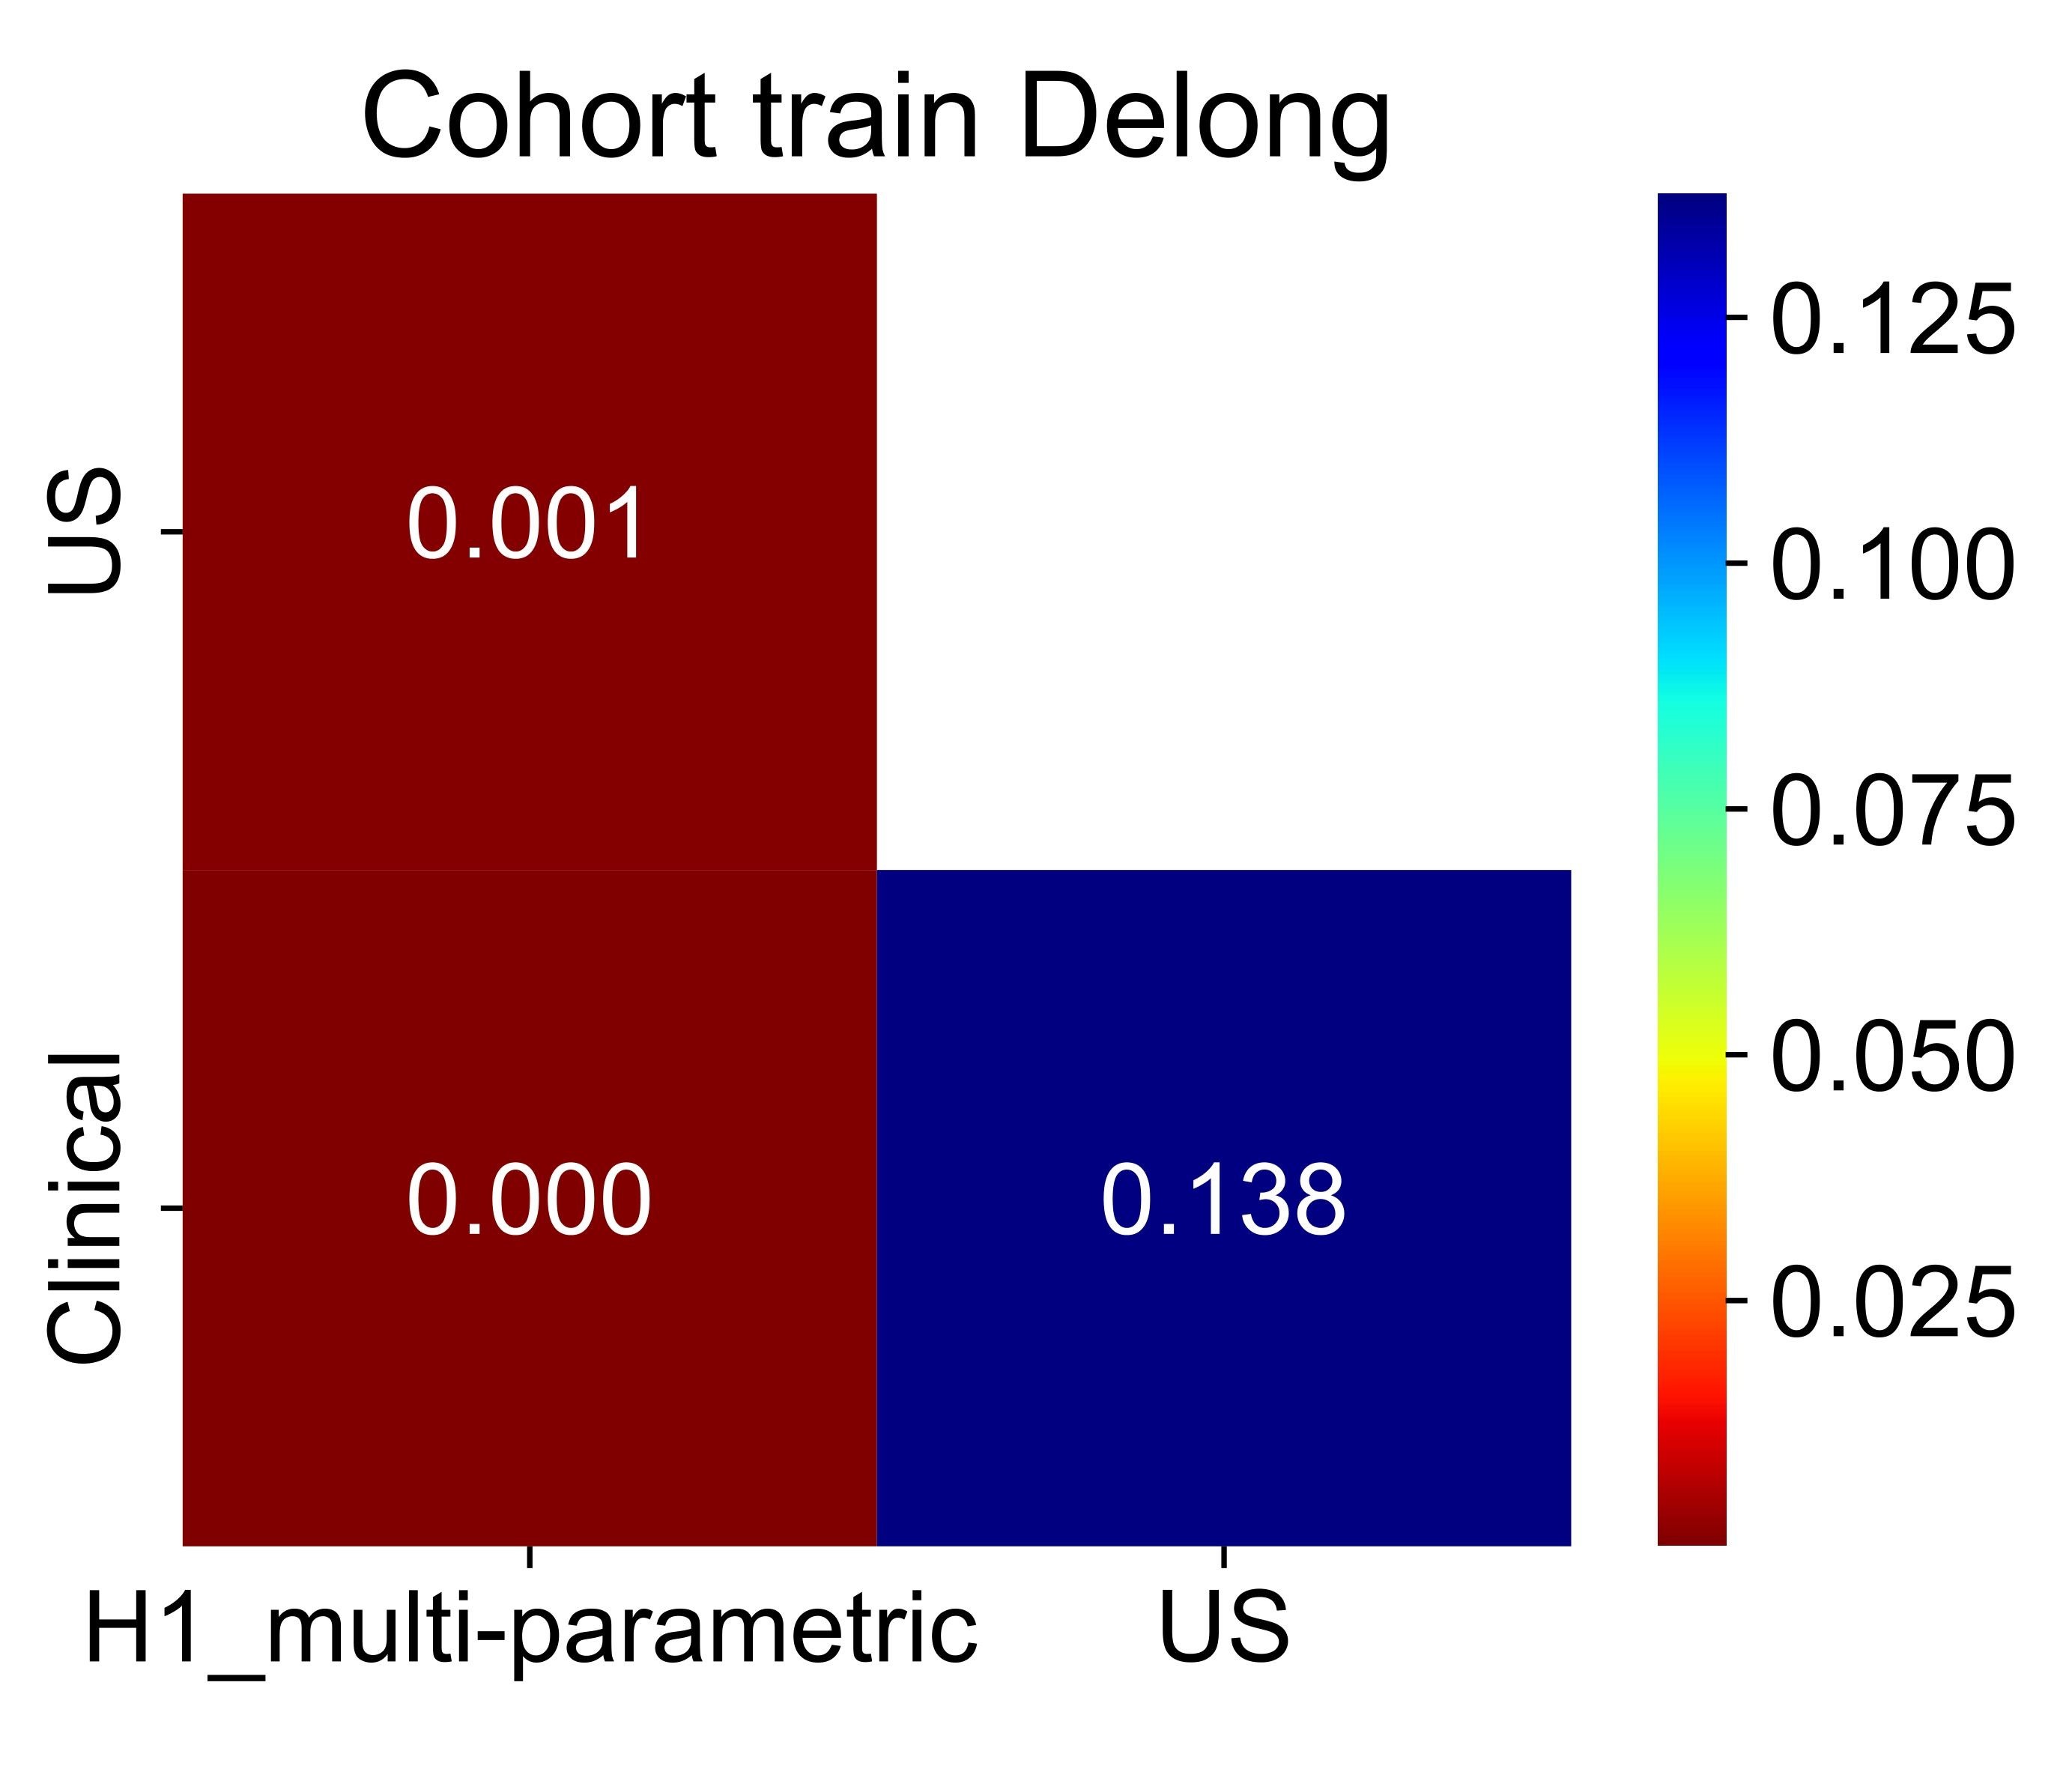


Figure S6B


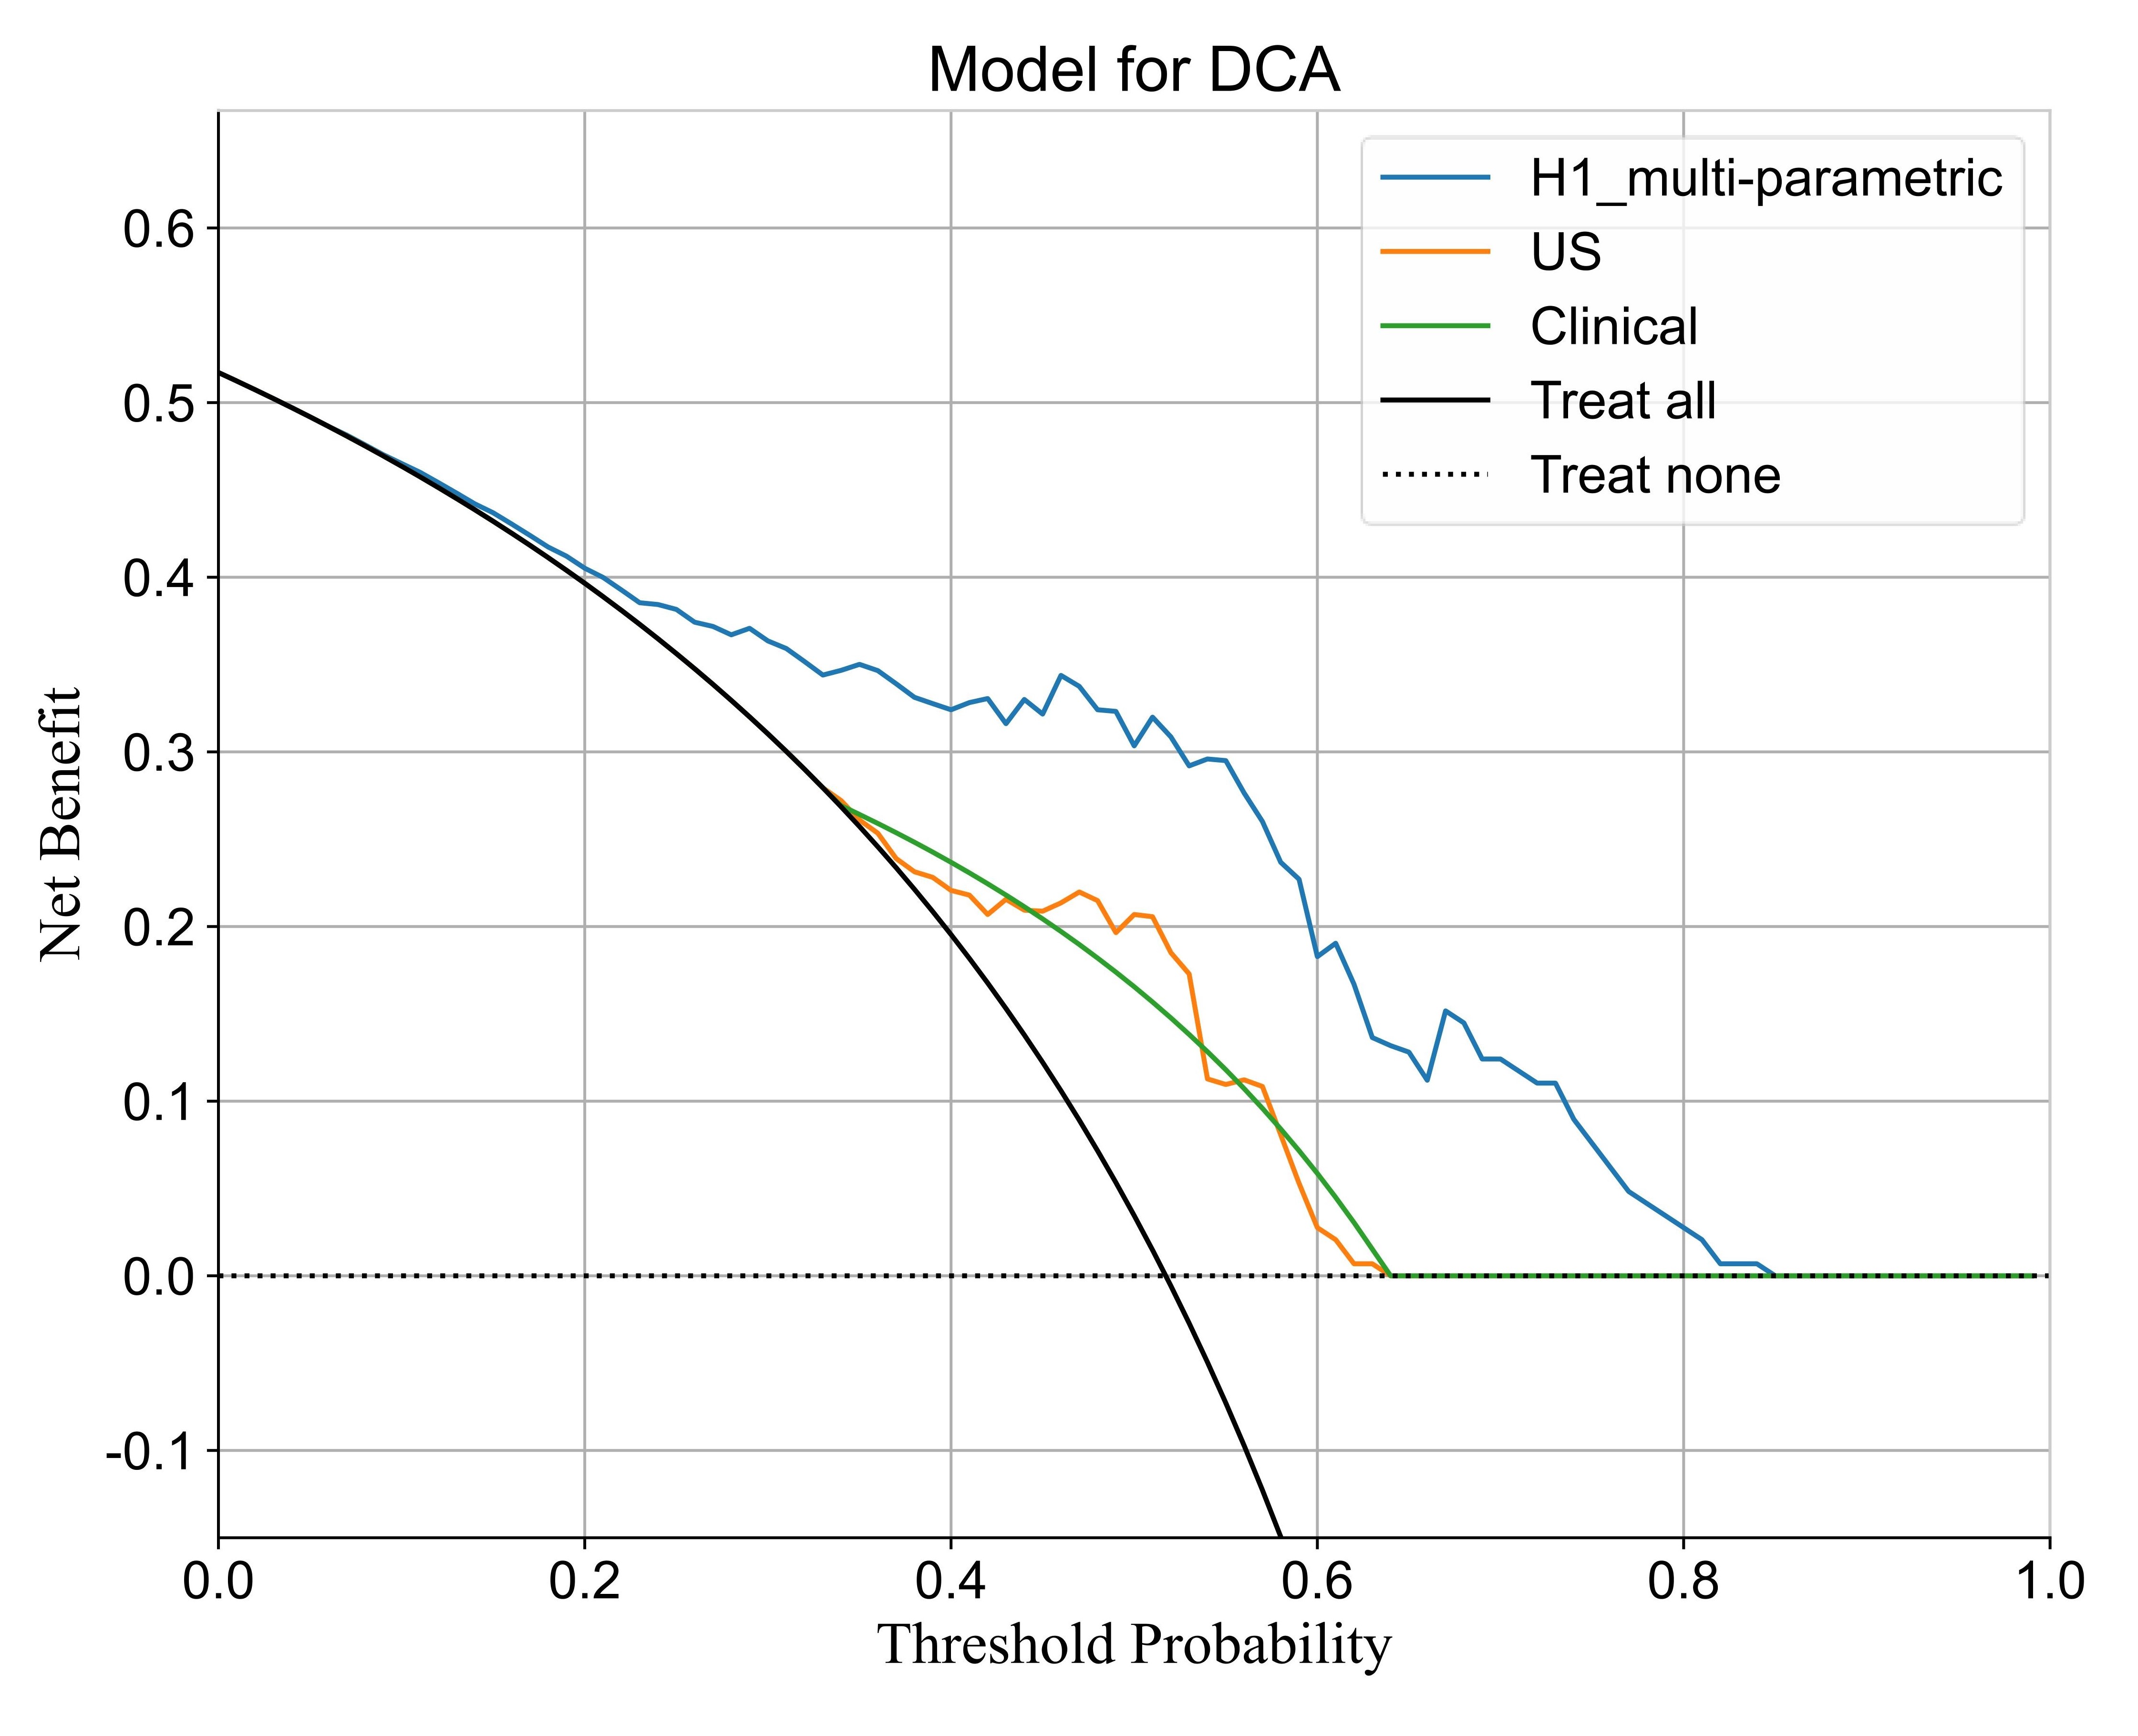


Figure S6C


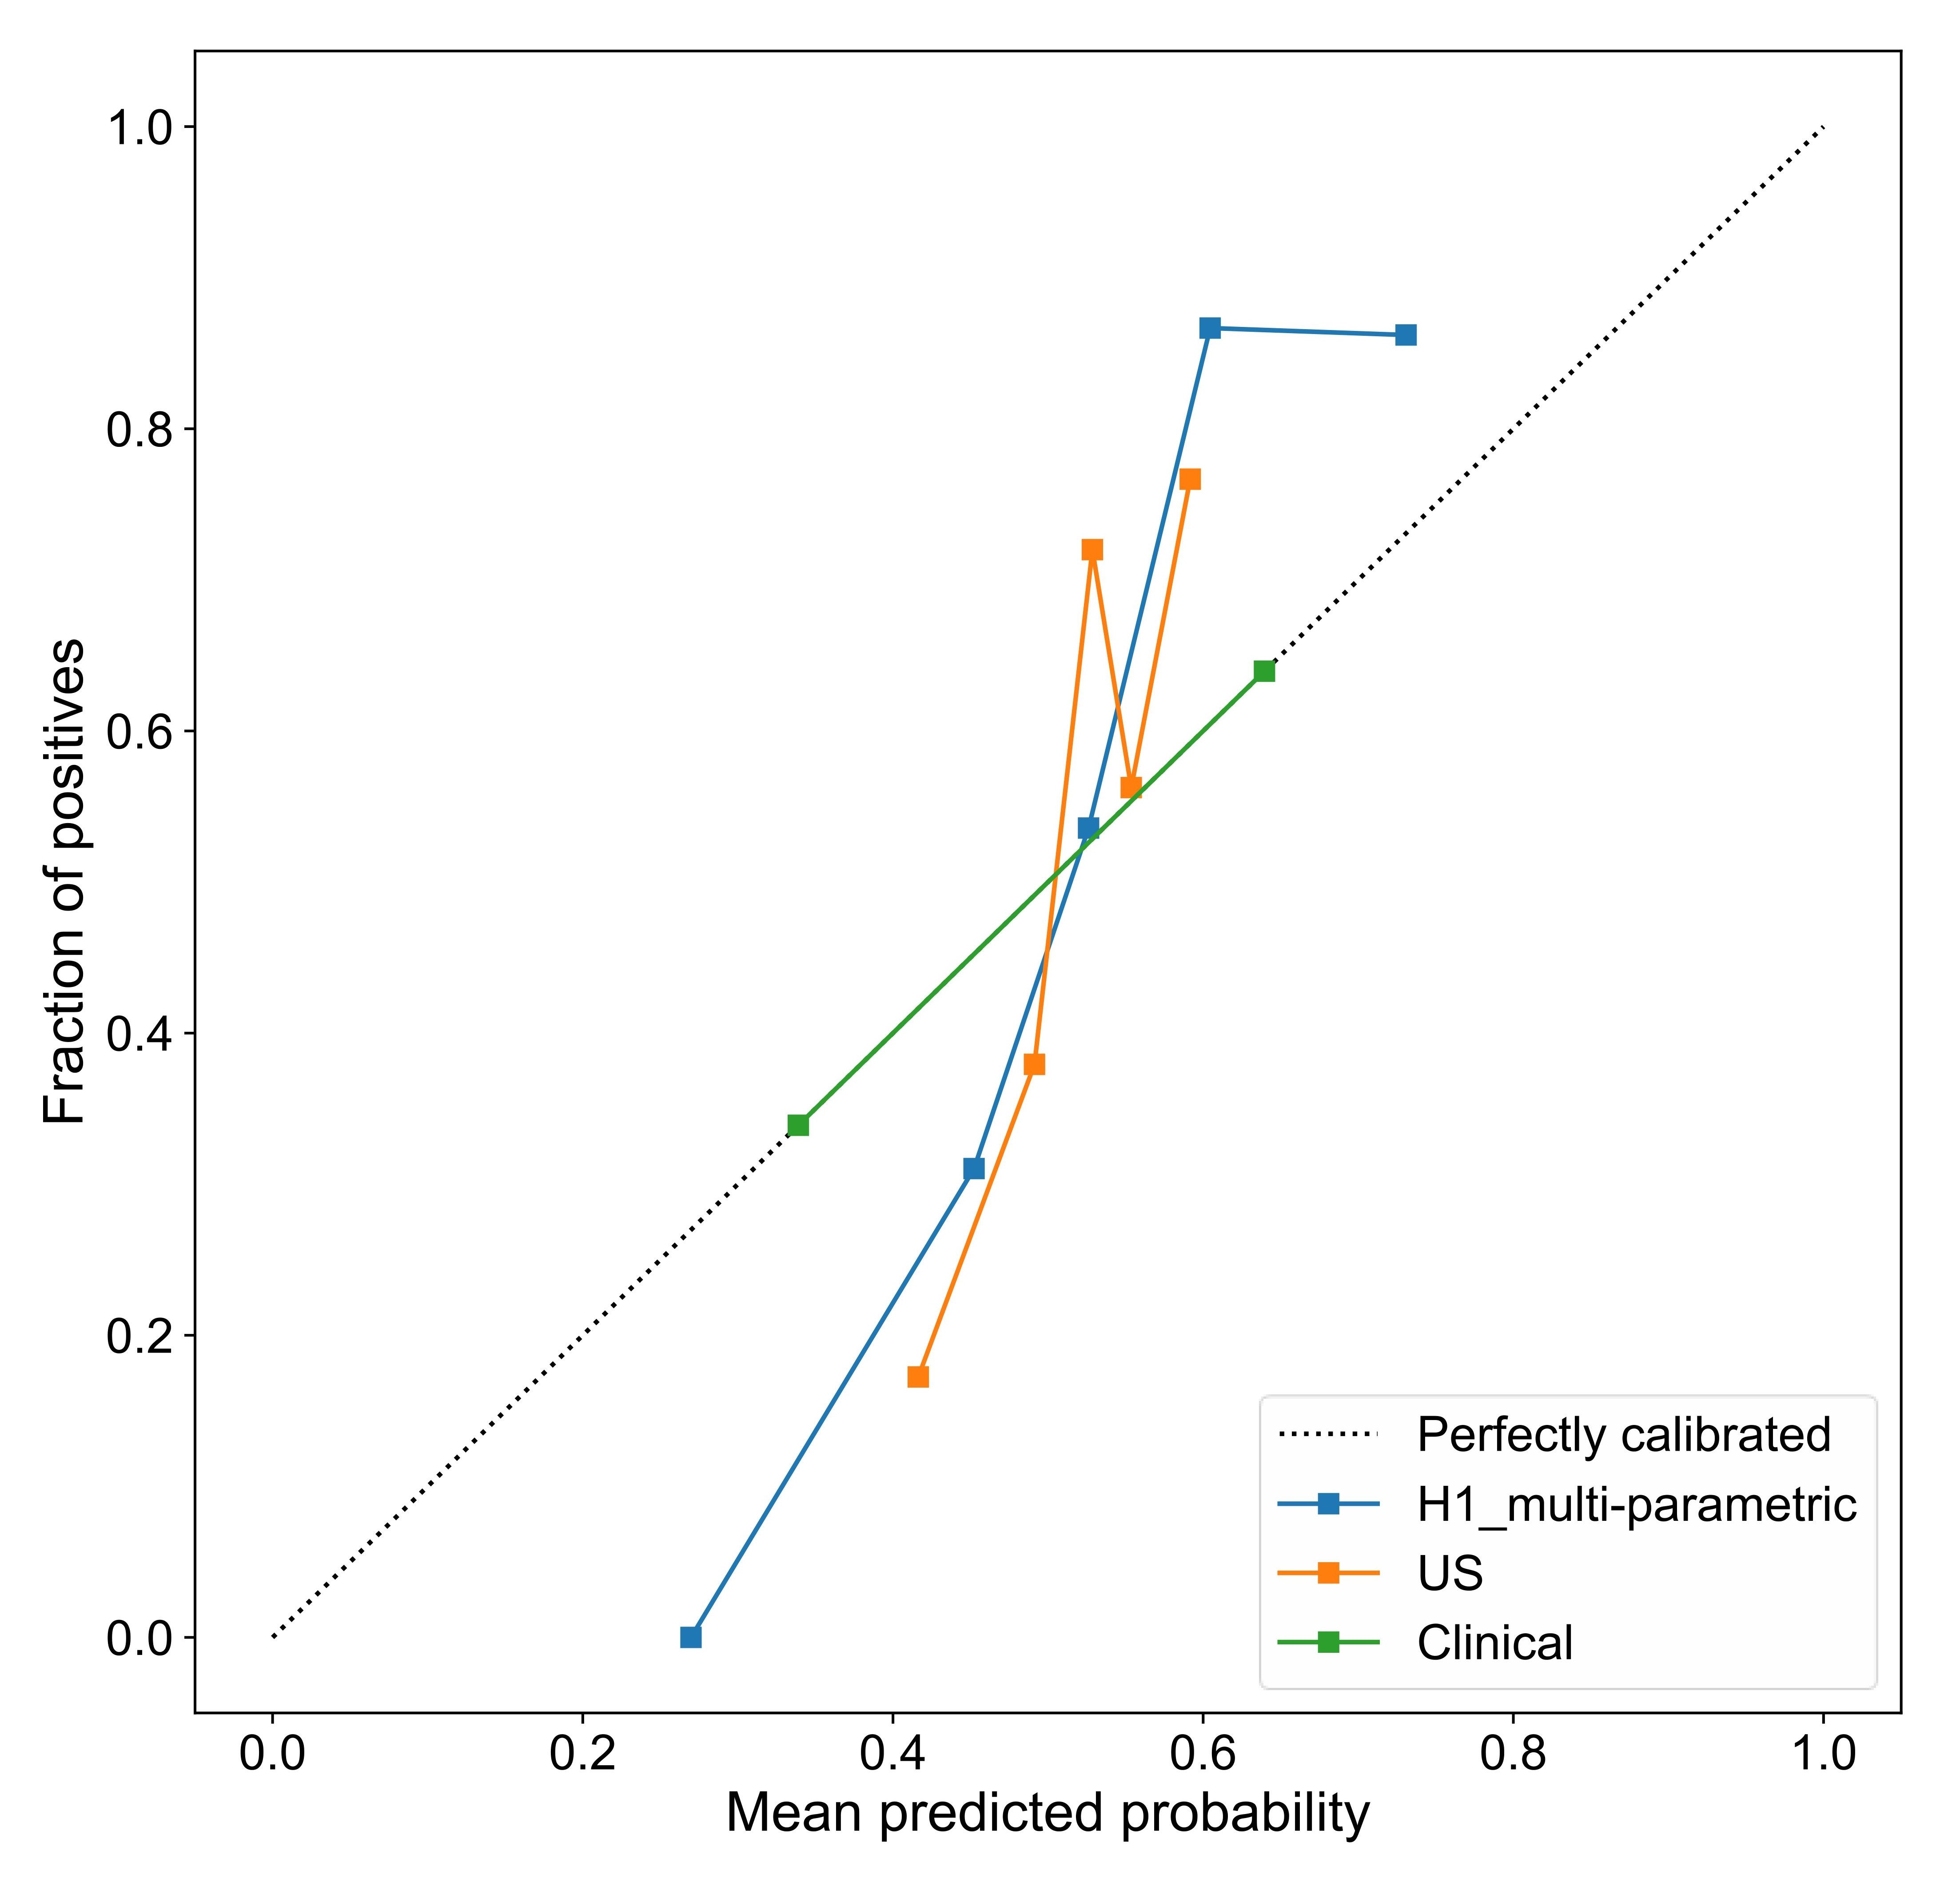


Figure S6D


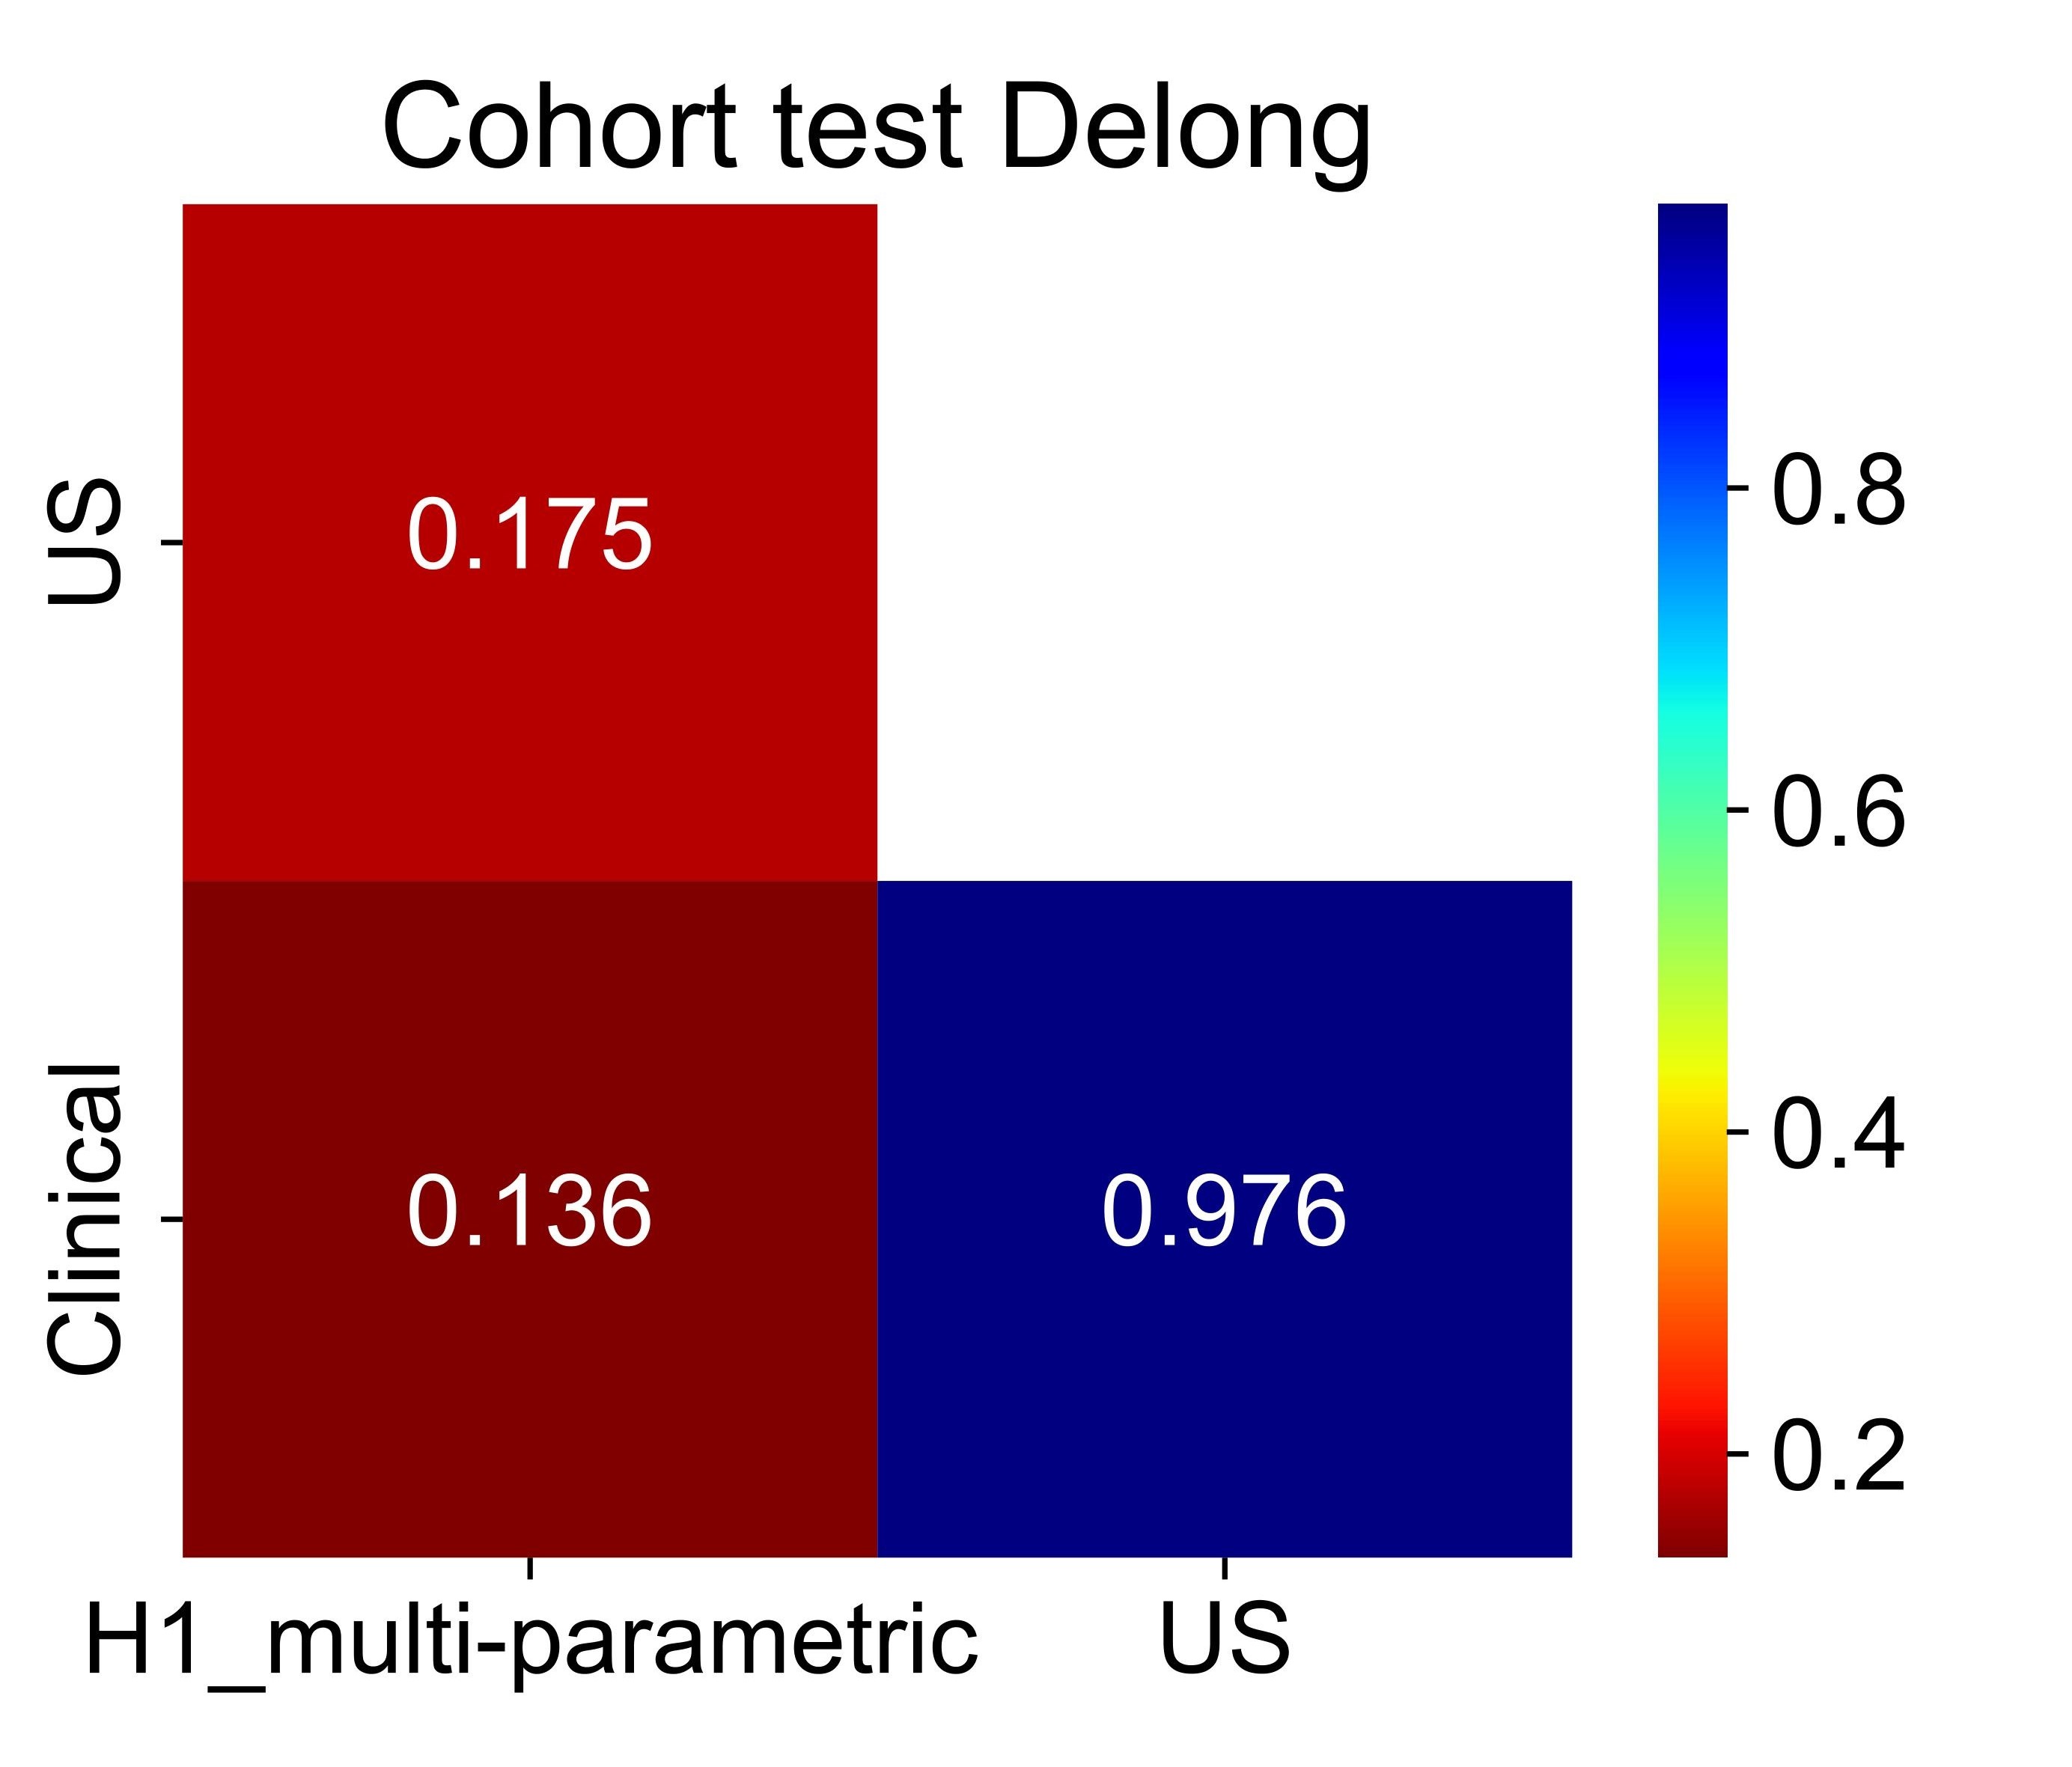


Figure S6E


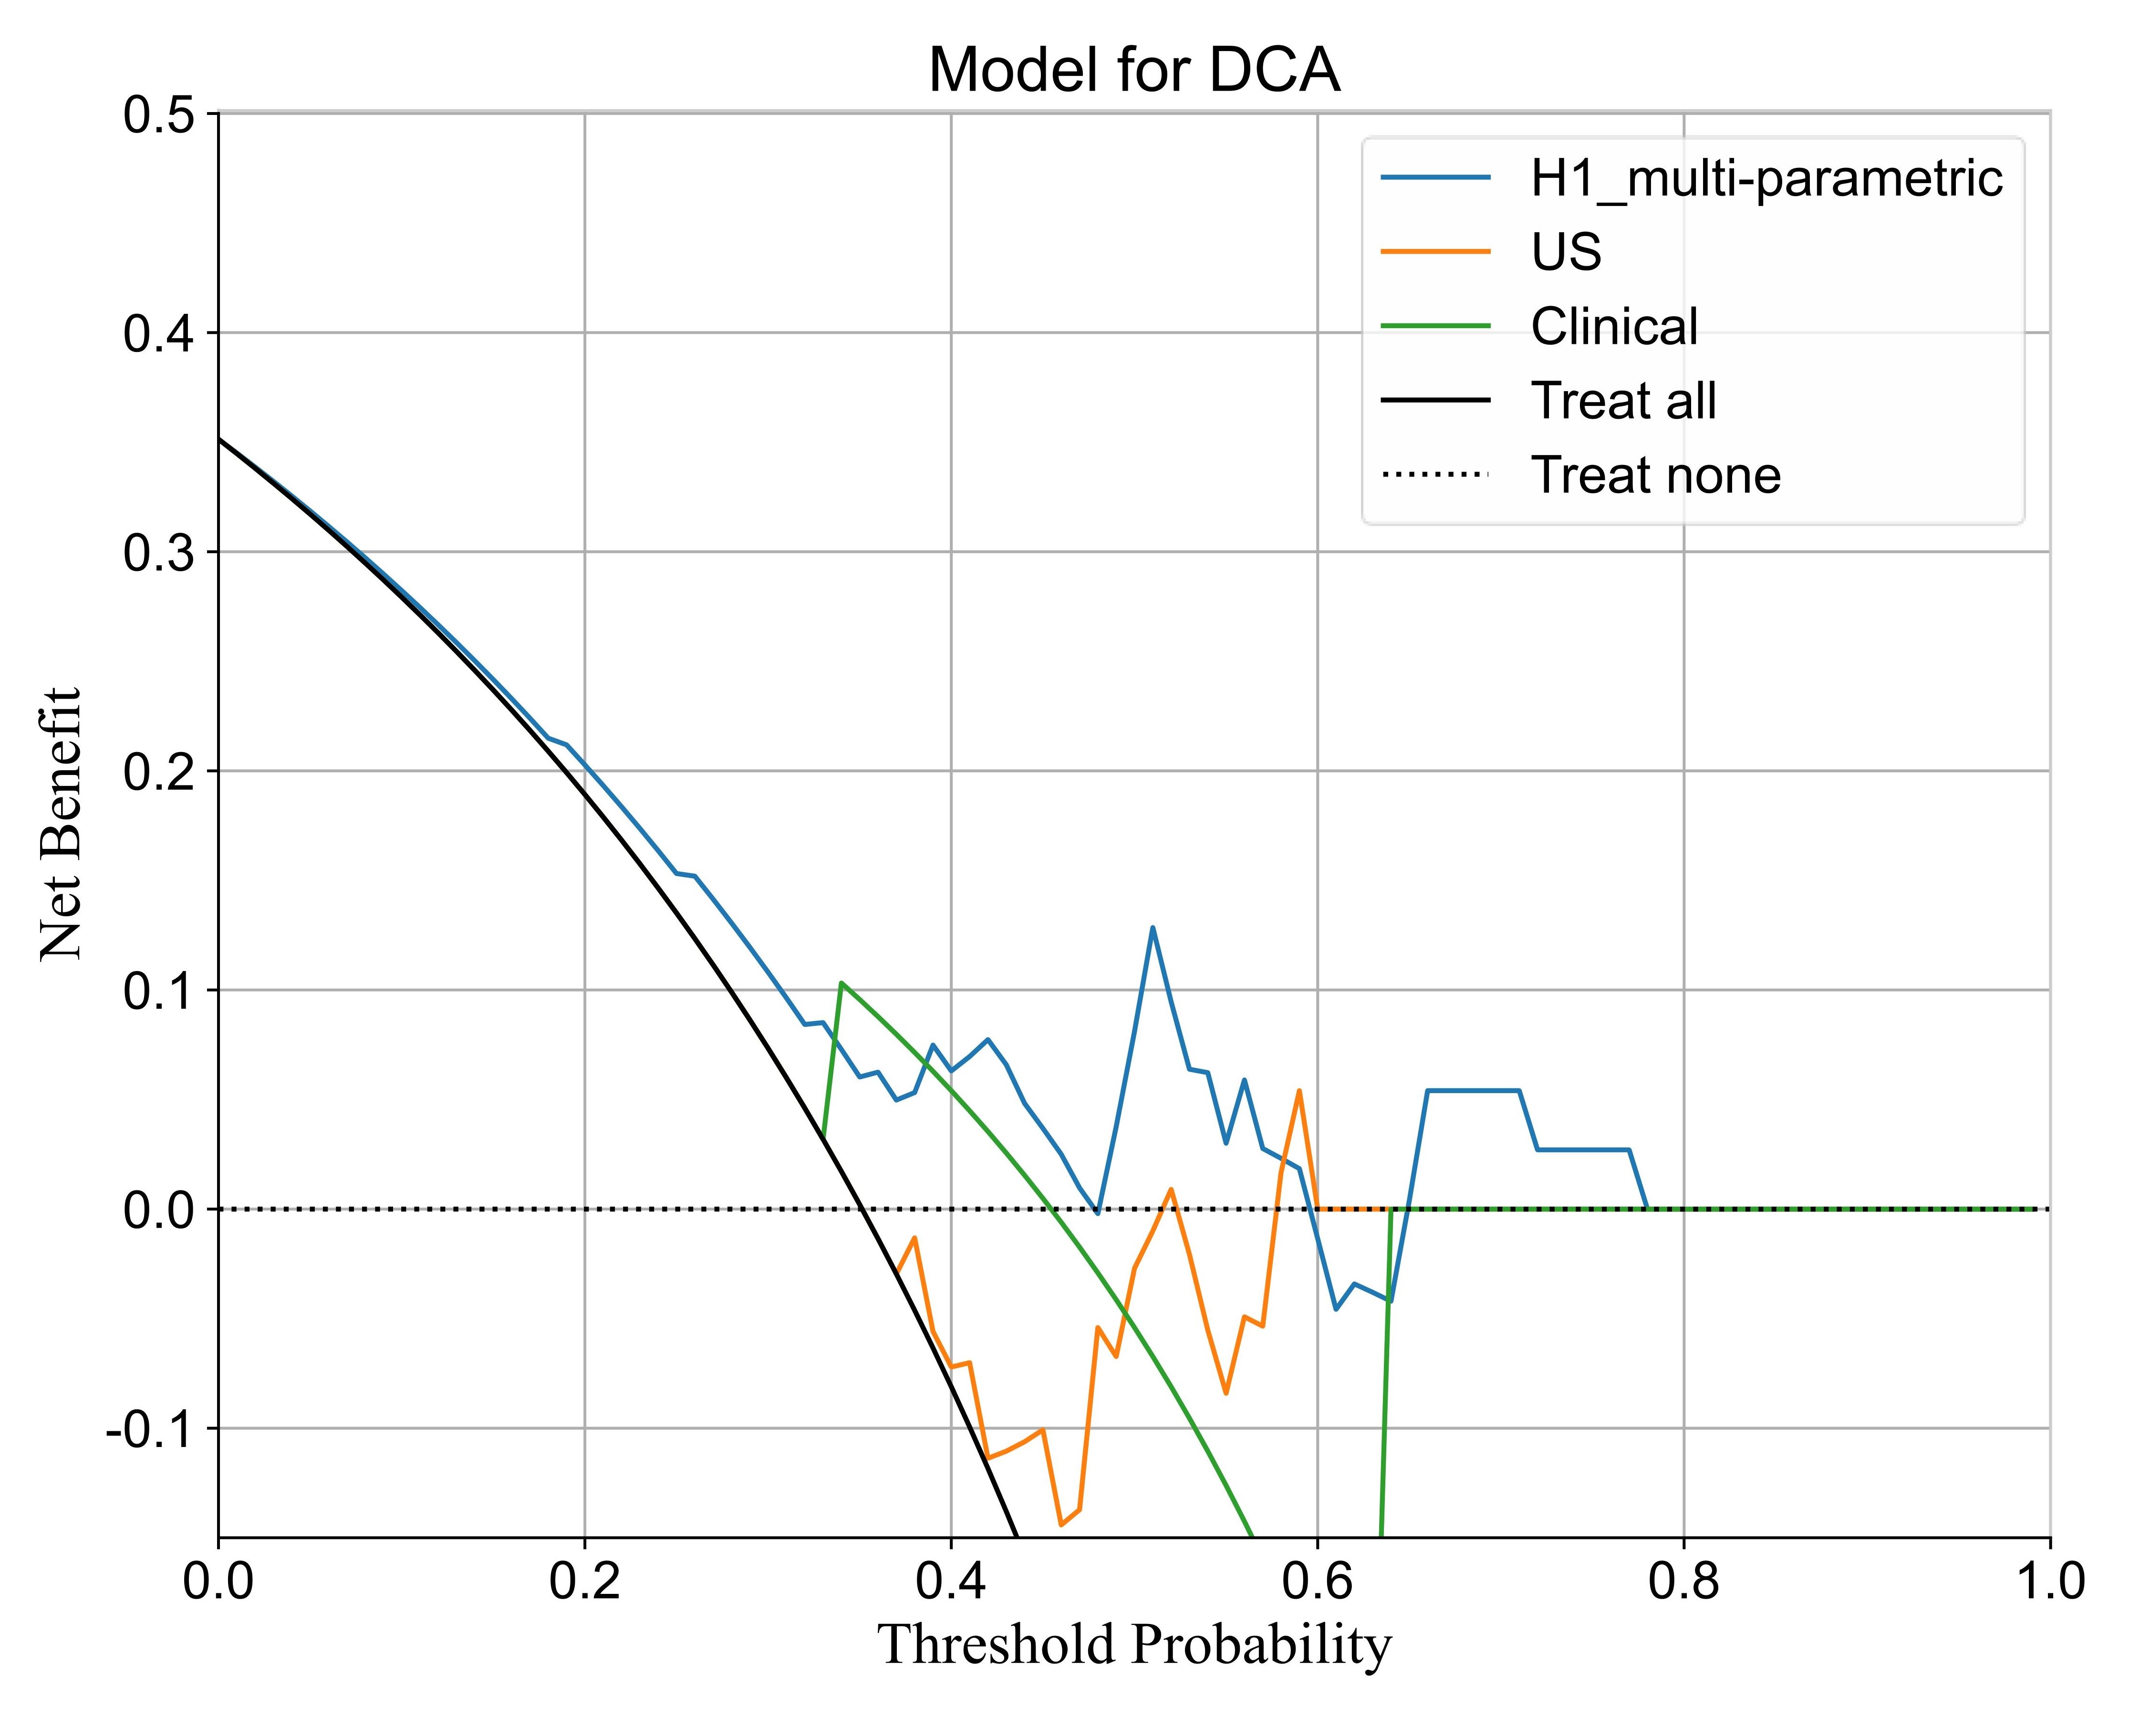


Figure S6F


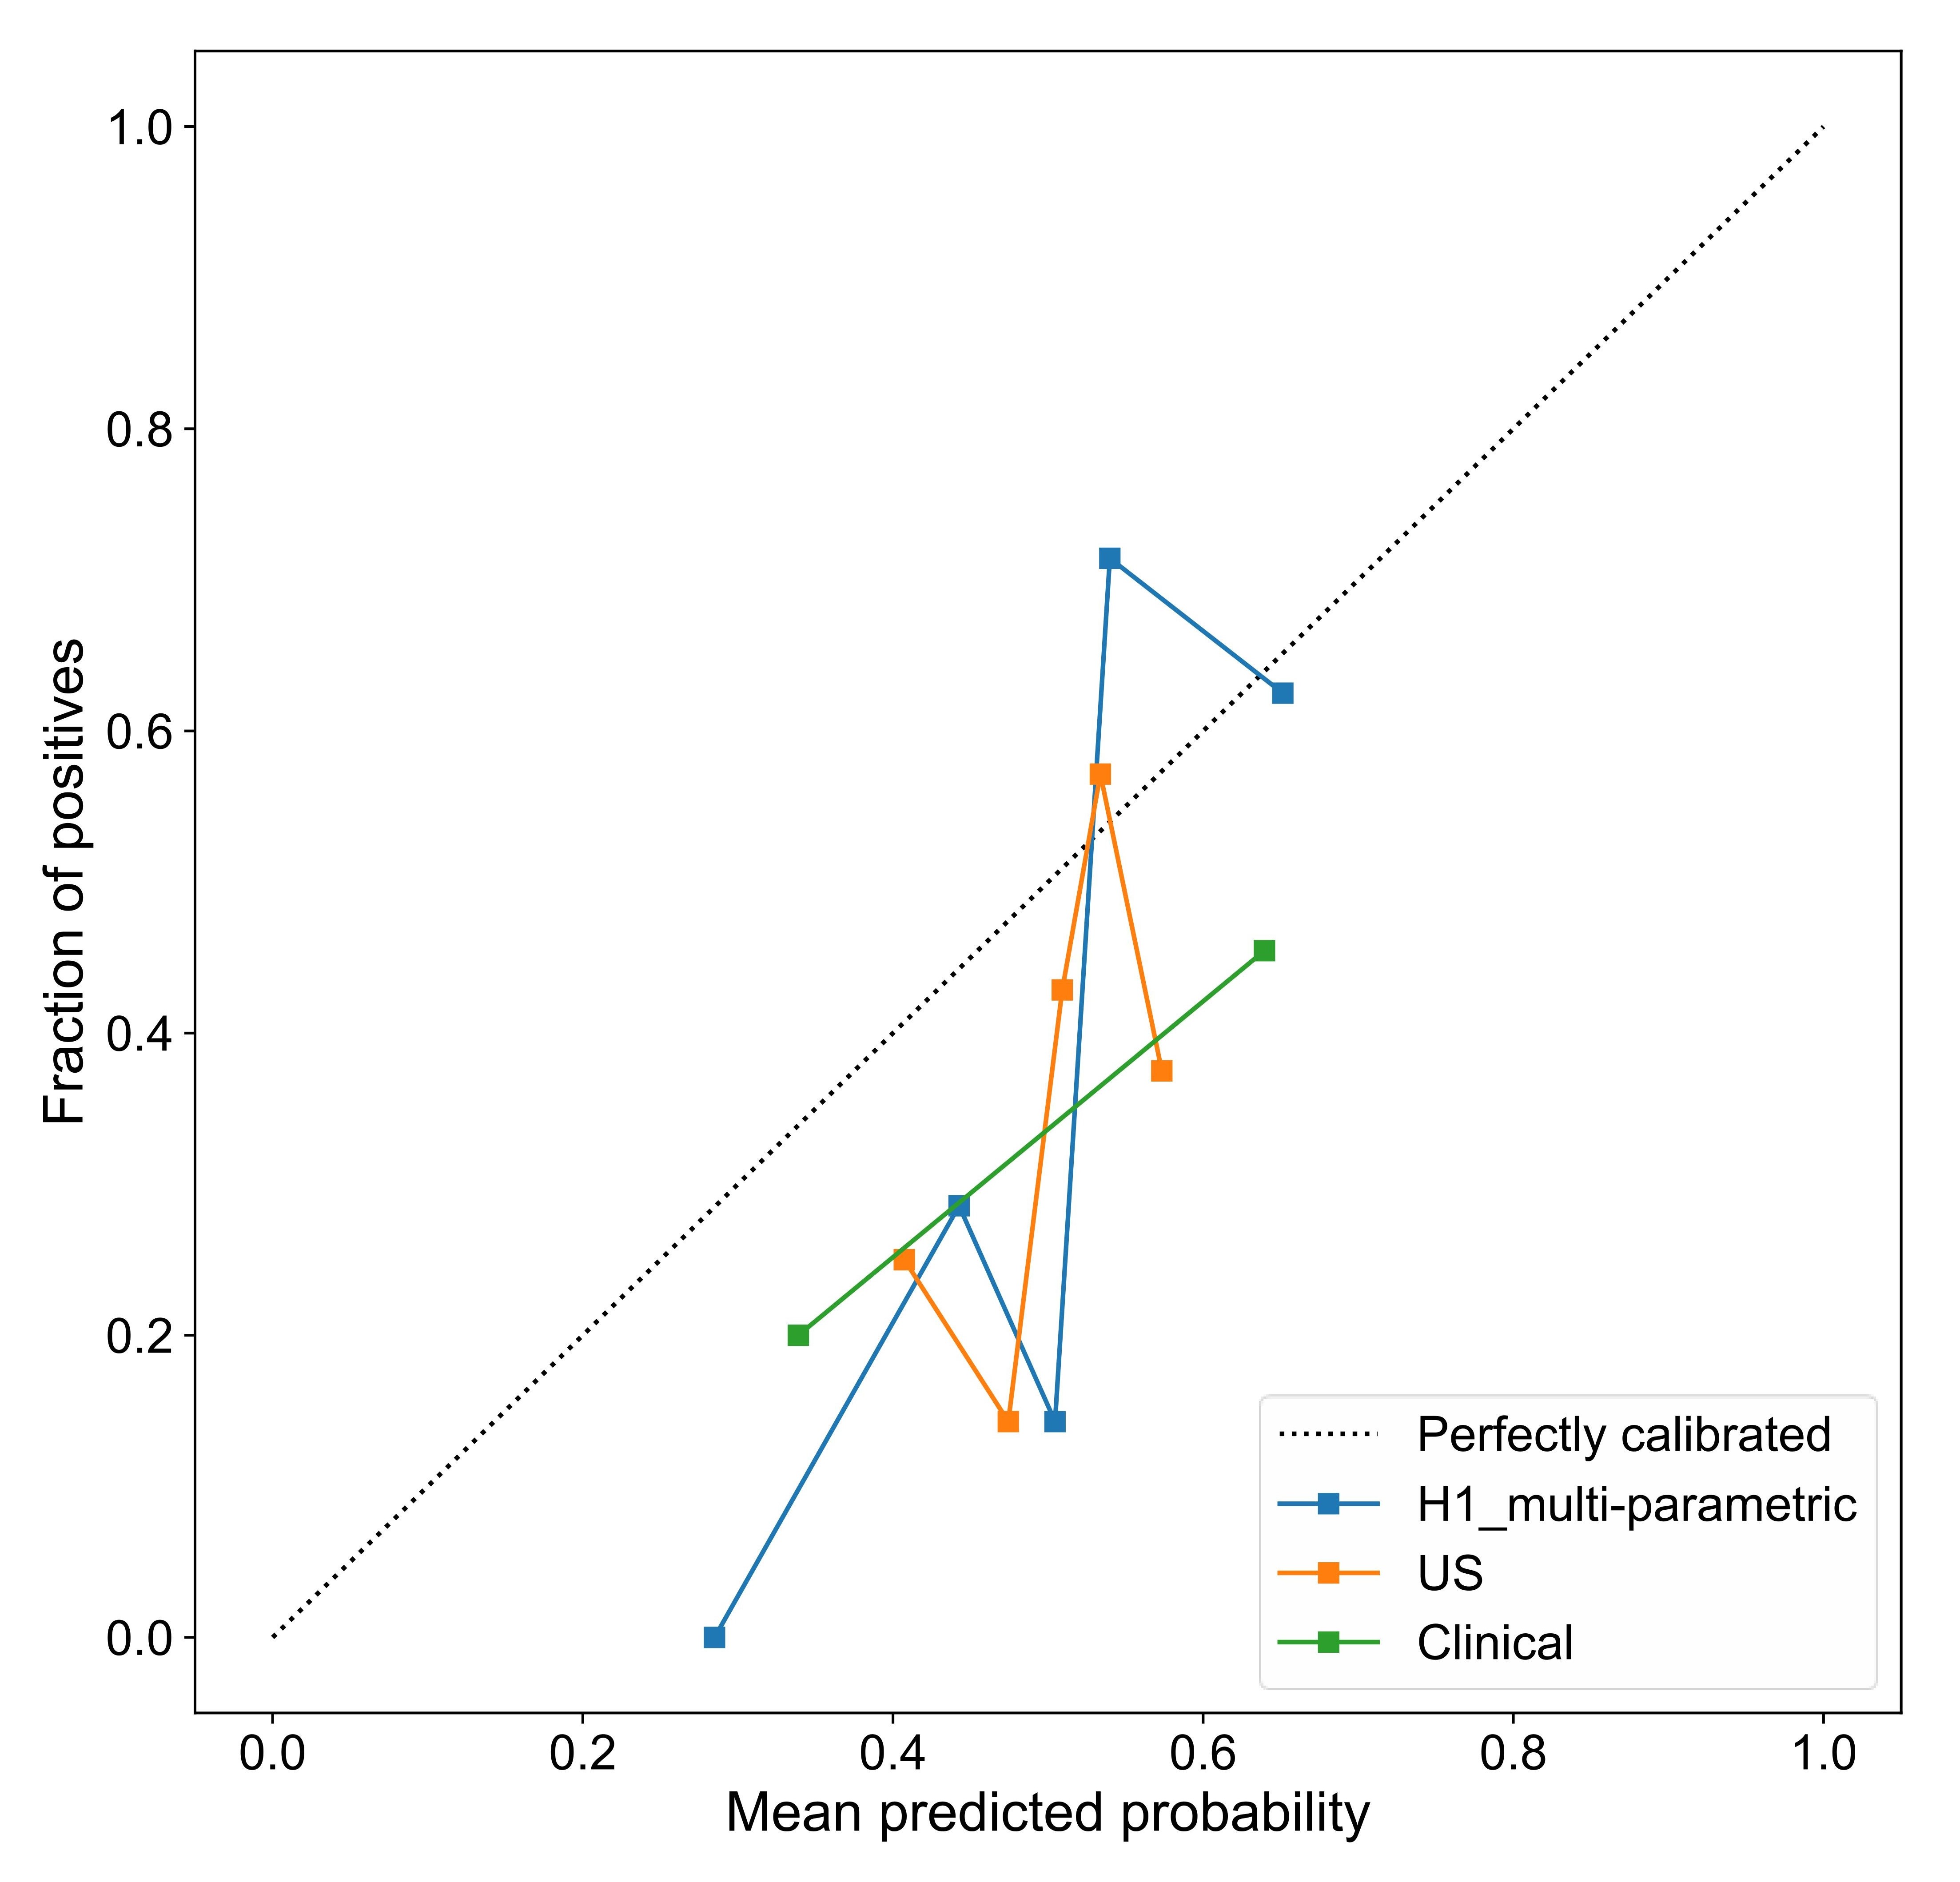


Figure S7A


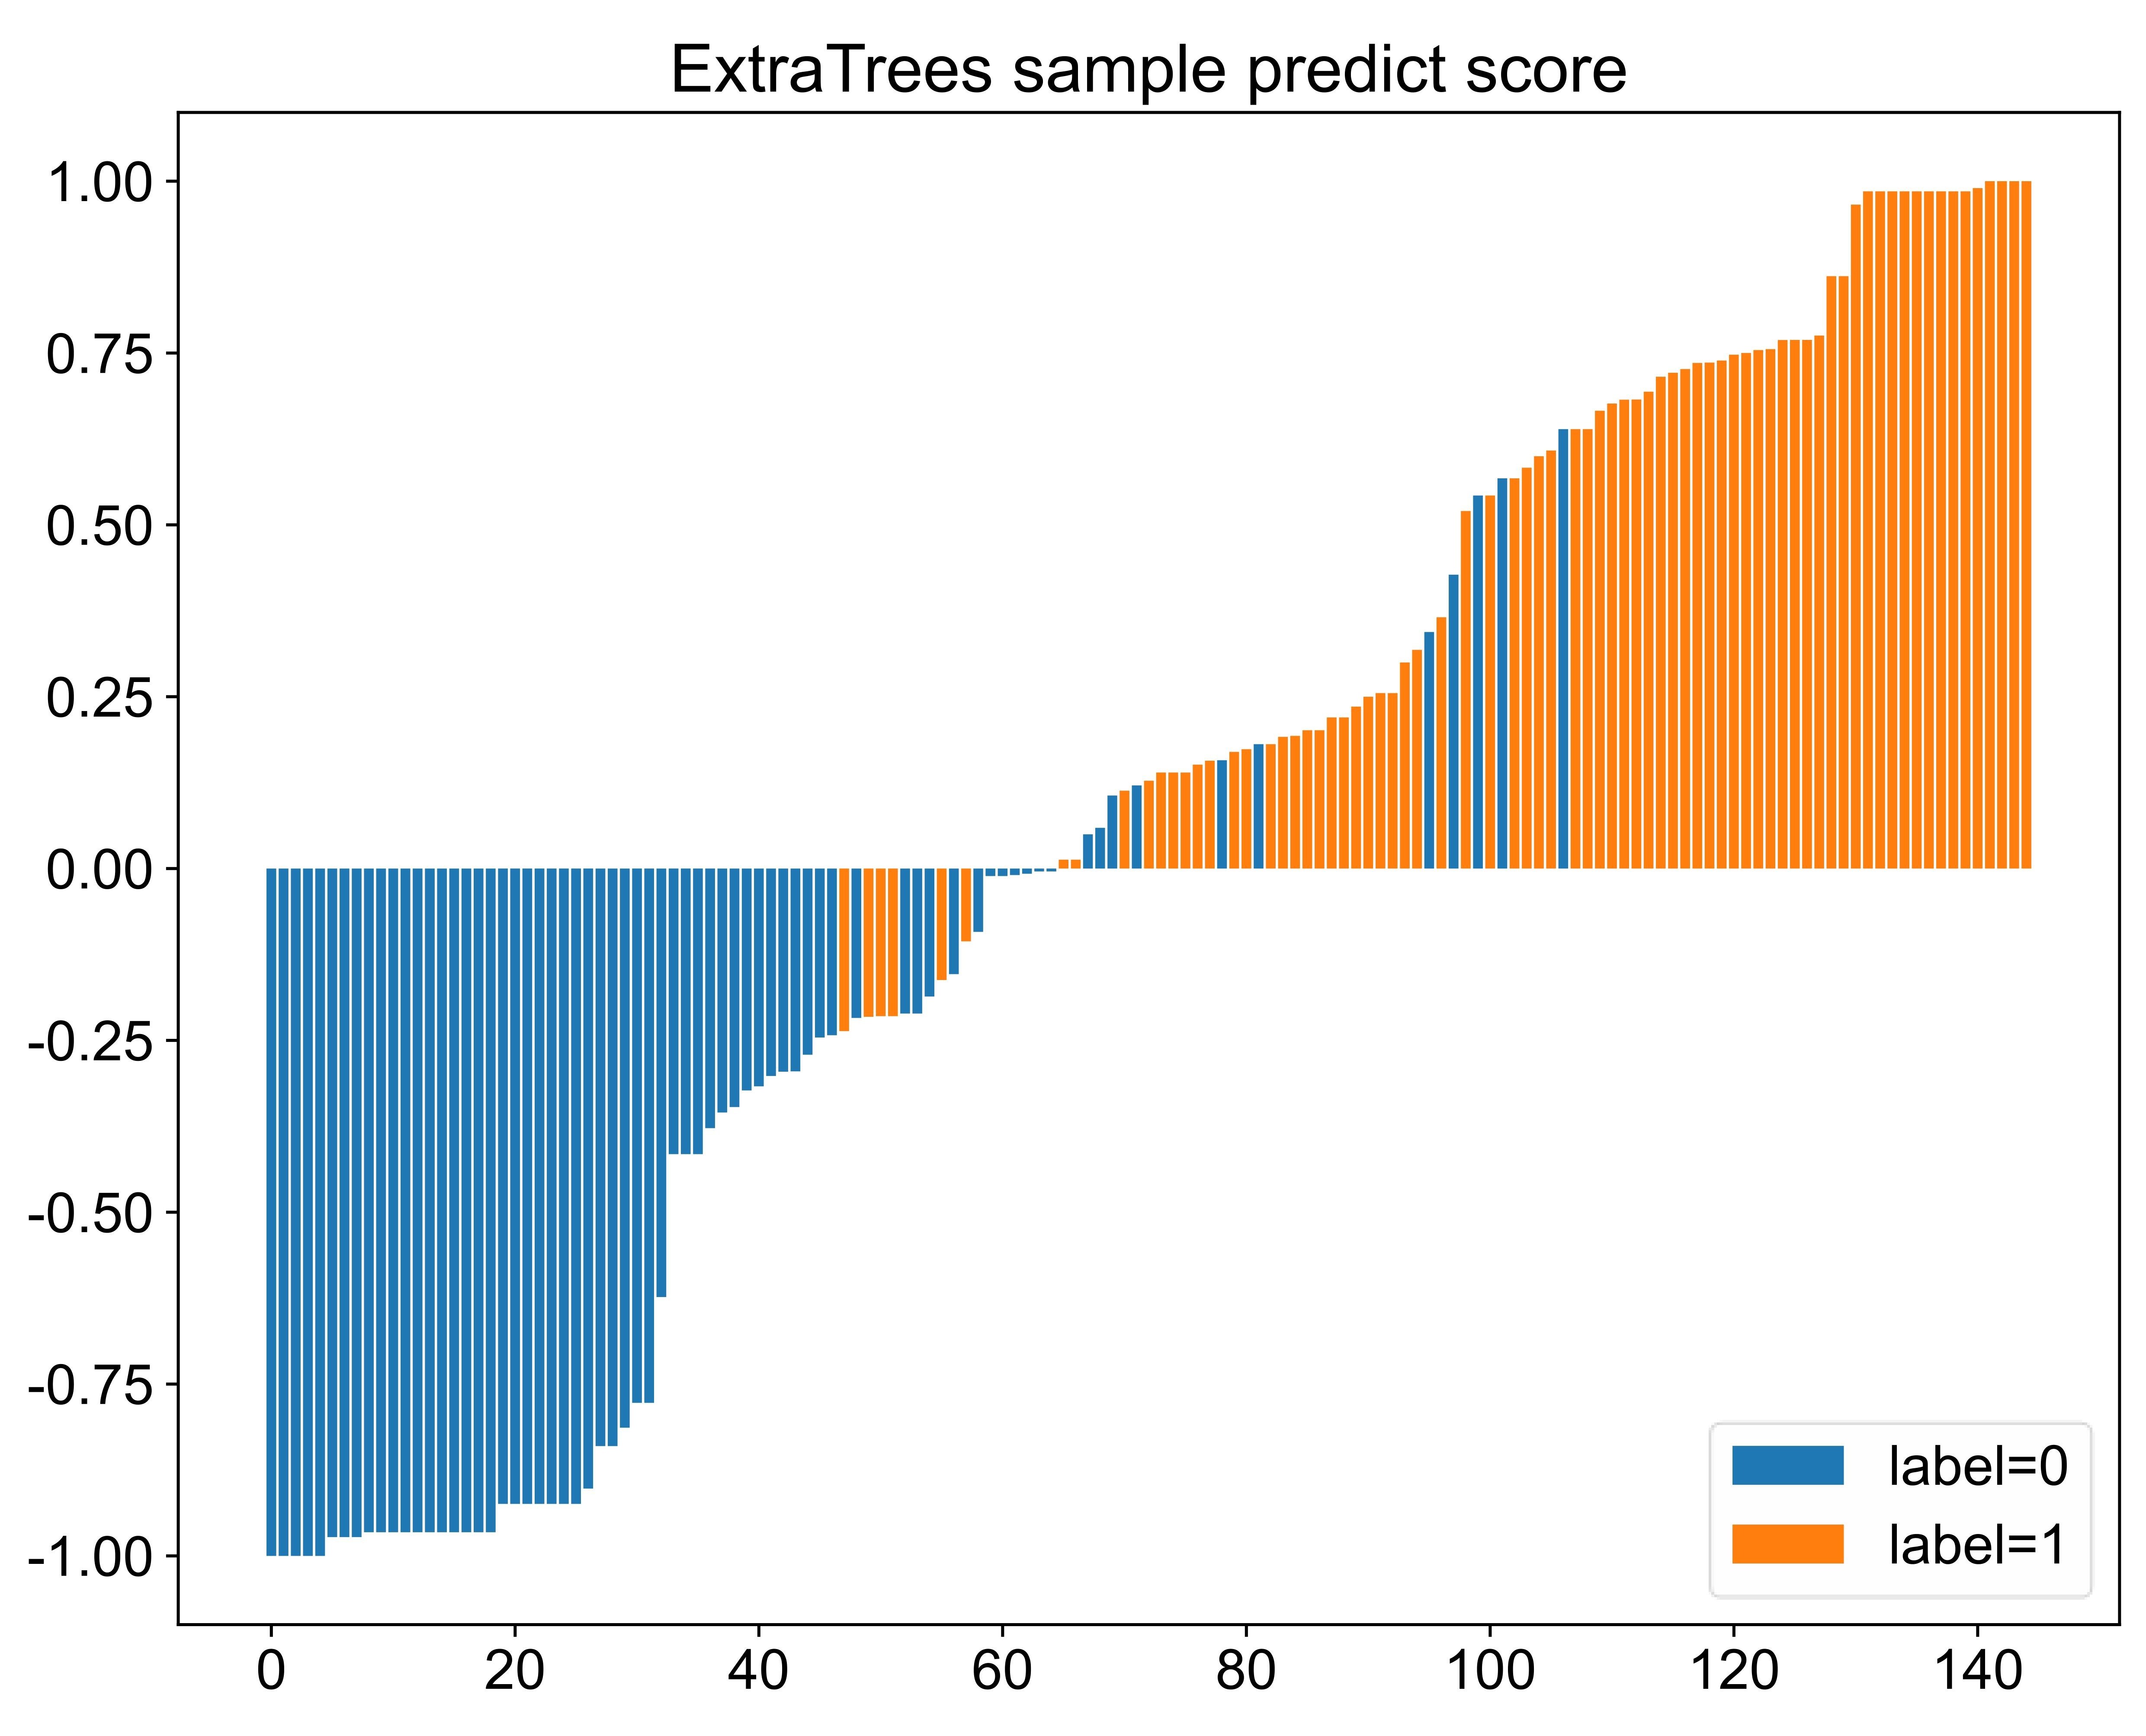


Figure S7B


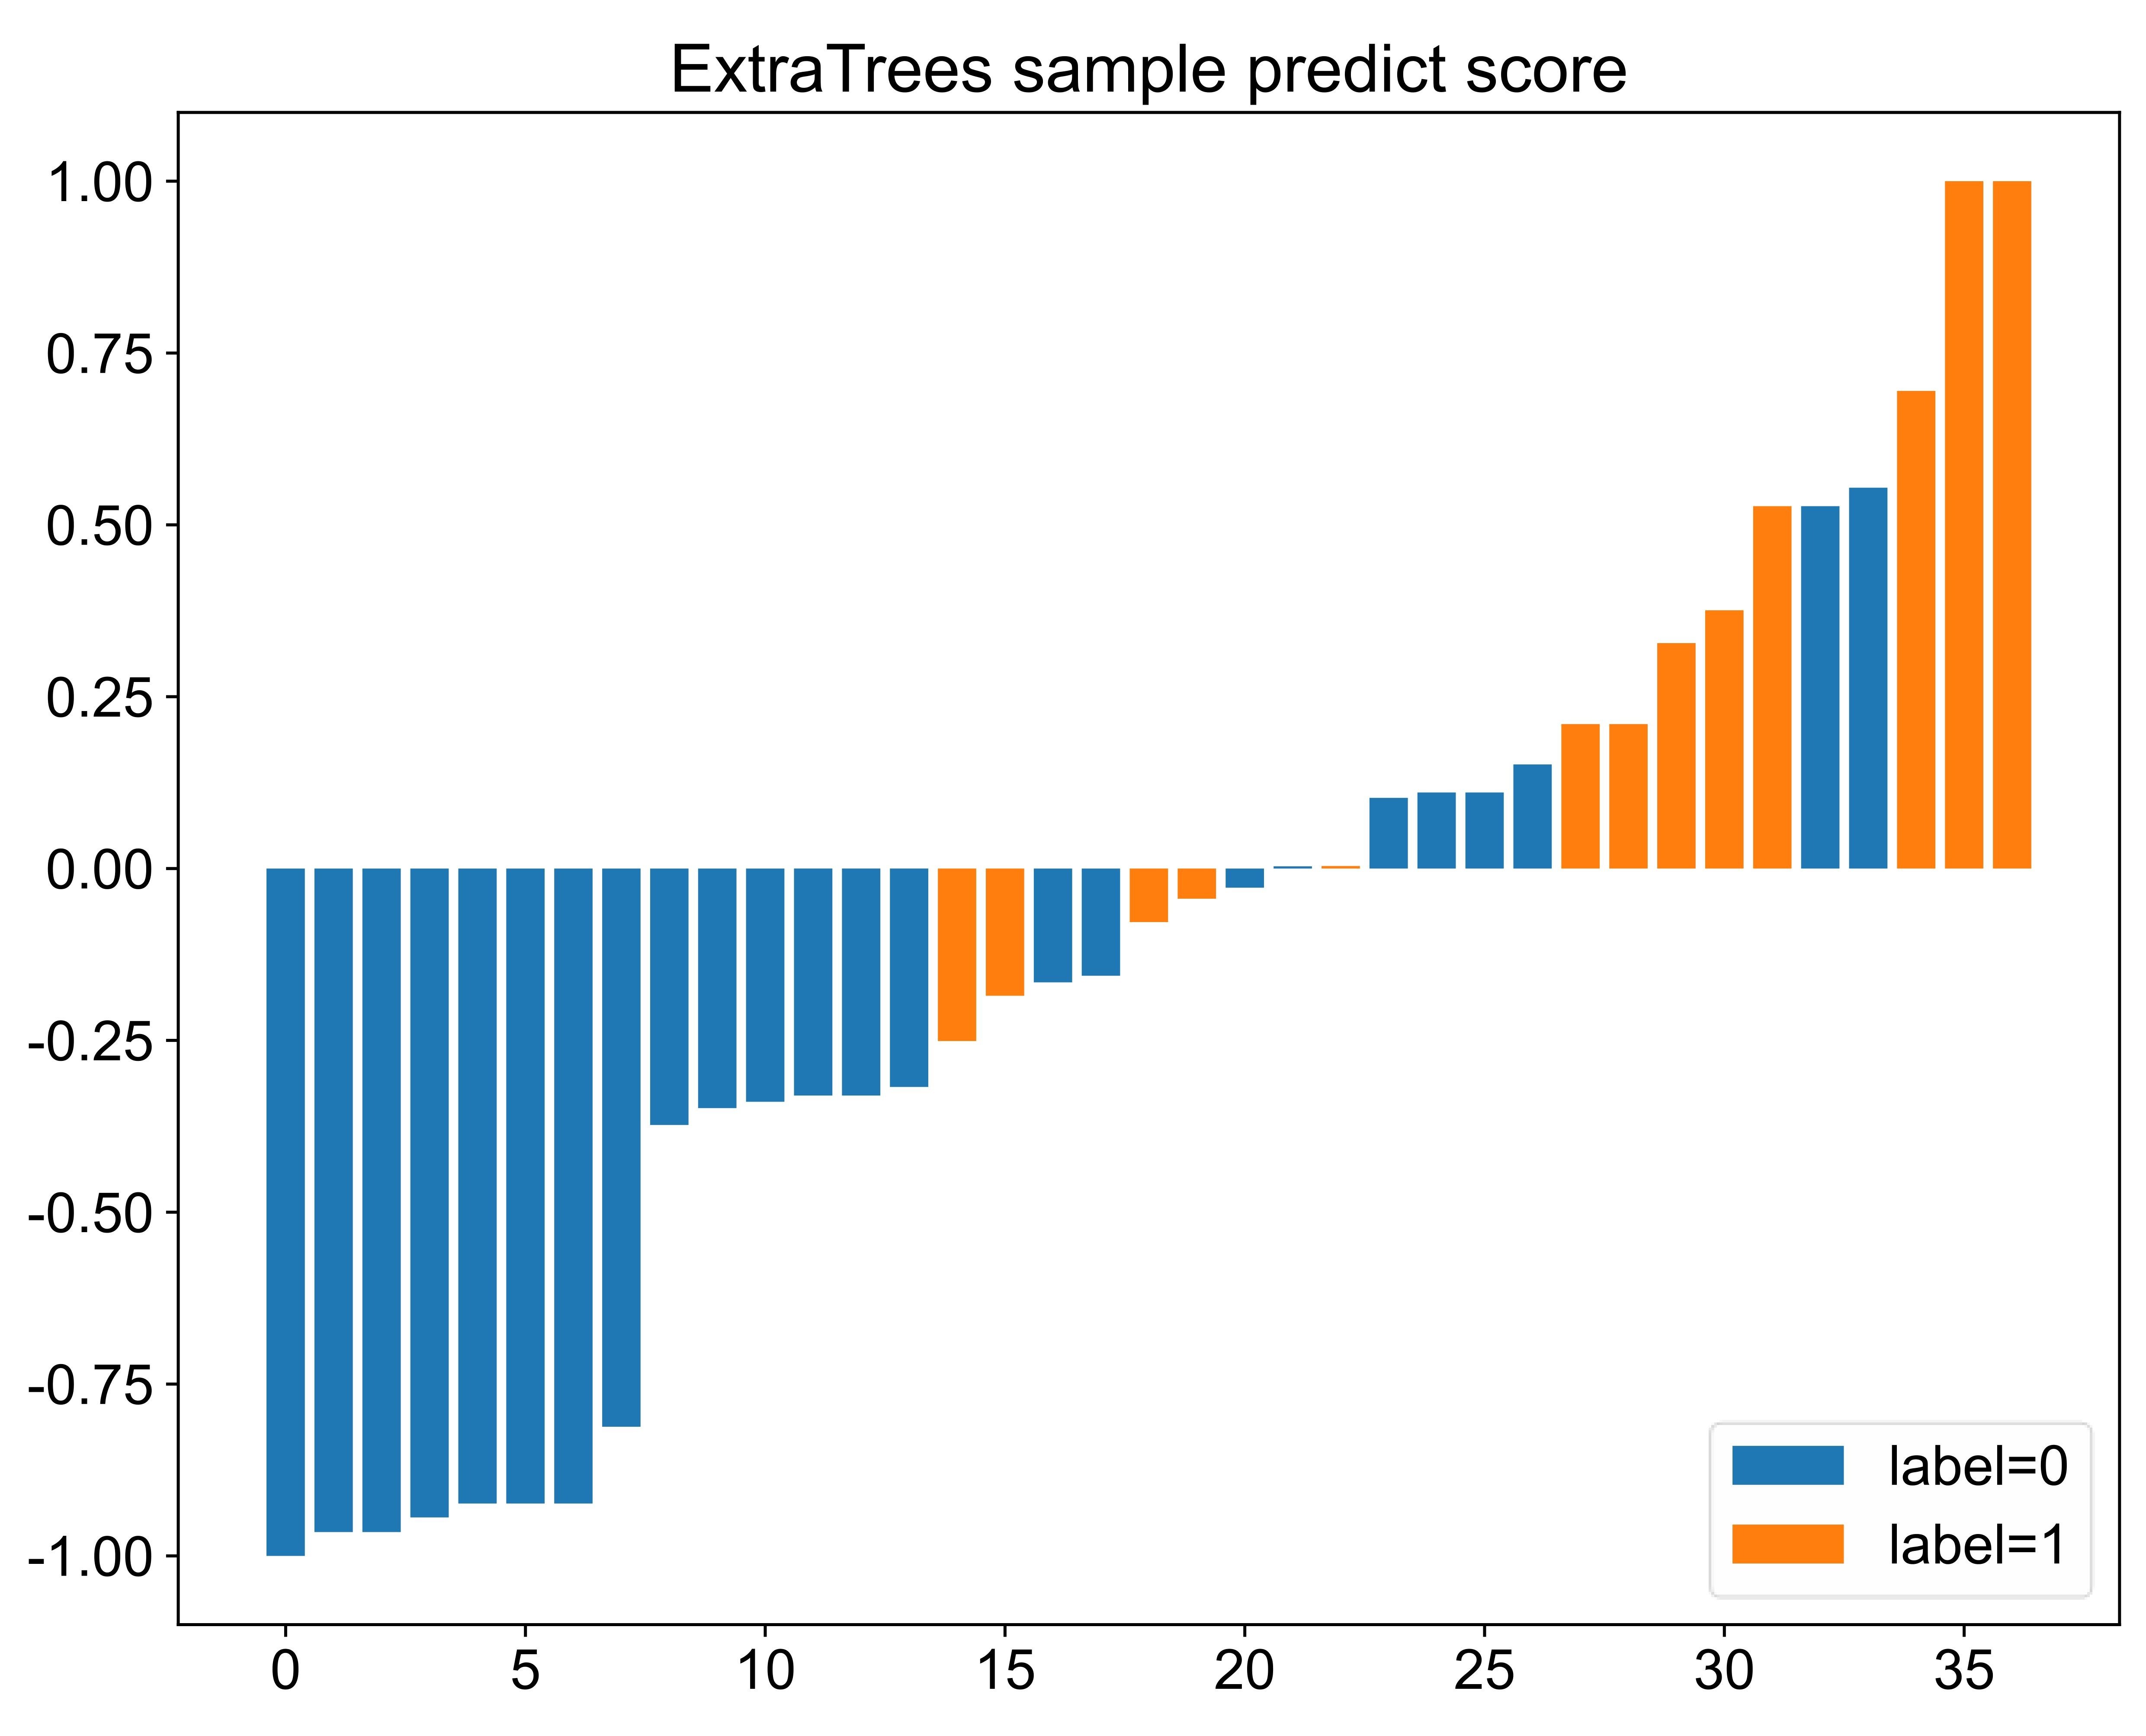


Table S1 Detailed MRI sequence information

| Sequence | Machine | TR(ms) | TE (ms) | Fat suppression | FOV (mm) | Matrix | Slice thickness  (mm) | b value  (s/mm2) | Flip Angle |
| --- | --- | --- | --- | --- | --- | --- | --- | --- | --- |
| T1WI | Siemens Verio 3.0T | 4.32 | 1.57 | Yes | 448 × 448 | 0\448\318\0 | 1 | – | 10 |
|  | Siemens Prisma 3.0T | 4.62 | 1.77 | Yes | 448 × 448 | 0\448\425\0 | 1 | – | 10 |
|  | GE 750 3.0T | 4.45 | 1.77 | No | 512× 512 | 0\320\320\0 | 1 | – | 15 |
| T2WI | Siemens Verio 3.0T | 2500 | 61 | Yes | 320 × 320 | 0\320\314\0 | 4 | – | 80 |
|  | Siemens Prisma 3.0T | 6870 | 76 | Yes | 448 × 448 | 0\448\381\0 | 4 | – | 120 |
|  | GE 750 3.0T | 4637 | 85.89 | Yes | 512 × 512 | 0\320\256\0 | 5 | – | 111 |
| DWI | Siemens Verio 3.0T | 5300 | 90 | Yes | 384 × 132 | 192\0\0\78 | 4 | 0, 700, 1000 | 90 |
|  | Siemens Prisma 3.0T | 5110 | 72 | Yes | 274 × 110 | 274\0\0\110 | 5 | 50, 800 | 180 |
|  | GE 750 3.0T | 6000 | 54.9 | Yes | 256 × 256 | 130\0\0\168 | 5 | 50, 800 | 90 |
| DCE | Siemens Verio 3.0T | 4.32 | 1.57 | Yes | 448 × 448 | 0\448\318\0 | 1 | – | 10 |
|  | Siemens Prisma 3.0T | 4.62 | 1.77 | Yes | 448 × 448 | 0\448\425\0 | 1 | – | 10 |
|  | GE 750 3.0T | 4.45 | 1.77 | No | 512 × 512 | 0\320\320\0 | 1 | – | 15 |

T1WI: T1-Weighted Imaging; T2WI: T2-Weighted Imaging; DWI: Diffusion Weighted Imaging; DCE: Dynamic Contrast-Enhanced T1-Weighted Imaging; TR: repetition time; TE: echo time; FOV: field of view.

Table S2 Hyperparameters of the models

| Model | n_estimators | max_depth | min_samples_split |
| --- | --- | --- | --- |
| US | 12 | 2 | 10 |
| Clinical | 10 | 3 | 2 |
| Model_T1_H1+H2+H3 | 10 | 5 | 10 |
| Model_T2_H1+H2+H3 | 10 | 3 | 2 |
| Model_DCE1_H1+H2+H3 | 20 | 3 | 2 |
| Model_DCE2_H1+H2+H3 | 30 | 5 | 10 |
| Model_DWI_H1+H2+H3 | 10 | 3 | 12 |
| Model_H1_multi-parametric | 10 | 5 | 2 |
| Model_H2_multi-parametric | 55 | 5 | 9 |
| Model_H3_multi-parametric | 35 | 5 | 12 |
| Model_Habitat_Whole | 4 | 6 | 25 |
| Model_H1+US | 20 | 5 | 3 |
| Model_H1+US+Cli | 25 | 6 | 2 |

Table S3 Clinical characteristics of patients in training and testing sets

| feature name | train-ALL | train-HER2-(-) | train-HER2-(+) | pvalue | test-ALL | test-HER2-(-) | test-HER2-(+) | pvalue |
| --- | --- | --- | --- | --- | --- | --- | --- | --- |
| BMI | 23.20±3.10 | 22.73±3.01 | 23.63±3.14 | 0.111 | 24.35±3.52 | 23.90±3.31 | 25.18±3.88 | 0.300 |
| age | 49.41±10.35 | 47.47±9.97 | 51.21±10.44 | 0.029 | 50.19±11.15 | 51.00±11.86 | 48.69±9.96 | 0.555 |
| pregnancies | 2.06±1.20 | 2.00±1.09 | 2.12±1.30 | 0.897 | 2.54±1.69 | 2.29±1.63 | 3.00±1.78 | 0.180 |
| ADC value | 0.94±0.23 | 0.97±0.26 | 0.92±0.21 | 0.689 | 0.94±0.16 | 0.92±0.16 | 0.97±0.17 | 0.576 |
| BC family history |  |  |  | 0.455 |  |  |  | 1.000 |
| Yes | 134(92.41) | 63(90.00) | 71(94.67) |  | 34(91.89) | 22(91.67) | 12(92.31) |  |
| No | 11(7.59) | 7(10.00) | 4(5.33) |  | 3(8.11) | 2(8.33) | 1(7.69) |  |
| menopause status |  |  |  | 0.092 |  |  |  | 1.000 |
| Yes | 86(59.31) | 47(67.14) | 39(52.00) |  | 23(62.16) | 15(62.50) | 8(61.54) |  |
| No | 59(40.69) | 23(32.86) | 36(48.00) |  | 14(37.84) | 9(37.50) | 5(38.46) |  |
| AFP |  |  |  | 0.972 |  |  |  | 1.000 |
| 0.89-8.78 ng/ml | 144(99.31) | 69(98.57) | 75(100.00) |  | 36(97.30) | 23(95.83) | 13(100.00) |  |
| ＜0.89 or ＞8.78 | 1(0.69) | 1(1.43) | null |  | 1(2.70) | 1(4.17) | null |  |
| CEA |  |  |  | 0.017 |  |  |  | 0.225 |
| ≤ 5.00 ng/ml | 131(90.34) | 68(97.14) | 63(84.00) |  | 35(94.59) | 24(100.00) | 11(84.62) |  |
| ＞5.00 ng/ml | 14(9.66) | 2(2.86) | 12(16.00) |  | 2(5.41) | null | 2(15.38) |  |
| CA125 |  |  |  | 0.476 |  |  |  | 0.574 |
| ≤ 35.00 U/ml | 132(91.03) | 62(88.57) | 70(93.33) |  | 34(91.89) | 23(95.83) | 11(84.62) |  |
| ＞35.00 U/ml | 13(8.97) | 8(11.43) | 5(6.67) |  | 3(8.11) | 1(4.17) | 2(15.38) |  |
| CA153 |  |  |  | 0.686 |  |  |  | 0.752 |
| ≤ 31.30 U/ml | 130(89.66) | 64(91.43) | 66(88.00) |  | 36(97.30) | 24(100.00) | 12(92.31) |  |
| ＞ 31.30 U/ml | 15(10.34) | 6(8.57) | 9(12.00) |  | 1(2.70) | null | 1(7.69) |  |
| CA199 |  |  |  | 1.000 |  |  |  | 0.225 |
| ≤ 37.00 U/ml | 132(91.03) | 64(91.43) | 68(90.67) |  | 33(89.19) | 23(95.83) | 10(76.92) |  |
| ＞37.00 U/ml | 13(8.97) | 6(8.57) | 7(9.33) |  | 4(10.81) | 1(4.17) | 3(23.08) |  |
| multiple lesions |  |  |  | 0.257 |  |  |  | 0.972 |
| Yes | 98(67.59) | 51(72.86) | 47(62.67) |  | 30(81.08) | 20(83.33) | 10(76.92) |  |
| No | 47(32.41) | 19(27.14) | 28(37.33) |  | 7(18.92) | 4(16.67) | 3(23.08) |  |
| position |  |  |  | 0.267 |  |  |  | 0.280 |
| outer upper quadrant | 62(42.76) | 26(37.14) | 36(48.00) |  | 18(48.65) | 13(54.17) | 5(38.46) |  |
| outer lower quadrant | 21(14.48) | 11(15.71) | 10(13.33) |  | 3(8.11) | 3(12.50) | null |  |
| inner lower quadrant | 7(4.83) | 3(4.29) | 4(5.33) |  | 4(10.81) | 3(12.50) | 1(7.69) |  |
| inner upper quadrant | 27(18.62) | 18(25.71) | 9(12.00) |  | 7(18.92) | 3(12.50) | 4(30.77) |  |
| multiple quadrants | 28(19.31) | 12(17.14) | 16(21.33) |  | 5(13.51) | 2(8.33) | 3(23.08) |  |
| MR length |  |  |  | 0.124 |  |  |  | 0.077 |
| ＜2cm | 31(21.38) | 20(28.57) | 11(14.67) |  | 11(29.73) | 9(37.50) | 2(15.38) |  |
| 2cm-5cm | 94(64.83) | 41(58.57) | 53(70.67) |  | 24(64.86) | 15(62.50) | 9(69.23) |  |
| ＞5cm | 20(13.79) | 9(12.86) | 11(14.67) |  | 2(5.41) | null | 2(15.38) |  |
| TIC type |  |  |  | 0.836 |  |  |  | 0.551 |
| persistent | 11(7.59) | 6(8.57) | 5(6.67) |  | 1(2.70) | 1(4.17) | null |  |
| plateau | 52(35.86) | 26(37.14) | 26(34.67) |  | 19(51.35) | 11(45.83) | 8(61.54) |  |
| washout | 82(56.55) | 38(54.29) | 44(58.67) |  | 17(45.95) | 12(50.00) | 5(38.46) |  |
| axillary lymph nodes(length>1cm) |  |  |  | 0.512 |  |  |  | 0.444 |
| Yes | 84(57.93) | 43(61.43) | 41(54.67) |  | 27(72.97) | 19(79.17) | 8(61.54) |  |
| No | 61(42.07) | 27(38.57) | 34(45.33) |  | 10(27.03) | 5(20.83) | 5(38.46) |  |
| ADLER blood flow grading |  |  |  | 0.027 |  |  |  | 0.055 |
| 0 | 25(17.24) | 12(17.14) | 13(17.33) |  | 8(21.62) | 7(29.17) | 1(7.69) |  |
| 1 | 35(24.14) | 24(34.29) | 11(14.67) |  | 8(21.62) | 7(29.17) | 1(7.69) |  |
| 2 | 49(33.79) | 22(31.43) | 27(36.00) |  | 11(29.73) | 4(16.67) | 7(53.85) |  |
| 3 | 36(24.83) | 12(17.14) | 24(32.00) |  | 10(27.03) | 6(25.00) | 4(30.77) |  |
| calcification |  |  |  | 0.001 |  |  |  | 0.214 |
| Yes | 59(40.69) | 39(55.71) | 20(26.67) |  | 15(40.54) | 12(50.00) | 3(23.08) |  |
| No | 86(59.31) | 31(44.29) | 55(73.33) |  | 22(59.46) | 12(50.00) | 10(76.92) |  |
| US length |  |  |  | 0.082 |  |  |  | 0.118 |
| ≤2cm | 41(28.28) | 25(35.71) | 16(21.33) |  | 10(27.03) | 9(37.50) | 1(7.69) |  |
| ＞2cm | 104(71.72) | 45(64.29) | 59(78.67) |  | 27(72.97) | 15(62.50) | 12(92.31) |  |
| palpation finding |  |  |  | 0.615 |  |  |  | 1.000 |
| Yes | 6(4.14) | 4(5.71) | 2(2.67) |  | 3(8.11) | 2(8.33) | 1(7.69) |  |
| No | 139(95.86) | 66(94.29) | 73(97.33) |  | 34(91.89) | 22(91.67) | 12(92.31) |  |
| Appearance changes |  |  |  | 0.652 |  |  |  | 0.752 |
| Yes | 132(91.03) | 65(92.86) | 67(89.33) |  | 36(97.30) | 24(100.00) | 12(92.31) |  |
| No | 13(8.97) | 5(7.14) | 8(10.67) |  | 1(2.70) | null | 1(7.69) |  |
| boundary |  |  |  | 1.000 |  |  |  | 0.273 |
| clear | 117(80.69) | 56(80.00) | 61(81.33) |  | 29(78.38) | 17(70.83) | 12(92.31) |  |
| fuzzy | 28(19.31) | 14(20.00) | 14(18.67) |  | 8(21.62) | 7(29.17) | 1(7.69) |  |
| morphology |  |  |  | 1.000 |  |  |  | 1.000 |
| regular | 145(100.00) | 70(100.00) | 75(100.00) |  | 36(97.30) | 23(95.83) | 13(100.00) |  |
| irregular | 0(0.00) | null | null |  | 1(2.70) | 1(4.17) | null |  |
| margin |  |  |  | 0.323 |  |  |  | 0.758 |
| smooth | 140(96.55) | 66(94.29) | 74(98.67) |  | 35(94.59) | 22(91.67) | 13(100.00) |  |
| unsmooth | 5(3.45) | 4(5.71) | 1(1.33) |  | 2(5.41) | 2(8.33) | null |  |
| internal echoes |  |  |  | 0.670 |  |  |  | 1.000 |
| homogeneous | 133(91.72) | 63(90.00) | 70(93.33) |  | 36(97.30) | 23(95.83) | 13(100.00) |  |
| heterogeneous | 12(8.28) | 7(10.00) | 5(6.67) |  | 1(2.70) | 1(4.17) | null |  |
| rear acoustic shadow |  |  |  | 0.129 |  |  |  | 0.796 |
| attenuated | 38(26.21) | 13(18.57) | 25(33.33) |  | 9(24.32) | 5(20.83) | 4(30.77) |  |
| unchanged | 85(58.62) | 45(64.29) | 40(53.33) |  | 22(59.46) | 15(62.50) | 7(53.85) |  |
| enhanced | 22(15.17) | 12(17.14) | 10(13.33) |  | 6(16.22) | 4(16.67) | 2(15.38) |  |
| volume |  |  |  | 0.187 |  |  |  | 0.001 |
| ≤15cm3 | 110(75.86) | 57(81.43) | 53(70.67) |  | 30(81.08) | 24(100.00) | 6(46.15) |  |
| ＞15cm3 | 35(24.14) | 13(18.57) | 22(29.33) |  | 7(18.92) | null | 7(53.85) |  |
| BI_RADS |  |  |  |  |  |  |  |  |
| category 0 | 1(0.7) | 0(0.0) | 1(1.3) | 0.097 | 0(0.0) | 0(0.0) | 0(0.0) | 0.291 |
| category 3 | 9(6.2) | 4(5.7) | 5(6.7) |  | 2(5.4) | 0(0.0) | 2(15.4) |  |
| category 4a | 14(9.7) | 11(15.7) | 3(4.0) |  | 3(8.1) | 2(8.3) | 1(7.7) |  |
| category 4b | 30(20.7) | 16(22.9) | 14(18.7) |  | 9(24.3) | 7(29.2) | 2(15.4) |  |
| category 4c | 37(25.5) | 19(27.1) | 18(24.0) |  | 9(24.3) | 5(20.8) | 4(30.8) |  |
| category 5 | 54(37.2) | 20(28.6) | 34(45.3) |  | 14(37.8) | 10(41.7) | 4(30.8) |  |

BMI: body mass index; ADC: Apparent Diffusion Coefficient; BC: breast cancer; AFP: alpha-fetoprotein; CEA: carcinoembryonic antigen; CA125: cancer antigen 125; CA153: cancer antigen 153; CA199: cancer antigen 199; MR: magnetic resonance; TIC: Time-Intensity Curve; US: ultrasound; BI_RADS: Breast Imaging-Reporting and Data System. p < 0.05 indicates a significant difference.

Table S4 Performance of 9 MRI habitat models in training and testing sets

| Model | Accuracy | AUC | 95% CI | Sensitivity | Specificity | F1_score | Cohort |
| --- | --- | --- | --- | --- | --- | --- | --- |
| Model_H1_multi-parametric | 0.807 | 0.88 | 0.825 - 0.935 | 0.813 | 0.8 | 0.813 | Train |
| Model_H2_multi-parametric | 0.738 | 0.83 | 0.767 - 0.894 | 0.653 | 0.829 | 0.721 | Train |
| Model_H3_multi-parametric | 0.759 | 0.814 | 0.747 - 0.883 | 0.747 | 0.771 | 0.762 | Train |
| Model_Habitat_Whole | 0.793 | 0.867 | 0.810 - 0.924 | 0.813 | 0.771 | 0.803 | Train |
| Model_DCE1_H1+H2+H3 | 0.697 | 0.739 | 0.659 - 0.819 | 0.693 | 0.7 | 0.703 | Train |
| Model_DCE2_H1+H2+H3 | 0.71 | 0.785 | 0.713 - 0.858 | 0.893 | 0.514 | 0.761 | Train |
| Model_DWI_H1+H2+H3 | 0.717 | 0.767 | 0.692 - 0.843 | 0.76 | 0.671 | 0.735 | Train |
| Model_T1_H1+H2+H3 | 0.717 | 0.767 | 0.692 - 0.843 | 0.76 | 0.671 | 0.735 | Train |
| Model_T2_H1+H2+H3 | 0.697 | 0.777 | 0.703 - 0.851 | 0.573 | 0.829 | 0.662 | Train |
| Model_H1_multi-parametric | 0.784 | 0.801 | 0.655 - 0.9478 | 0.846 | 0.75 | 0.733 | test |
| Model_H2_multi-parametric | 0.703 | 0.631 | 0.413 - 0.850 | 0.615 | 0.75 | 0.593 | test |
| Model_H3_multi-parametric | 0.649 | 0.67 | 0.492 - 0.847 | 1 | 0.458 | 0.667 | test |
| Model_Habitat_Whole | 0.676 | 0.732 | 0.561 - 0.904 | 0.923 | 0.542 | 0.667 | test |
| Model_DCE1_H1+H2+H3 | 0.73 | 0.681 | 0.474 - 0.888 | 0.615 | 0.792 | 0.615 | test |
| Model_DCE2_H1+H2+H3 | 0.757 | 0.673 | 0.472 - 0.874 | 0.692 | 0.792 | 0.667 | test |
| Model_DWI_H1+H2+H3 | 0.757 | 0.742 | 0.566 - 0.918 | 0.615 | 0.833 | 0.64 | test |
| Model_T1_H1+H2+H3 | 0.757 | 0.742 | 0.566 - 0.918 | 0.615 | 0.833 | 0.64 | test |
| Model_T2_H1+H2+H3 | 0.703 | 0.696 | 0.505 - 0.886 | 0.769 | 0.667 | 0.645 | test |

AUC: area under the curve; CI: confidence interval; Model_T1_H1+H2+H3: radiomics model based on T1WI habitat; Model_T2_H1+H2+H3: radiomics model based on T2WI habitat; Model_DWI_H1+H2+H3: radiomics model based on DWI-MRI habitat; Model_DCE1_H1+H2+H3: radiomics model based on first phase of Dynamic Contrast-Enhanced T1WI habitat; Model_DCE2_H1+H2+H3: radiomics model based on second phase of Dynamic Contrast-Enhanced T1WI habitat; Model_H1_multi-parametric: radiomics model based on habitat 1; Model_H2_multi-parametric: radiomics model based on habitat 2; Model_H3_multi-parametric: radiomics model based on habitat 3; Model_Habitat_Whole: radiomics model based on 3 habitat regions.
